# Supplementary material for: Photochemical CO2 conversion on pristine and Mg-doped gallium nitride (GaN): a comprehensive DFT study based on a cluster model approach
Source: Royal Society of Chemistry journal article supplement (doi:10.1039/d1qm01118a), 2021-01-01
Supplement: d1qm01118a1.pdf [file d1qm01118a1.pdf]

## Photochemical CO<sub>2</sub> Conversion on Pristine and Mg-doped Gallium Nitride (GaN): a Comprehensive DFT Study Based on Cluster Model Approach

Valeria Butera,<sup>\*a</sup> Hermann Detz<sup>a,b</sup>

<sup>a</sup>CEITEC - Central European Institute of Technology, Brno University of Technology, Purkyňova 123, Brno 612 00, Czech Republic.

Corresponding author E-mail: [butera@vutbr.cz](mailto:butera@vutbr.cz) (Valeria Butera)

<sup>b</sup>Center for Micro- and Nanostructures & Institute of Solid State Electronics, TU Wien, 1040 Vienna, Austria.

†Electronic Supplementary Information (ESI) available

### Supporting Information

1. Selection of the computational protocol.
2. Comparison of the geometric parameters between Mg-doped clusters and PBC structures in ref. 5.
3. Band Gaps derived from PES/IPES process.
4. Stability of the selected cluster models.
5. Simulated UV-spectra calculated by TD-DFT method.
6. Alternative reaction mechanism involving **TS12'**\_GaN.
7. Alternative reaction mechanism involving **TS13'**\_GaN and **TS13''**\_GaN.
8. Cartesian Coordinates along with electronic energies of all the stationary points presented in the main text.

#### 1. Selection of the computational protocol.

The reliability of the selected functional has been checked by performing further tests on the smaller A\_GaN and using the double hybrid PBE0DH functional that combine exact HF exchange with an MP2-like correlation to a DFT calculation. Calculations performed at B3LYP gave similar adsorption energies as the more accurate double hybrid PBE0DH level of theory. Moreover, good agreement between the calculated geometric parameters using the two computational methods has been found.

**Table S1.** CO<sub>2</sub> Adsorption energy on **A\_GaN** cluster model and main geometric parameters calculated using B3LYP and PBE0DH functionals.

|                        | B3LYP/6-31G | PBE0DH/6-31G |
|------------------------|-------------|--------------|
| <b>Ads energy (eV)</b> | -2.74       | -3.35        |
| <b>Ga1 N1 (Å)</b>      | 1.889       | 1.888        |
| <b>a2 N1(Å)</b>        | 1.971       | 1.970        |
| <b>Ga2 N2 (Å)</b>      | 1.850       | 1.845        |
| <b>Ga3 N2(Å)</b>       | 1.861       | 1.856        |
| <b>Ga1-N1-Ga2 (°)</b>  | 112.1       | 111.9        |
| <b>N1-Ga2-N2 (°)</b>   | 111.9       | 111.9        |
| <b>Ga2-N2-Ga3 (°)</b>  | 119.7       | 119.7        |

Mi et al. have calculated an adsorption energy of 1.76 eV for one CO<sub>2</sub> molecule adsorbed on pristine GaN surface by periodic boundary condition calculations. Among the tested functionals, B3LYP gives an adsorption energy whose value is closer to the one calculated by PBC approach but still the adsorption is found to be ~1 eV more favorable than PBC method. By computing the counterpoise error has implemented in Gaussian 16, the corrected adsorption energy is 2.01 eV. A similar result of 2.15 eV (see table 1 in the main text) is also computed by performing single-point calculations using more extended 6-31+G\*\* basis sets, except for Ga, on fully optimized geometry. Based on these results we selected the B3LYP functional, LANL2DZ for Ga and 6-31G basis set for all the other atoms to perform the geometry optimization of all the stationary points. In order to obtain more

accurate energies, single point calculations on the optimized geometries using the more extended 6-31+G\*\* basis set has been performed.

## 2. Comparison of the geometric parameters between Mg-doped clusters and PBC structures in ref. 21.

**Table S2.** Main calculated geometric parameters for clusters **A\_Mg1** and **B\_Mg1** along with the related values for PBC calculations taken from Ref. 21.

|                       | <b>A_Mg1</b>       | <b>B_Mg1</b>        | <b>Ref. 21</b> |
|-----------------------|--------------------|---------------------|----------------|
|                       | B3LYP/<br>6-31+G** | B3LYP /<br>6-31+G** | PBC            |
| <b>C-N2 (Å)</b>       | 1.424              | 1.418               | 1.40           |
| <b>O1-Ga1 (Å)</b>     | 1.986              | 2.335               | 2.23           |
| <b>O2-Ga3(Å)</b>      | 2.490              | 2.053               | 1.98           |
| <b>Ga1-N2-Ga3 (°)</b> | 168.4              | 167.5               |                |
| <b>O1-C-O2 (°)</b>    | 125.2              | 126.2               |                |

## 3. Stability of the selected cluster models.

The relative stabilities of the model clusters were investigated by computing the binding energies per atom,  $E_b$ , according to the following equation<sup>1</sup>:

$$E_b = \frac{1}{N} (E_{TOT}^{cluster} - \sum_i n E_i) \quad (1)$$

where  $E_{TOT}^{cluster}$  are the total energies of the pure and Mg-doped clusters,  $n$  and  $E_i$  are the number and the total energies of the free atoms, respectively. According to (1), the binding energy,  $E_b$ , is related to the energy required to add the dopant atom to GaN, characterizing the stability of the dopant-GaN systems. Therefore, the more negative the  $E_b$  value, the more stable the Mg-doped system is. All the calculated binding energies are reported in table S3.

**Table S3.** Binding energies (eV) calculated by eq. (1) for all the studied cluster models.

|                         | <b>A_GaN</b> | <b>A_Mg<sup>surf</sup></b> | <b>A_Mg<sup>FL</sup></b> | <b>A_Mg<sup>bulk</sup></b> | <b>B_GaN</b> | <b>B_Mg<sup>surf</sup></b> | <b>B_Mg<sup>FL</sup></b> | <b>B_Mg<sup>bulk</sup></b> |
|-------------------------|--------------|----------------------------|--------------------------|----------------------------|--------------|----------------------------|--------------------------|----------------------------|
| <b><math>E_b</math></b> | -3.27        | -3.29                      | -3.27                    | -3.29                      | -3.44        | -3.45                      | -3.44                    | -3.46                      |

As it can be seen from table S3, more negative binding energies are obtained by increasing the size of the cluster, which underlines the higher stabilities of bigger cluster models. However, this difference is not significant in any of the studied cases, underlines a relative stability of all the selected clusters. Moreover, doping with Mg has not influence in the relative binding energies which means that the stability of the Mg-doped clusters is essentially similar to the one of the pure cases. This behavior can be explained by considering the tiny difference between the radii of  $Mg^{2+}$  (0.65 Å) and  $Ga^{3+}$  (0.62 Å).

## 4. Band Gaps derived from PES/IPES process.

As mentioned in the main text, band gaps can also be derived from the gap between the photoemission (PES) and inverse-photoemission (IPES) energy levels. It is indeed possible to compute the electron affinity/ionization potential of pristine and Mg-doped GaN by the addition/removal of an electron from the neutral system. This would be analogous to the measurement of the fundamental gap arising from the photoemission/ inverse-photoemission (PES/IPES) process.

The change in the energy of a system after removal of an electron is the work function or ionization potential (IP), while the electron affinity (EA) corresponds to the change in the energy after the addition of the electron. Therefore, the IP-EA difference represents the experimental measured gap obtained from photoemission spectroscopy. Taking into account that ionization potential is defined by:

$$IP = E(N - 1) - E(N) \quad (1)$$

where  $E(N - 1)$  is the energy after electron removal and  $E(N)$  is the  $N$ -electron ground state, and electron affinity corresponds to:

$$EA = E(N) - E(N + 1) \quad (2)$$

where  $E(N + 1)$  is the energy after electron addition, the energy gap between them can be expressed as:<sup>ref</sup>

$$E_g = E(N-1) + E(N+1) - 2 E(N) \quad (3)$$

### 5. Simulated UV-spectra calculated by TD-DFT method.

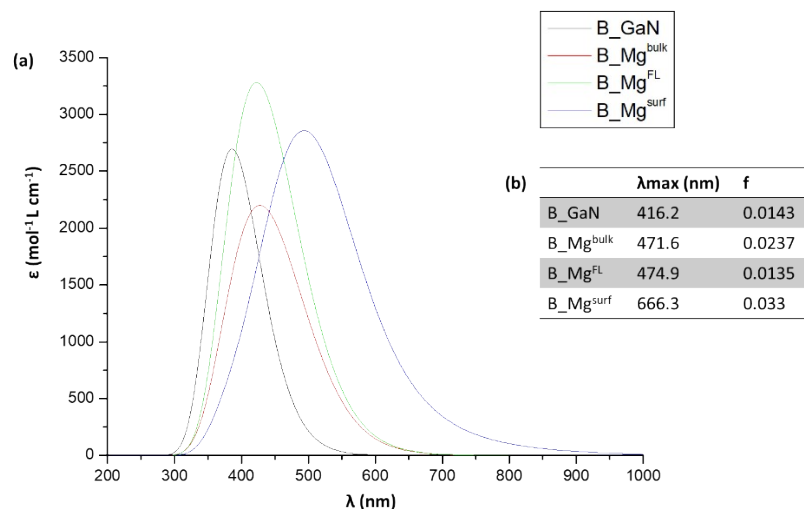

**Figure S1.** (a) Computed absorption spectra of pure **B\_GaN** (black), and Mg-doped **B\_Mg<sup>bulk</sup>**(red), **B\_Mg<sup>FL</sup>** (green) and **B\_Mg<sup>surf</sup>** (blue) cluster models and their corresponding (b)  $\lambda_{\text{max}}$  (nm) and oscillator strengths,  $f$ .

### 6. Alternative reaction mechanism involving TS12'\_GaN.

Figure S2 shows an alternative mechanism in which after the formation of the intermediate 12A\_GaN, an additional molecule of hydrogen approaches forming 12'A\_GaN. The hydrogen molecule dissociates heterolytically forming 18A\_GaN, in which a Ga-H bond is formed along with an additional O-H bond, whose oxygen keeps its bond with the surface Ga atom. The following transition state, TS18\_GaN involves the breaking of the uncoordinated OH group leading to 19A\_GaN. The hydrogen transfer from the Ga atom to the carbon leads to the formation of 20A\_GaN. As mentioned in the main text, no transition state related to the final production of methanol has been intercepted.

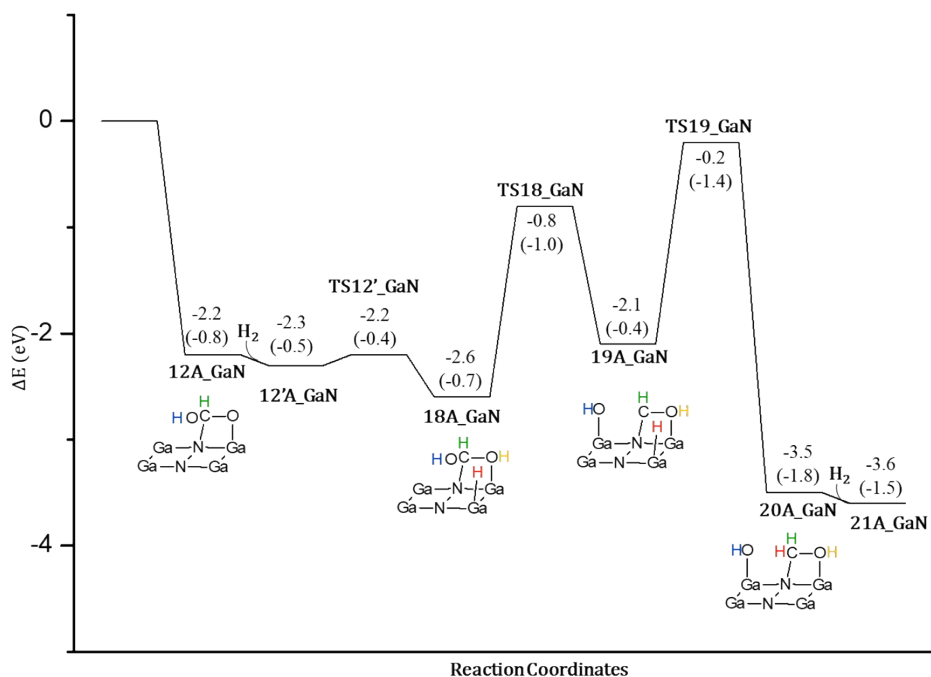

**Figure S2.** Alternative reaction mechanism involving TS12'\_GaN.

### 7. Alternative reaction mechanism involving TS13'\_GaN and TS13''\_GaN.

Alternatively to TS13\_GaN discussed in the main text, to additional transition states have been intercepted:

- TS13'\_GaN, in which an uncoordinated hydrogen molecule dissociates forming a C-H and OH bonds. However the IRC of this transition state reveals once the hydrogen binds the oxygen atoms, the already bound H is transferred to the next Ga atom. However, the energy barrier involved in this step is 0.8 eV higher than the one discussed in the main text and, therefore, this mechanism can be ruled out.
- TS13''\_GaN, where an uncoordinated hydrogen molecule dissociates heterolytically forming a C-H bond alongside a N-H bond, as in 22A\_GaN. The adsorbed hydrogen is then transferred to the oxygen atom via TS22\_GaN. A further hydrogen molecule approaches the surface and dissociates forming the already discussed intermediate 16A\_GaN. By applying the ESM to this mechanism, a  $\delta E$  of 4.2eV is computed (TDI=10A\_GaN and TDTS=TS24\_GaN). Due to the higher energetic span, this mechanism can be also ruled out.

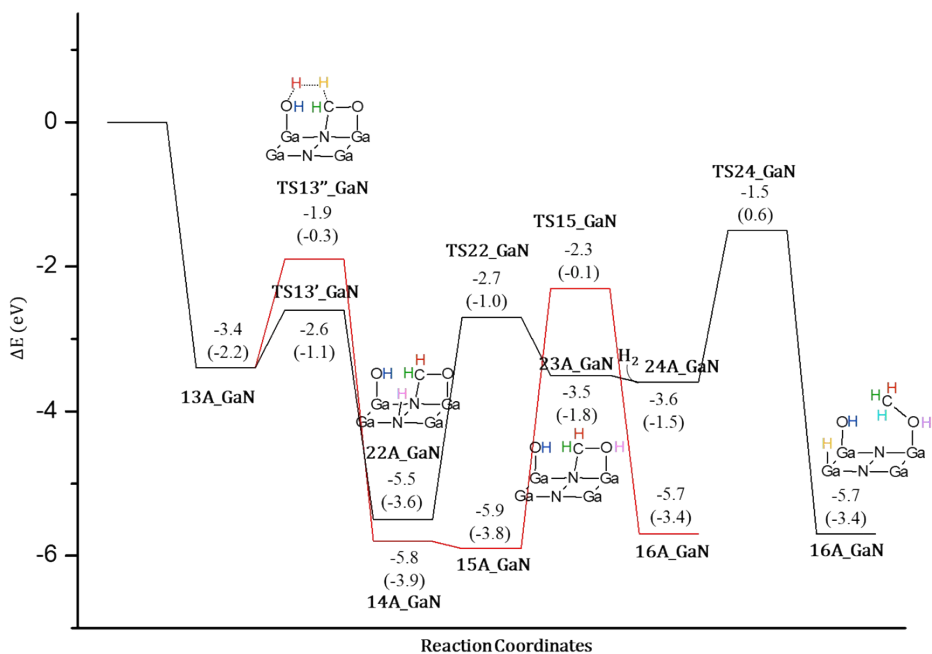

Figure S3. Alternative reaction mechanism involving TS13'\_GaN and TS13''\_GaN.

**8. Cartesian Coordinates along with electronic energies of all the stationary points presented in the main text. The energies are given in Hartree and referred to B3LYP functional, 6-31G basis set for N, H, C, O and LAN2LDZ for Ga atoms.**

#### A\_GaN

HF=-869.7947543

|    |             |             |             |
|----|-------------|-------------|-------------|
| Ga | 1.52175000  | -2.46710500 | 1.99682700  |
| Ga | 1.58383300  | 2.72585200  | 1.84698200  |
| N  | 1.60390400  | -0.64409600 | 1.63016900  |
| Ga | 3.16508600  | 0.08573600  | 0.95735800  |
| N  | 3.22886400  | -3.12907200 | 0.82910900  |
| N  | 3.12786400  | 2.05781100  | 0.98791200  |
| Ga | 3.27331900  | -2.39420100 | -1.00095800 |
| Ga | 3.19448300  | 2.77963200  | -0.93671000 |
| N  | 3.18005500  | -0.48015400 | -0.96038500 |
| Ga | -1.49108600 | -2.48819800 | 1.98945600  |
| Ga | -1.63194900 | 2.70134000  | 1.84372500  |
| N  | -1.60038400 | -0.66640400 | 1.62481300  |
| Ga | -0.00207400 | 0.03657000  | 0.99849600  |
| Ga | -3.17152000 | 0.03969000  | 0.95098600  |
| N  | 0.02179400  | -3.15469500 | 0.82996700  |
| N  | -0.01801300 | 2.01825100  | 1.07192400  |
| N  | -3.18548400 | -3.17807400 | 0.82270200  |
| N  | -3.16397700 | 2.01077100  | 0.98170200  |
| Ga | 0.03304800  | -2.39313500 | -0.94560000 |
| Ga | -0.02162100 | 2.75509300  | -0.93985400 |
| Ga | -3.23366600 | -2.44106800 | -1.00175800 |
| Ga | -3.23783100 | 2.73057600  | -0.94295000 |
| N  | 0.00804400  | -0.48725900 | -0.97408400 |
| N  | -3.17423700 | -0.52691500 | -0.96530000 |

|    |             |             |             |
|----|-------------|-------------|-------------|
| Ga | 1.58653500  | 0.17125300  | -1.89968700 |
| Ga | -1.58589100 | 0.14182700  | -1.90190400 |
| N  | 1.63099900  | -3.10251600 | -1.94942400 |
| N  | 1.57340500  | 2.10349400  | -1.83229200 |
| N  | -1.55484000 | -3.10550400 | -1.91984200 |
| N  | -1.60113400 | 2.07685000  | -1.83590300 |
| H  | 1.57334000  | 4.27582900  | 1.87184100  |
| H  | -1.64521100 | 4.25129100  | 1.86865100  |
| H  | -4.00630400 | -2.85866300 | 1.29758000  |
| H  | -4.46720600 | -0.45372500 | 1.59094300  |
| H  | -4.04630500 | 2.37339400  | 1.37932300  |
| H  | 4.00372100  | 2.43488600  | 1.38724200  |
| H  | 4.46739000  | -0.38558300 | 1.59978000  |
| H  | 4.04367200  | -2.79722200 | 1.30561800  |
| H  | -4.44528300 | -3.01766300 | -1.75430900 |
| H  | -4.02389700 | -0.19925300 | -1.45425400 |
| H  | -4.49400700 | 2.19978700  | -1.67976100 |
| H  | -3.26376400 | 4.28033900  | -0.92735400 |
| H  | -0.03343900 | 4.30499800  | -0.91909800 |
| H  | 4.46004800  | 2.26807200  | -1.67088000 |
| H  | 3.19676300  | 4.32961000  | -0.92096000 |
| H  | -1.58611600 | -2.78133100 | -2.89101800 |
| H  | 1.63101800  | -2.75671000 | -2.88787000 |
| H  | -1.60556600 | -0.35189100 | -3.36754100 |
| H  | 1.61431300  | -0.32727500 | -3.36435900 |
| H  | -1.62615500 | 2.45879600  | -2.80968500 |
| H  | 1.59109900  | 2.48356600  | -2.80647600 |
| H  | -1.57488000 | -4.12685000 | -1.96332000 |
| H  | 1.63848800  | -4.10233800 | -1.96016700 |
| H  | -3.17616700 | -4.17803500 | 0.80614100  |
| H  | 0.02937200  | -4.15474300 | 0.81509600  |
| H  | 3.23476300  | -4.12912100 | 0.81248300  |
| H  | 4.02621700  | -0.13784900 | -1.44638200 |
| H  | 4.49119500  | -2.94942300 | -1.74541000 |

### 1A\_GaN

HF=-1058.395636

|    |             |             |             |
|----|-------------|-------------|-------------|
| Ga | 1.49087500  | -2.41400800 | 1.88738000  |
| Ga | 1.45603500  | 2.74994100  | 1.83127400  |
| N  | 1.54575700  | -0.61410700 | 1.60956500  |
| Ga | 3.16216100  | 0.15595200  | 1.08626500  |
| N  | 3.28294500  | -3.07908800 | 0.99383100  |
| N  | 3.08103800  | 2.10062000  | 1.10626600  |
| Ga | 3.46316000  | -2.34757100 | -0.84865200 |
| Ga | 3.28221800  | 2.81591800  | -0.81563900 |
| N  | 3.32625800  | -0.44489900 | -0.81515400 |
| Ga | -1.54117600 | -2.60832200 | 1.94468200  |
| Ga | -1.74833300 | 2.66509300  | 1.57300200  |
| N  | -1.66218400 | -0.55075500 | 1.59077800  |
| Ga | 0.02250200  | 0.10112700  | 0.81468000  |
| Ga | -3.22656800 | 0.04197400  | 0.51083200  |
| N  | 0.08708600  | -3.16530100 | 0.73974200  |
| N  | -0.01213400 | 2.02654700  | 0.81851100  |
| N  | -3.10827200 | -3.24904600 | 0.47855600  |

|    |             |             |             |
|----|-------------|-------------|-------------|
| N  | -3.21549100 | 1.95747100  | 0.51146000  |
| Ga | 0.21662400  | -2.43353600 | -1.04723500 |
| Ga | 0.07718400  | 2.73116500  | -1.07428200 |
| Ga | -3.02971400 | -2.53852500 | -1.34640800 |
| Ga | -3.12744000 | 2.64603300  | -1.33280800 |
| N  | 0.12970300  | -0.53500100 | -1.06432200 |
| N  | -2.99719400 | -0.62121500 | -1.32143500 |
| Ga | 1.79369500  | 0.17884700  | -1.88444000 |
| Ga | -1.36669900 | 0.09864100  | -2.15525300 |
| N  | 1.91153700  | -3.10096900 | -1.90258700 |
| N  | 1.75186500  | 2.09565400  | -1.83967400 |
| N  | -1.26592700 | -3.16360500 | -2.12640200 |
| N  | -1.40892400 | 2.00899900  | -2.09552700 |
| H  | 1.41537500  | 4.29968300  | 1.84326000  |
| H  | -1.79170500 | 4.21459200  | 1.58418100  |
| H  | -3.96991400 | -2.94186600 | 0.88381100  |
| H  | -4.49644100 | -0.54435000 | 1.12053800  |
| H  | -4.11160500 | 2.28878800  | 0.92053000  |
| H  | 3.90977700  | 2.50157000  | 1.56800000  |
| H  | 4.40638500  | -0.30820200 | 1.83927400  |
| H  | 4.05136700  | -2.72931600 | 1.53146500  |
| H  | -4.16152000 | -3.12899900 | -2.19187200 |
| H  | -3.81673700 | -0.30124700 | -1.88168900 |
| H  | -4.31104700 | 2.08697900  | -2.16298400 |
| H  | -3.18272100 | 4.19511800  | -1.33173700 |
| H  | 0.03569700  | 4.28051700  | -1.06681800 |
| H  | 4.61114700  | 2.32357100  | -1.44273000 |
| H  | 3.25480900  | 4.36584700  | -0.81203200 |
| H  | -1.22569700 | -2.84637500 | -3.09947600 |
| H  | 1.97997000  | -2.76129400 | -2.84076400 |
| H  | -1.25136500 | -0.42089200 | -3.59537500 |
| H  | 1.95706700  | -0.33572500 | -3.33644300 |
| H  | -1.36748900 | 2.39247900  | -3.06333600 |
| H  | 1.83808800  | 2.47745900  | -2.80462300 |
| H  | -1.26386900 | -4.18541700 | -2.16313800 |
| H  | 1.93807100  | -4.10051900 | -1.90470300 |
| H  | -3.07941600 | -4.24868900 | 0.47052300  |
| H  | 0.11438600  | -4.16524800 | 0.73448800  |
| H  | 3.30893100  | -4.07946900 | 0.98645400  |
| H  | 4.20478000  | -0.08877900 | -1.23427500 |
| H  | 4.74311500  | -2.89283200 | -1.47304600 |
| C  | -1.87155300 | 0.04934600  | 2.92163400  |
| O  | -2.12047900 | -0.69106800 | 3.89210300  |
| O  | -1.79112300 | 1.38792500  | 3.00316300  |

### B\_GaN

HF=-1849.020055

|    |            |             |             |
|----|------------|-------------|-------------|
| Ga | 3.95805700 | -0.34695700 | -3.27695200 |
| Ga | 0.99678900 | 0.95568000  | -3.05348500 |
| N  | 2.00170200 | -0.67135700 | -3.18586000 |
| N  | 4.32135100 | 1.47926100  | -3.20100000 |
| Ga | 4.24943100 | -3.18054300 | -1.62189100 |
| Ga | 1.38064000 | -1.70751100 | -1.59757000 |
| Ga | 1.71860100 | -4.47638000 | 0.03276800  |

|    |             |             |             |
|----|-------------|-------------|-------------|
| N  | 2.31401100  | -3.41444100 | -1.54595900 |
| N  | 4.66549300  | -1.27261800 | -1.57103700 |
| N  | 5.00974900  | -4.02352500 | 0.05909700  |
| Ga | 3.58740000  | 2.44499100  | -1.80748700 |
| Ga | 3.19369800  | 5.15028400  | -0.17755200 |
| Ga | 0.62008500  | 3.70785500  | -1.47217700 |
| N  | 1.65958400  | 2.10751800  | -1.67274100 |
| N  | 1.26544900  | 4.82501400  | -0.06807500 |
| N  | 3.95220300  | 4.25229700  | -1.61539500 |
| Ga | 3.90176700  | -0.40644700 | -0.01461000 |
| Ga | 3.48773100  | 2.36315300  | 1.55798700  |
| Ga | 4.21888200  | -3.18747800 | 1.69100100  |
| Ga | 3.84905400  | -0.44678600 | 3.26295600  |
| Ga | 1.04981500  | 1.06116300  | -0.01010200 |
| Ga | 0.66274500  | 3.85340300  | 1.59736100  |
| Ga | 1.34093200  | -1.67275800 | 1.60744200  |
| Ga | 0.99722100  | 1.12570300  | 3.20358400  |
| N  | 1.97760900  | -0.68585600 | -0.00387500 |
| N  | 1.59413700  | 2.08682800  | 1.55313100  |
| N  | 2.28622900  | -3.39210600 | 1.60953000  |
| N  | 1.92310200  | -0.64801500 | 3.17909600  |
| N  | 4.29631700  | 1.50103600  | 0.01535700  |
| N  | 3.92749400  | 4.27471700  | 1.60131900  |
| N  | 4.64084900  | -1.25002200 | 1.64515400  |
| N  | 4.27191600  | 1.52356400  | 3.23112300  |
| Ga | -1.24337600 | -1.08646300 | -3.24899400 |
| Ga | -4.11369900 | 0.39012800  | -3.25863300 |
| N  | -3.19483500 | -1.27471600 | -3.27976500 |
| N  | -0.78425100 | 0.74359600  | -3.10693900 |
| Ga | -0.94285300 | -3.85638600 | -1.62196200 |
| Ga | -3.76985700 | -2.36176900 | -1.62867700 |
| Ga | -3.42567700 | -5.11284500 | 0.00145300  |
| N  | -2.85247500 | -4.06306800 | -1.61552100 |
| N  | -0.51672600 | -1.94193100 | -1.58815400 |
| N  | -0.19300300 | -4.65075200 | 0.02216700  |
| Ga | -1.60966900 | 1.71448500  | -1.73446100 |
| Ga | -2.00141700 | 4.45397000  | -0.10910100 |
| Ga | -4.48254200 | 3.16284000  | -1.67312500 |
| N  | -3.53130600 | 1.53436900  | -1.87471000 |
| N  | -3.91822700 | 4.17959900  | -0.18834200 |
| N  | -1.16030400 | 3.51495700  | -1.51264300 |
| Ga | -1.29640800 | -1.06656800 | -0.03124800 |
| Ga | -1.69649900 | 1.68418900  | 1.54577700  |
| Ga | -0.97601000 | -3.83287900 | 1.64275000  |
| Ga | -1.33737700 | -1.08922300 | 3.20709800  |
| Ga | -4.13910500 | 0.41159500  | -0.04209300 |
| Ga | -4.50793900 | 3.18546200  | 1.54354300  |
| Ga | -3.79468500 | -2.33934500 | 1.58749900  |
| Ga | -4.16377500 | 0.43411100  | 3.17359500  |
| N  | -3.18979100 | -1.32198300 | -0.06816400 |
| N  | -3.56436700 | 1.43954500  | 1.47806700  |
| N  | -2.87571000 | -4.06182300 | 1.59116600  |
| N  | -3.23426000 | -1.32766600 | 3.15800800  |
| N  | -0.86403000 | 0.84599500  | -0.02179700 |



|   |             |             |             |
|---|-------------|-------------|-------------|
| N | -1.24935000 | 3.58830600  | 1.53910100  |
| N | -0.54998100 | -1.89503300 | 1.57535100  |
| N | -0.90991500 | 0.85687900  | 3.14863400  |
| H | 3.49830200  | 6.61900200  | -0.02652500 |
| H | 0.77598900  | 5.74349500  | -0.04156000 |
| H | -1.69849200 | 5.94777600  | -0.06209100 |
| H | -4.42070900 | 5.07249200  | -0.07697600 |
| H | -6.02057300 | 2.96447500  | -1.68279100 |
| H | -5.65151200 | 0.19067200  | -3.26902800 |
| H | -5.30708000 | -2.56029600 | -1.63905400 |
| H | -5.67603900 | 0.21333100  | -0.05308400 |
| H | -6.04506000 | 2.98686400  | 1.53312600  |
| H | -5.70088000 | 0.23569400  | 3.16313400  |
| H | -5.33192400 | -2.53790500 | 1.57708100  |
| H | -4.96293300 | -5.31150500 | -0.00902800 |
| H | 5.31324900  | 1.60652700  | -3.19411600 |
| H | 4.94434400  | 4.38039700  | -1.60777600 |
| H | 4.91942300  | 4.40280800  | 1.60792900  |
| H | 5.28862800  | 1.62927600  | 0.02178300  |
| H | 5.65747000  | -1.14427100 | -1.56417900 |
| H | 5.26344000  | 1.65160000  | 3.23806000  |
| H | 5.63248700  | -1.12198800 | 1.65192600  |
| H | 6.00150400  | -3.89559600 | 0.06580800  |
| H | 4.82687600  | -3.82627900 | 2.93244700  |
| H | 4.45787400  | -1.05269800 | 4.51856000  |
| H | 1.63947800  | -1.15835200 | 4.04756900  |
| H | 2.00849100  | -3.93192200 | 2.46148700  |
| H | -0.73881400 | -1.72380700 | 4.48307900  |
| H | -0.36982100 | -4.49739100 | 2.89698300  |
| H | -3.55716000 | -1.82946300 | 4.01211500  |
| H | -3.18816900 | -4.60302100 | 2.42604100  |
| H | -2.73338900 | -6.49971600 | 0.01646500  |
| H | 4.80490600  | -5.00241400 | 0.06427700  |
| H | 2.46335200  | -5.82862800 | 0.05195300  |
| H | -0.39177100 | -5.67349600 | 0.02880100  |
| H | 3.87911600  | 1.95545900  | 4.04323400  |
| H | 1.43441000  | 1.90526600  | 4.47462500  |
| H | -1.31747000 | 1.28443700  | 4.00773800  |
| H | -3.76227200 | 1.23418600  | 4.43912300  |
| H | 3.53515100  | 4.70670800  | 2.41311100  |
| H | 1.09031100  | 4.65641700  | 2.84459600  |
| H | -1.66157800 | 4.03567100  | 2.37773400  |
| H | -4.10640200 | 3.98531000  | 2.80910500  |
| H | 4.52727000  | -1.11528800 | -4.44947100 |
| H | 1.70175500  | -1.21458800 | -4.02053800 |
| H | -0.66954900 | -1.78627700 | -4.48486300 |
| H | -3.49492900 | -1.88575700 | -4.05606400 |
| H | -3.15068600 | -4.63676900 | -2.42597000 |
| H | -0.32536300 | -4.53739000 | -2.85476000 |
| H | 2.04600200  | -3.96565500 | -2.39048600 |
| H | 4.87136500  | -3.86628400 | -2.81925200 |

**1B\_GaN**

HF=-1849.020055

|    |             |             |             |
|----|-------------|-------------|-------------|
| Ga | 3.91426600  | 0.17323300  | 3.29612800  |
| Ga | 0.92907900  | -1.15340400 | 3.13880800  |
| N  | 1.93124500  | 0.49904200  | 3.19130500  |
| N  | 4.25931100  | -1.64687000 | 3.15860800  |
| Ga | 4.30587400  | 3.06414000  | 1.74070800  |
| Ga | 1.41619100  | 1.62493400  | 1.61543000  |
| Ga | 1.83419000  | 4.45869300  | 0.08270700  |
| N  | 2.37305100  | 3.32487800  | 1.64224700  |
| N  | 4.68500700  | 1.15180800  | 1.63163700  |
| N  | 5.11087000  | 3.95026900  | 0.10467300  |
| Ga | 3.51752800  | -2.55786700 | 1.73934500  |
| Ga | 3.12218400  | -5.19121000 | -0.00635400 |
| Ga | 0.52601900  | -3.73872900 | 1.29195300  |
| N  | 1.57453800  | -2.16611300 | 1.62260800  |
| N  | 1.19695800  | -4.82131100 | -0.13241400 |
| N  | 3.87192300  | -4.35696100 | 1.47080800  |
| Ga | 3.94206800  | 0.35319000  | 0.03119000  |
| Ga | 3.50776600  | -2.35237200 | -1.64156400 |
| Ga | 4.34006800  | 3.18548500  | -1.57094800 |
| Ga | 3.95194000  | 0.50728400  | -3.24372700 |
| Ga | 1.07128800  | -1.05705100 | -0.05193600 |
| Ga | 0.65530800  | -3.78562200 | -1.78489600 |
| Ga | 1.43734700  | 1.72319200  | -1.59717500 |
| Ga | 1.07494400  | -1.01221700 | -3.28830200 |
| N  | 2.02237500  | 0.66834800  | -0.00325400 |
| N  | 1.61813500  | -2.03958700 | -1.64781000 |
| N  | 2.41089200  | 3.42266300  | -1.51933000 |
| N  | 2.02964000  | 0.74167600  | -3.18908300 |
| N  | 4.29762800  | -1.55844300 | -0.05628600 |
| N  | 3.91035200  | -4.26873000 | -1.74419900 |
| N  | 4.72353700  | 1.24001700  | -1.58319400 |
| N  | 4.33624400  | -1.47024500 | -3.27108400 |
| Ga | -1.30473400 | 1.19455900  | 3.11143700  |
| Ga | -4.15461200 | -0.40299800 | 3.09201200  |
| N  | -3.22013300 | 1.30212600  | 3.14421100  |
| N  | -0.96498300 | -0.72303200 | 2.88939900  |
| Ga | -0.87082100 | 3.87327600  | 1.64260300  |
| Ga | -3.72888700 | 2.39564200  | 1.56515200  |
| Ga | -3.30308900 | 5.19412300  | 0.03818900  |
| N  | -2.77371600 | 4.08747700  | 1.62398400  |
| N  | -0.46914300 | 1.94284400  | 1.53962300  |
| N  | -0.07222300 | 4.67709500  | 0.05488900  |
| Ga | -1.72015200 | -1.66243000 | 1.36865500  |
| Ga | -2.06296600 | -4.39449000 | -0.16427500 |
| Ga | -4.54189100 | -3.11296300 | 1.40430100  |
| N  | -3.60486700 | -1.45762400 | 1.56373100  |
| N  | -3.96706100 | -4.08972700 | -0.10684100 |
| N  | -1.24540700 | -3.46508600 | 1.27042600  |
| Ga | -1.24732200 | 1.14243300  | -0.06558700 |
| Ga | -1.66611700 | -1.57023100 | -1.74327400 |
| Ga | -0.84564100 | 3.93242700  | -1.60714200 |
| Ga | -1.22541700 | 1.24851200  | -3.27235300 |
| Ga | -4.11631000 | -0.31454400 | -0.12280700 |
| Ga | -4.50360300 | -3.02486700 | -1.81060500 |

|    |             |             |             |
|----|-------------|-------------|-------------|
| Ga | -3.69041300 | 2.48391200  | -1.64968400 |
| Ga | -4.07779900 | -0.22628300 | -3.33759300 |
| N  | -3.12707600 | 1.40955700  | -0.02892700 |
| N  | -3.52334900 | -1.29521900 | -1.68047300 |
| N  | -2.73824500 | 4.18889500  | -1.57711200 |
| N  | -3.11455600 | 1.51763000  | -3.24410300 |
| N  | -0.83287500 | -0.77273500 | -0.13344200 |
| N  | -1.25139400 | -3.48309800 | -1.76135800 |
| N  | -0.44490900 | 1.99110200  | -1.60729200 |
| N  | -0.82500900 | -0.70520000 | -3.27322000 |
| H  | 3.40674300  | -6.65852100 | -0.20688400 |
| H  | 0.70131700  | -5.73381600 | -0.21392300 |
| H  | -1.77666600 | -5.89230600 | -0.24788400 |
| H  | -4.48231300 | -4.96737900 | -0.25498700 |
| H  | -6.07535300 | -2.88641000 | 1.39199900  |
| H  | -5.68800500 | -0.17608500 | 3.07995200  |
| H  | -5.26220000 | 2.62239300  | 1.55301600  |
| H  | -5.64955800 | -0.08787000 | -0.13492400 |
| H  | -6.03688100 | -2.79814200 | -1.82282000 |
| H  | -5.61107500 | 0.00036600  | -3.34976900 |
| H  | -5.22372700 | 2.71064300  | -1.66187700 |
| H  | -4.83639300 | 5.42090200  | 0.02604300  |
| H  | 5.24852300  | -1.79294600 | 3.16641500  |
| H  | 4.86117800  | -4.50323600 | 1.47847800  |
| H  | 4.89963600  | -4.41497800 | -1.73635200 |
| H  | 5.28696500  | -1.70471700 | -0.04844400 |
| H  | 5.67430500  | 1.00552900  | 1.63944000  |
| H  | 5.32544200  | -1.61647600 | -3.26330400 |
| H  | 5.71277600  | 1.09377400  | -1.57537800 |
| H  | 6.10011100  | 3.80404700  | 0.11250000  |
| H  | 4.98140400  | 3.85489800  | -2.77678800 |
| H  | 4.59405800  | 1.14466900  | -4.46465700 |
| H  | 1.76935600  | 1.28663900  | -4.04452600 |
| H  | 2.15671100  | 3.99696600  | -2.35657900 |
| H  | -0.58937200 | 1.91094000  | -4.50562000 |
| H  | -0.20203000 | 4.62119800  | -2.81772700 |
| H  | -3.41420200 | 2.05293900  | -4.08545400 |
| H  | -3.02686000 | 4.76325600  | -2.39753000 |
| H  | -2.58577900 | 6.56743700  | 0.08444600  |
| H  | 4.92383200  | 4.93233100  | 0.12939800  |
| H  | 2.59762700  | 5.80106500  | 0.12542700  |
| H  | -0.25962300 | 5.69863300  | 0.08842200  |
| H  | 3.95214300  | -1.86674500 | -4.10493700 |
| H  | 1.51760800  | -1.75612600 | -4.58107700 |
| H  | -1.23130500 | -1.10039400 | -4.14591800 |
| H  | -3.66582500 | -0.98983000 | -4.62207800 |
| H  | 3.52633600  | -4.66526700 | -2.57800100 |
| H  | 1.09176600  | -4.55467700 | -3.05411500 |
| H  | -1.65714500 | -3.89891300 | -2.61895400 |
| H  | -4.09164000 | -3.78834500 | -3.09513100 |
| H  | 4.48678000  | 0.89852400  | 4.49947300  |
| H  | 1.67295100  | 1.06520400  | 4.02044900  |
| H  | -0.69661200 | 1.66483500  | 4.45855300  |
| H  | -3.51064900 | 1.83163800  | 3.97934900  |

|   |             |             |            |
|---|-------------|-------------|------------|
| H | -3.08488800 | 4.63014600  | 2.45245000 |
| H | -0.27082800 | 4.46337700  | 2.93166500 |
| H | 2.09867500  | 3.86384500  | 2.49347100 |
| H | 4.91261900  | 3.69706600  | 2.97266900 |
| C | -1.35231700 | -1.38920600 | 4.07936300 |
| O | -2.57880700 | -1.43108000 | 4.45403500 |
| O | -0.26722800 | -1.90810500 | 4.66501900 |

### A\_Mg1

HF=-1067.903909

|    |             |             |             |
|----|-------------|-------------|-------------|
| Ga | -2.02219800 | 2.11273000  | 2.32389500  |
| Ga | -1.03011100 | -2.99508600 | 1.68755700  |
| N  | -1.69462900 | 0.28979500  | 1.68363200  |
| Ga | -3.05751300 | -0.65736100 | 0.90059100  |
| N  | -3.77225300 | 2.47335800  | 0.92663200  |
| N  | -2.65942900 | -2.60581900 | 0.78127900  |
| Ga | -3.62100100 | 1.86415100  | -0.90641200 |
| Ga | -2.52730500 | -3.19646800 | -1.15210600 |
| N  | -3.15868200 | 0.00053000  | -0.99922200 |
| Ga | 2.11586600  | -2.34066300 | 1.80476100  |
| N  | 1.47772200  | 0.71897700  | 1.92803200  |
| Ga | 3.11861300  | 0.56398700  | 1.13243600  |
| N  | -0.63559800 | 3.12678700  | 1.04718500  |
| N  | 0.42367700  | -1.99779100 | 0.94606500  |
| N  | 2.50106700  | 3.77824800  | 1.15998800  |
| N  | 3.52706300  | -1.35003700 | 0.99365700  |
| Ga | -0.47343800 | 2.49122200  | -0.71407900 |
| Ga | 0.61968700  | -2.54240000 | -1.03541100 |
| Ga | 2.72829100  | 3.17530800  | -0.68632100 |
| Ga | 3.76694700  | -1.88820500 | -0.91850800 |
| N  | -0.03957300 | 0.63556200  | -0.87907400 |
| N  | 3.06145800  | 1.28835200  | -0.75936600 |
| Ga | -1.43924300 | -0.25968900 | -1.89178200 |
| Ga | 1.65134500  | 0.38235100  | -1.78202000 |
| N  | -2.13191500 | 2.92793900  | -1.78795600 |
| N  | -1.05027100 | -2.16346000 | -1.95384900 |
| N  | 0.98867300  | 3.55312700  | -1.64089200 |
| N  | 2.06282500  | -1.51492100 | -1.83816800 |
| H  | -0.71440800 | -4.51240300 | 1.62975300  |
| H  | 2.43460500  | -3.85781400 | 1.74636900  |
| H  | 3.35769200  | 3.59809900  | 1.64657000  |
| H  | 4.27686600  | 1.31671900  | 1.82644600  |
| H  | 4.42882200  | -1.51948600 | 1.44796600  |
| H  | -3.44751200 | -3.15724000 | 1.15575200  |
| H  | -4.46484300 | -0.50030500 | 1.50289900  |
| H  | -4.51883200 | 1.96089100  | 1.35479300  |
| H  | 3.83431700  | 4.02334600  | -1.37385800 |
| H  | 3.97084000  | 1.16417700  | -1.24180900 |
| H  | 4.91148000  | -1.07828600 | -1.57894100 |
| H  | 4.09795500  | -3.40096200 | -0.98563400 |
| H  | 0.93718900  | -4.05833400 | -1.09770800 |
| H  | -3.84966400 | -2.89959300 | -1.90371400 |
| H  | -2.22333900 | -4.71508900 | -1.21992800 |
| H  | 1.10819900  | 3.30032100  | -2.62620600 |

|    |             |             |             |
|----|-------------|-------------|-------------|
| H  | -2.03958000 | 2.64586000  | -2.74300400 |
| H  | 1.61961500  | 0.95495800  | -3.23196100 |
| H  | -1.53087500 | 0.29988200  | -3.34884900 |
| H  | 2.18119000  | -1.82563100 | -2.82603400 |
| H  | -0.96654000 | -2.47996400 | -2.94278700 |
| H  | 0.80754100  | 4.55936600  | -1.62836400 |
| H  | -2.33662600 | 3.90578000  | -1.74500400 |
| H  | 2.29621200  | 4.75686500  | 1.19713300  |
| H  | -0.84122000 | 4.10554000  | 1.08680000  |
| H  | -3.97743000 | 3.45285600  | 0.96468400  |
| H  | -3.90594800 | -0.47301100 | -1.53397100 |
| H  | -4.90964500 | 2.20566800  | -1.69803900 |
| Ga | 0.01753300  | -0.04456700 | 1.08301300  |
| Mg | 0.99094600  | 2.62322200  | 2.14141700  |

## A\_Mg2

HF=-1067.855208

|    |             |             |             |
|----|-------------|-------------|-------------|
| Ga | 1.52619700  | -2.47268100 | 2.03384400  |
| Ga | 1.58259900  | 2.71541800  | 1.88170700  |
| N  | 1.67935500  | -0.66928900 | 1.77010000  |
| Ga | 3.15620900  | 0.07752100  | 1.00369600  |
| N  | 3.23049200  | -3.13321800 | 0.83365800  |
| N  | 3.13464000  | 2.06213800  | 1.00033200  |
| Ga | 3.26290100  | -2.38360900 | -0.97976300 |
| Ga | 3.19314100  | 2.78442800  | -0.90160000 |
| N  | 3.18126600  | -0.47466500 | -0.93945800 |
| Ga | -1.49244200 | -2.49509300 | 2.02565400  |
| Ga | -1.63292200 | 2.68911700  | 1.87865000  |
| N  | -1.67541800 | -0.69448200 | 1.76667700  |
| Ga | -3.16270700 | 0.02828800  | 0.99777600  |
| N  | 0.02315000  | -3.16053100 | 0.83450200  |
| N  | -0.01964800 | 2.11721700  | 1.08270400  |
| N  | -3.18395300 | -3.18534400 | 0.82726900  |
| N  | -3.17272800 | 2.01176000  | 0.99436100  |
| Ga | 0.03289400  | -2.37273600 | -0.92111700 |
| Ga | -0.02315200 | 2.75830100  | -0.90471300 |
| Ga | -3.22149800 | -2.43247400 | -0.98060500 |
| Ga | -3.23927900 | 2.73224000  | -0.90770500 |
| N  | 0.00750100  | -0.50514200 | -1.00337200 |
| N  | -3.17433100 | -0.52410300 | -0.94447400 |
| Ga | 1.57210600  | 0.17197600  | -1.86520100 |
| Ga | -1.57034900 | 0.14356000  | -1.86718600 |
| N  | 1.63225400  | -3.09320200 | -1.94480500 |
| N  | 1.57611000  | 2.11472500  | -1.80369100 |
| N  | -1.55339800 | -3.09843000 | -1.91526200 |
| N  | -1.60935100 | 2.08777600  | -1.80669600 |
| H  | 1.57136800  | 4.26524600  | 1.91468200  |
| H  | -1.64725400 | 4.23912200  | 1.91147500  |
| H  | -4.00471200 | -2.86855800 | 1.30378700  |
| H  | -4.46677300 | -0.46567400 | 1.60980900  |
| H  | -4.04730200 | 2.36260200  | 1.41288300  |
| H  | 4.00263400  | 2.42792200  | 1.42038400  |
| H  | 4.46741700  | -0.39327700 | 1.61819000  |
| H  | 4.04502200  | -2.80330900 | 1.31155400  |

|    |             |             |             |
|----|-------------|-------------|-------------|
| H  | -4.44401200 | -3.01222100 | -1.74865000 |
| H  | -4.02388900 | -0.19518900 | -1.43408200 |
| H  | -4.49525100 | 2.20468000  | -1.64715400 |
| H  | -3.26597100 | 4.28192200  | -0.88410200 |
| H  | -0.03568700 | 4.30811900  | -0.87595500 |
| H  | 4.45887500  | 2.27731900  | -1.63862800 |
| H  | 3.19458200  | 4.33432600  | -0.87795000 |
| H  | -1.58506200 | -2.76872200 | -2.88436900 |
| H  | 1.63209000  | -2.74258900 | -2.88134600 |
| H  | -1.60569500 | -0.33678500 | -3.34832200 |
| H  | 1.61415300  | -0.31069400 | -3.34526600 |
| H  | -1.62765700 | 2.47093800  | -2.77594600 |
| H  | 1.58944500  | 2.49699500  | -2.77293800 |
| H  | -1.57307100 | -4.11900600 | -1.96367400 |
| H  | 1.64025900  | -4.09299100 | -1.96060800 |
| H  | -3.17404700 | -4.18524100 | 0.80570500  |
| H  | 0.03145000  | -4.16055800 | 0.81458300  |
| H  | 3.23671000  | -4.13322500 | 0.81179300  |
| H  | 4.02614300  | -0.13003400 | -1.42640100 |
| H  | 4.49238800  | -2.93979500 | -1.74014300 |
| Mg | -0.00269800 | 0.06085300  | 1.05926800  |

### A\_Mg3

HF=-1067.899032

|    |             |             |             |
|----|-------------|-------------|-------------|
| Ga | 1.50711300  | 2.60320900  | -1.86266700 |
| Ga | 1.59079500  | -2.59675100 | -1.88426900 |
| N  | 1.59886400  | 0.75141500  | -1.60822400 |
| Ga | 3.15651000  | 0.03050700  | -0.92595200 |
| N  | 3.22367200  | 3.23679100  | -0.73436900 |
| N  | 3.13904300  | -1.95198100 | -0.99571300 |
| Ga | 3.22420900  | 2.47529000  | 1.10260300  |
| Ga | 3.20080300  | -2.70990900 | 0.89770600  |
| N  | 3.17870900  | 0.54705600  | 0.99680100  |
| Ga | -1.48299400 | 2.61672700  | -1.85025900 |
| Ga | -1.62441700 | -2.57866200 | -1.88188300 |
| N  | -1.59563600 | 0.76676200  | -1.60555300 |
| Ga | -3.16042900 | 0.06317100  | -0.92158600 |
| N  | 0.01626300  | 3.25595800  | -0.73571800 |
| N  | -0.01275700 | -1.94394200 | -1.09424200 |
| N  | -3.19086200 | 3.27252900  | -0.72932800 |
| N  | -3.16430400 | -1.91760200 | -0.99137600 |
| Ga | -0.01551300 | -2.69200300 | 0.90022900  |
| Ga | -3.19332500 | 2.50689000  | 1.10243000  |
| Ga | -3.23165900 | -2.67414600 | 0.90245800  |
| N  | 0.00441300  | 0.37517800  | 0.97956100  |
| N  | -3.17354000 | 0.58021000  | 1.00005400  |
| Ga | 1.56840600  | -0.14251700 | 1.90611100  |
| Ga | -1.56633700 | -0.12181300 | 1.90737300  |
| N  | 1.62459900  | 3.14478800  | 2.04237800  |
| N  | 1.59210600  | -2.08378300 | 1.80660600  |
| N  | -1.56083200 | 3.14245700  | 2.01181600  |
| N  | -1.61432100 | -2.06481300 | 1.80894100  |
| H  | 1.58367100  | -4.14579700 | -1.94445000 |
| H  | -1.63495700 | -4.12789400 | -1.94191700 |

|    |             |             |             |
|----|-------------|-------------|-------------|
| H  | -4.01065900 | 2.96210000  | -1.21170700 |
| H  | -4.46644400 | 0.56394400  | -1.55960700 |
| H  | -4.03993400 | -2.26630700 | -1.41165800 |
| H  | 4.01012500  | -2.31107500 | -1.41746700 |
| H  | 4.46771200  | 0.51435700  | -1.56610700 |
| H  | 4.03917100  | 2.91740900  | -1.21778200 |
| H  | -4.45118100 | 3.05174700  | 1.84250000  |
| H  | -4.02378700 | 0.24165800  | 1.47930700  |
| H  | -4.48923300 | -2.16271500 | 1.65055500  |
| H  | -3.25445200 | -4.22329800 | 0.85204800  |
| H  | -0.02410000 | -4.24114300 | 0.84454400  |
| H  | 4.46505600  | -2.21249100 | 1.64391000  |
| H  | 3.20623500  | -4.25920500 | 0.84725200  |
| H  | -1.59202000 | 2.79591500  | 2.97492800  |
| H  | 1.62509300  | 2.77798700  | 2.97258200  |
| H  | -1.60637400 | 0.35614300  | 3.39652400  |
| H  | 1.61295100  | 0.33827700  | 3.39414800  |
| H  | -1.62129100 | -2.44123100 | 2.77547100  |
| H  | 1.59581600  | -2.45907400 | 2.77314100  |
| H  | -1.58329300 | 4.16191400  | 2.07770800  |
| H  | 1.63021600  | 4.14410300  | 2.07532600  |
| H  | -3.18360300 | 4.27217800  | -0.69070500 |
| H  | 0.02202200  | 4.25576100  | -0.69908300 |
| H  | 3.22743700  | 4.23653000  | -0.69544600 |
| H  | 4.02615500  | 0.19705900  | 1.47332200  |
| H  | 4.48517800  | 3.00214100  | 1.83587100  |
| Ga | -0.00086000 | 0.04591900  | -0.94615100 |
| Mg | 0.03210100  | 2.39004800  | 1.04624100  |

### B\_Mg1

HF=-2047.148989

|    |             |             |             |
|----|-------------|-------------|-------------|
| Ga | -3.95050300 | -0.24784900 | 3.30092900  |
| Ga | -0.95567500 | 0.96682400  | 3.06838400  |
| N  | -2.01760700 | -0.64194200 | 3.19529600  |
| N  | -4.28605700 | 1.57799400  | 3.26060800  |
| Ga | -4.33182500 | -3.04038200 | 1.59594600  |
| Ga | -1.43110900 | -1.64020000 | 1.58204000  |
| Ga | -1.84797200 | -4.37179800 | -0.09411200 |
| N  | -2.41070500 | -3.33708600 | 1.50552000  |
| N  | -4.70632600 | -1.13354100 | 1.58075700  |
| N  | -5.12692300 | -3.84364600 | -0.09899900 |
| Ga | -3.49406600 | 2.54642300  | 1.88788200  |
| Ga | -3.03096200 | 5.27043000  | 0.30709500  |
| N  | -1.63193100 | 2.09820000  | 1.74493200  |
| N  | -1.16077600 | 4.91565700  | 0.15285400  |
| N  | -3.85088400 | 4.36944900  | 1.72543800  |
| Ga | -3.90875100 | -0.24496300 | 0.04373300  |
| Ga | -3.43044700 | 2.53848500  | -1.47052800 |
| Ga | -4.31330900 | -2.98599700 | -1.71686700 |
| Ga | -3.87781700 | -0.22964900 | -3.23506600 |
| Ga | -1.03206400 | 1.19014500  | 0.09513400  |
| Ga | -0.58180800 | 3.98393400  | -1.45420200 |
| Ga | -1.40039300 | -1.54010700 | -1.60885500 |
| Ga | -0.98997600 | 1.28139000  | -3.14038200 |

|    |             |             |             |
|----|-------------|-------------|-------------|
| N  | -2.00443300 | -0.59245000 | 0.00947500  |
| N  | -1.55801200 | 2.20409400  | -1.49041200 |
| N  | -2.39237400 | -3.25353700 | -1.64878100 |
| N  | -1.96451400 | -0.48912100 | -3.16919000 |
| N  | -4.27156500 | 1.65883700  | 0.04481500  |
| N  | -3.83713500 | 4.45148600  | -1.49069800 |
| N  | -4.69229200 | -1.05130900 | -1.63451300 |
| N  | -4.25767400 | 1.74117500  | -3.16993900 |
| Ga | 1.21662300  | -1.12386700 | 3.23579200  |
| Ga | 4.11827500  | 0.27180800  | 3.26477500  |
| N  | 3.16362100  | -1.37941200 | 3.25279400  |
| N  | 0.82697000  | 0.70814900  | 3.14803800  |
| Ga | 0.83299200  | -3.84948200 | 1.55968100  |
| Ga | 3.69822200  | -2.43939900 | 1.58507100  |
| Ga | 3.27787700  | -5.14967300 | -0.09460800 |
| N  | 2.73958100  | -4.12415300 | 1.53940800  |
| N  | 0.46016100  | -1.93990500 | 1.56354300  |
| N  | 0.05809400  | -4.60568100 | -0.09470400 |
| Ga | 1.66714400  | 1.73511100  | 1.79657800  |
| Ga | 2.10155900  | 4.43283900  | 0.25567400  |
| Ga | 4.55298300  | 3.06315500  | 1.72960000  |
| N  | 3.60004100  | 1.40732200  | 1.87074300  |
| N  | 4.03829500  | 4.10727700  | 0.23472500  |
| N  | 1.40652300  | 3.54842800  | 1.72717300  |
| Ga | 1.25567000  | -1.03072800 | 0.02610900  |
| Ga | 1.71781700  | 1.73278900  | -1.49108600 |
| Ga | 0.85505900  | -3.76346400 | -1.70007000 |
| Ga | 1.28000600  | -1.00334900 | -3.21120500 |
| Ga | 4.13305700  | 0.35306000  | 0.04907300  |
| Ga | 4.56774900  | 3.14553300  | -1.48603300 |
| Ga | 3.71260200  | -2.35735800 | -1.63008500 |
| Ga | 4.14747500  | 0.43494500  | -3.16568600 |
| N  | 3.14309600  | -1.37265400 | 0.03858300  |
| N  | 3.58548800  | 1.41128100  | -1.46602400 |
| N  | 2.75131600  | -4.06205000 | -1.66037200 |
| N  | 3.17422100  | -1.30586800 | -3.18041000 |
| N  | 0.87621400  | 0.87644500  | 0.05651500  |
| N  | 1.32658800  | 3.63278200  | -1.45540700 |
| N  | 0.48374500  | -1.83139500 | -1.59763300 |
| N  | 0.90824200  | 0.93895700  | -3.12014400 |
| H  | -3.34202800 | 6.75259600  | 0.17910600  |
| H  | -0.64357700 | 5.80807500  | 0.16715000  |
| H  | 1.83588700  | 5.94807500  | 0.18179900  |
| H  | 4.53442600  | 5.00333500  | 0.16955000  |
| H  | 6.08512300  | 2.82555800  | 1.72966500  |
| H  | 5.65039500  | 0.03287700  | 3.26536000  |
| H  | 5.22993000  | -2.67743200 | 1.58579500  |
| H  | 5.66466600  | 0.11499900  | 0.05023700  |
| H  | 6.09936600  | 2.90743800  | -1.48539500 |
| H  | 5.67898800  | 0.19698900  | -3.16503600 |
| H  | 5.24428200  | -2.59546400 | -1.62949000 |
| H  | 4.80955300  | -5.38788800 | -0.09387600 |
| H  | -5.27447400 | 1.73041600  | 3.25974700  |
| H  | -4.83980700 | 4.52332200  | 1.72405200  |



|    |             |             |             |
|----|-------------|-------------|-------------|
| H  | -4.82525400 | 4.60522300  | -1.49098100 |
| H  | -5.26007900 | 1.81275700  | 0.04464000  |
| H  | -5.69478500 | -0.97963800 | 1.58018000  |
| H  | -5.24557000 | 1.89470000  | -3.17064800 |
| H  | -5.68032400 | -0.89769500 | -1.63501000 |
| H  | -6.11506000 | -3.69017800 | -0.09945300 |
| H  | -4.94881100 | -3.59730800 | -2.96883400 |
| H  | -4.51406300 | -0.80493800 | -4.50436800 |
| H  | -1.69787500 | -0.99157200 | -4.04654000 |
| H  | -2.13264800 | -3.78403800 | -2.51094500 |
| H  | 0.66366300  | -1.60956100 | -4.50174100 |
| H  | 0.22895200  | -4.40196500 | -2.96617000 |
| H  | 3.48004300  | -1.79616000 | -4.04384900 |
| H  | 3.04531400  | -4.58864900 | -2.50828100 |
| H  | 2.55012100  | -6.51782600 | -0.13277100 |
| H  | -4.94730500 | -4.82716400 | -0.12321100 |
| H  | -2.62759700 | -5.71306800 | -0.13541500 |
| H  | 0.23045700  | -5.63178900 | -0.12055800 |
| H  | -3.85665800 | 2.17799300  | -3.97541300 |
| H  | -1.41543600 | 2.07316500  | -4.41709800 |
| H  | 1.32104100  | 1.37335100  | -3.97274500 |
| H  | 3.76228500  | 1.26856800  | -4.41455100 |
| H  | -3.43636100 | 4.88853200  | -2.29572700 |
| H  | -0.99506200 | 4.78367300  | -2.73750300 |
| H  | 1.74140900  | 4.08393200  | -2.29307200 |
| H  | 4.18267700  | 3.97903600  | -2.73492400 |
| H  | -4.55411400 | -1.03337900 | 4.46055700  |
| H  | -1.73402600 | -1.19686800 | 4.01933700  |
| H  | 0.62357800  | -1.83797600 | 4.46337700  |
| H  | 3.44396000  | -2.00183600 | 4.02179000  |
| H  | 3.02363200  | -4.71231900 | 2.34220900  |
| H  | 0.20325200  | -4.54853200 | 2.78389300  |
| H  | -2.15432700 | -3.90771700 | 2.33964900  |
| H  | -4.97455700 | -3.74383400 | 2.78125000  |
| Mg | -0.52879000 | 3.84308000  | 1.74835800  |

## B\_Mg2

HF=-2047.107601

|    |             |             |             |
|----|-------------|-------------|-------------|
| Ga | -3.93824200 | -0.46331400 | 3.26258400  |
| Ga | -1.00025300 | 0.92868500  | 3.10366900  |
| N  | -2.00019600 | -0.74546800 | 3.17860800  |
| N  | -4.36797000 | 1.34892200  | 3.20046700  |
| Ga | -4.14252800 | -3.28201500 | 1.58007100  |
| Ga | -1.31988100 | -1.72370100 | 1.59850300  |
| Ga | -1.57008500 | -4.49229000 | -0.06577400 |
| N  | -2.21094500 | -3.47279900 | 1.51409900  |
| N  | -4.62206000 | -1.39582200 | 1.54138200  |
| N  | -4.87643600 | -4.13917900 | -0.11765100 |
| Ga | -3.62415200 | 2.35098400  | 1.83238700  |
| Ga | -3.30501600 | 5.07385300  | 0.22483200  |
| N  | -1.70359100 | 2.06832000  | 1.70605000  |
| N  | -1.39090400 | 4.81034900  | 0.11451700  |
| N  | -4.06420000 | 4.14613800  | 1.64465900  |
| Ga | -3.86100000 | -0.48815300 | 0.00467300  |

|    |             |             |             |
|----|-------------|-------------|-------------|
| Ga | -3.51378600 | 2.30385100  | -1.53554900 |
| Ga | -4.08891800 | -3.25802200 | -1.73259000 |
| Ga | -3.78316100 | -0.49685400 | -3.27221300 |
| Ga | -1.04836900 | 1.06231800  | 0.04220400  |
| Ga | -0.73425200 | 3.87477900  | -1.53264300 |
| Ga | -1.25539100 | -1.66191600 | -1.60302200 |
| Ga | -0.97894700 | 1.15960000  | -3.16616700 |
| N  | -1.94787000 | -0.72414400 | 0.00117200  |
| N  | -1.62990800 | 2.08336300  | -1.52936300 |
| N  | -2.16101900 | -3.41823300 | -1.64010500 |
| N  | -1.86202200 | -0.64883100 | -3.18049200 |
| N  | -4.31830700 | 1.40242300  | -0.01550900 |
| N  | -4.01504100 | 4.20062100  | -1.57180600 |
| N  | -4.57294900 | -1.34110600 | -1.67407900 |
| N  | -4.26949400 | 1.45711900  | -3.23042900 |
| Ga | 1.26527800  | -1.03734200 | 3.29381500  |
| Ga | 4.09357100  | 0.49509600  | 3.31592800  |
| N  | 3.22640500  | -1.20979900 | 3.30283200  |
| N  | 0.75204100  | 0.75171100  | 3.29506300  |
| Ga | 1.05754200  | -3.80324700 | 1.61728800  |
| Ga | 3.83967800  | -2.24932600 | 1.65710000  |
| Ga | 3.58551500  | -4.99281800 | -0.00192500 |
| N  | 2.97376900  | -3.98569400 | 1.61346200  |
| N  | 0.57790400  | -1.91668400 | 1.59529400  |
| N  | 0.34208600  | -4.62224400 | -0.04354700 |
| Ga | 1.89062000  | 4.53615400  | 0.21517400  |
| Ga | 4.39693900  | 3.29229700  | 1.76003800  |
| N  | 3.59445900  | 1.60846100  | 1.90973600  |
| N  | 3.82314500  | 4.30397700  | 0.26400800  |
| N  | 1.08054700  | 3.68238100  | 1.65255900  |
| Ga | 1.34304700  | -0.98958900 | 0.05331100  |
| Ga | 1.67430600  | 1.76255100  | -1.47872200 |
| Ga | 1.11422800  | -3.75965300 | -1.64790700 |
| Ga | 1.40758700  | -0.99308400 | -3.17767300 |
| Ga | 4.14300800  | 0.54871300  | 0.10003500  |
| Ga | 4.44691400  | 3.34723100  | -1.45593400 |
| Ga | 3.88913400  | -2.19475400 | -1.55831700 |
| Ga | 4.19283500  | 0.60328400  | -3.11486500 |
| N  | 3.24534400  | -1.22855300 | 0.08836100  |
| N  | 3.55708500  | 1.56827400  | -1.43579000 |
| N  | 3.02137000  | -3.94915700 | -1.58463200 |
| N  | 3.31401300  | -1.18625600 | -3.12554000 |
| N  | 0.82356100  | 0.85971200  | -0.00640900 |
| N  | 1.17887200  | 3.65854700  | -1.47294600 |
| N  | 0.63408800  | -1.85818900 | -1.57485000 |
| N  | 0.92790500  | 0.93223600  | -3.11888800 |
| H  | -3.66436000 | 6.53948400  | 0.08190400  |
| H  | -0.91929300 | 5.74082000  | 0.11081100  |
| H  | 1.54863500  | 6.01381000  | 0.15318700  |
| H  | 4.29393100  | 5.21478100  | 0.18174100  |
| H  | 5.93964700  | 3.13704700  | 1.78036400  |
| H  | 5.63601500  | 0.33863300  | 3.33702300  |
| H  | 5.38176000  | -2.40489400 | 1.67807700  |
| H  | 5.68539900  | 0.39333000  | 0.12166400  |

|    |             |             |             |
|----|-------------|-------------|-------------|
| H  | 5.98887800  | 3.19146200  | -1.43495100 |
| H  | 5.73471200  | 0.44781200  | -3.09390300 |
| H  | 5.43117000  | -2.35040800 | -1.53741900 |
| H  | 5.12760500  | -5.14857500 | 0.01910300  |
| H  | -5.36312300 | 1.44811000  | 3.18670200  |
| H  | -5.05958000 | 4.24674000  | 1.62988900  |
| H  | -5.01006300 | 4.30119600  | -1.58523700 |
| H  | -5.31371200 | 1.50295100  | -0.02867400 |
| H  | -5.61722900 | -1.29521500 | 1.52777800  |
| H  | -5.26411600 | 1.55743600  | -3.24423200 |
| H  | -5.56771500 | -1.24071800 | -1.68766300 |
| H  | -5.87127400 | -4.03894500 | -0.13118400 |
| H  | -4.67653000 | -3.90879000 | -2.98735800 |
| H  | -4.37293800 | -1.11066200 | -4.54381400 |
| H  | -1.55664900 | -1.14209300 | -4.05109800 |
| H  | -1.86024400 | -3.94028000 | -2.49459500 |
| H  | 0.83999000  | -1.63656500 | -4.47260400 |
| H  | 0.53642800  | -4.43472900 | -2.91610600 |
| H  | 3.65646900  | -1.66795200 | -3.97981300 |
| H  | 3.35289800  | -4.46617100 | -2.42334100 |
| H  | 2.93249700  | -6.39828200 | -0.03581100 |
| H  | -4.64417500 | -5.11186000 | -0.13050000 |
| H  | -2.28042200 | -5.87222100 | -0.10703800 |
| H  | 0.56877700  | -5.63778000 | -0.05926700 |
| H  | -3.88258900 | 1.90772700  | -4.03519300 |
| H  | -1.43401600 | 1.93001600  | -4.44708600 |
| H  | 1.33033200  | 1.38183700  | -3.96393000 |
| H  | 3.77890400  | 1.40413800  | -4.37591600 |
| H  | -3.62856200 | 4.65149400  | -2.37622200 |
| H  | -1.17984600 | 4.67378900  | -2.78814400 |
| H  | 1.58453300  | 4.12547000  | -2.30504900 |
| H  | 4.03307900  | 4.14780100  | -2.71698800 |
| H  | -4.51081800 | -1.26253700 | 4.42181900  |
| H  | -1.68069300 | -1.27854000 | 4.01531700  |
| H  | 0.70216700  | -1.78846300 | 4.49323100  |
| H  | 3.53243400  | -1.80473600 | 4.08645300  |
| H  | 3.27833000  | -4.54841300 | 2.42752900  |
| H  | 0.44804500  | -4.53216300 | 2.83436300  |
| H  | -1.93482400 | -4.02253500 | 2.35638300  |
| H  | -4.76497100 | -4.00619300 | 2.76313600  |
| Ga | -0.68508700 | 3.71235600  | 1.54728200  |
| Mg | 1.58934500  | 1.77794200  | 1.81764000  |

### B\_Mg3

HF=-2047.154615

|    |            |             |             |
|----|------------|-------------|-------------|
| Ga | 3.97086200 | -0.26516400 | -3.26472600 |
| Ga | 0.99142500 | 1.01822300  | -3.06464800 |
| N  | 2.02366000 | -0.61457200 | -3.18621500 |
| N  | 4.32134400 | 1.56148400  | -3.19072900 |
| Ga | 4.30334500 | -3.09252100 | -1.62434700 |
| Ga | 1.43179200 | -1.65917500 | -1.57955700 |
| Ga | 1.80314500 | -4.42781000 | 0.02376100  |
| N  | 2.38211100 | -3.37246200 | -1.55512700 |
| N  | 4.70310500 | -1.19086300 | -1.56882000 |

|    |             |             |             |
|----|-------------|-------------|-------------|
| N  | 5.08504100  | -3.94157100 | 0.05310700  |
| Ga | 3.54253500  | 2.52848100  | -1.82831800 |
| Ga | 3.12989400  | 5.19345000  | -0.15526900 |
| N  | 1.65208200  | 2.22903900  | -1.79665500 |
| N  | 1.21004400  | 4.85245100  | -0.05897200 |
| N  | 3.91291800  | 4.32376000  | -1.59715300 |
| Ga | 3.90549300  | -0.34141000 | -0.01050900 |
| Ga | 3.45060300  | 2.41683000  | 1.56917000  |
| Ga | 4.27102400  | -3.10841000 | 1.68565600  |
| Ga | 3.86400300  | -0.38448800 | 3.26068800  |
| Ga | 0.63607700  | 3.85062800  | 1.61638400  |
| Ga | 1.39052000  | -1.63151700 | 1.58318500  |
| Ga | 1.00452800  | 1.16287700  | 3.19073800  |
| N  | 2.04557500  | -0.73335200 | -0.00267300 |
| N  | 1.59593000  | 2.16063700  | 1.62854400  |
| N  | 2.35178300  | -3.36079100 | 1.60627200  |
| N  | 1.94912900  | -0.62075900 | 3.18184900  |
| N  | 4.29454500  | 1.57262600  | 0.02612800  |
| N  | 3.88658300  | 4.33607900  | 1.62018500  |
| N  | 4.67675600  | -1.17840600 | 1.64740400  |
| N  | 4.26856400  | 1.58511400  | 3.24166200  |
| Ga | -1.18965300 | -1.06633500 | -3.23702300 |
| Ga | -4.09739400 | 0.35488900  | -3.25557000 |
| N  | -3.14443900 | -1.28573700 | -3.26909700 |
| N  | -0.79261100 | 0.76914500  | -3.13087100 |
| Ga | -0.86449900 | -3.83804500 | -1.62822400 |
| Ga | -3.71611700 | -2.39695500 | -1.63386700 |
| Ga | -3.33442900 | -5.14796400 | -0.01209700 |
| N  | -2.77771200 | -4.09191600 | -1.62230300 |
| N  | -0.47119800 | -1.93307900 | -1.59073400 |
| N  | -0.10878000 | -4.64179100 | 0.01126000  |
| Ga | -1.61845700 | 1.70118400  | -1.71024900 |
| Ga | -2.03610400 | 4.42927200  | -0.09264100 |
| Ga | -4.50551400 | 3.11717100  | -1.66206600 |
| N  | -3.55331200 | 1.50907900  | -1.88173800 |
| N  | -3.96205700 | 4.13547000  | -0.16927400 |
| N  | -1.21666800 | 3.53267400  | -1.52656000 |
| Ga | -1.27330400 | -1.04713900 | -0.03506800 |
| Ga | -1.70821700 | 1.65909100  | 1.53119000  |
| Ga | -0.89882700 | -3.82349500 | 1.63133500  |
| Ga | -1.29426600 | -1.09572800 | 3.19857800  |
| Ga | -4.12463900 | 0.36613000  | -0.03911800 |
| Ga | -4.53283400 | 3.12983700  | 1.55475100  |
| Ga | -3.74272700 | -2.38471300 | 1.58221300  |
| Ga | -4.15114000 | 0.37841800  | 3.17660200  |
| N  | -3.17192100 | -1.37385400 | -0.06596000 |
| N  | -3.59226900 | 1.39848500  | 1.50196700  |
| N  | -2.80184100 | -4.10018800 | 1.57891200  |
| N  | -3.19818600 | -1.37107900 | 3.15687900  |
| N  | -0.97361700 | 0.84351500  | -0.04297700 |
| N  | -1.28747400 | 3.57776500  | 1.55102500  |
| N  | -0.50825400 | -1.89498300 | 1.57062500  |
| N  | -0.90901500 | 0.84733900  | 3.15179300  |
| H  | 3.42547800  | 6.67874100  | -0.00086900 |

|    |             |             |             |
|----|-------------|-------------|-------------|
| H  | 0.71603800  | 5.76581500  | -0.02004500 |
| H  | -1.76134700 | 5.93561200  | -0.04109900 |
| H  | -4.47101100 | 5.02248000  | -0.05986500 |
| H  | -6.04072100 | 2.89758000  | -1.67295300 |
| H  | -5.63240100 | 0.13398300  | -3.26750400 |
| H  | -5.25046500 | -2.61693500 | -1.64576800 |
| H  | -5.65876000 | 0.14647300  | -0.05146600 |
| H  | -6.06704300 | 2.90975800  | 1.54299700  |
| H  | -5.68533600 | 0.15868300  | 3.16477800  |
| H  | -5.27705900 | -2.60467400 | 1.57045000  |
| H  | -4.86875700 | -5.36799500 | -0.02392000 |
| H  | 5.31168400  | 1.70201300  | -3.18280300 |
| H  | 4.90339500  | 4.46581600  | -1.58808700 |
| H  | 4.87663300  | 4.47799200  | 1.62757500  |
| H  | 5.28509900  | 1.71468600  | 0.03308500  |
| H  | 5.69329300  | -1.04859600 | -1.56107800 |
| H  | 5.25822500  | 1.72682100  | 3.24945800  |
| H  | 5.66657200  | -1.03641100 | 1.65506600  |
| H  | 6.07485100  | -3.79980000 | 0.06071400  |
| H  | 4.89802100  | -3.75557500 | 2.92693300  |
| H  | 4.48970900  | -0.99230700 | 4.52126300  |
| H  | 1.67337400  | -1.13571400 | 4.04860800  |
| H  | 2.08173400  | -3.89905100 | 2.45424900  |
| H  | -0.69705900 | -1.73554800 | 4.48115400  |
| H  | -0.28876500 | -4.49885500 | 2.88680000  |
| H  | -3.51350600 | -1.87894100 | 4.00845800  |
| H  | -3.10519500 | -4.64229600 | 2.41412800  |
| H  | -2.62289700 | -6.52509300 | -0.00093700 |
| H  | 4.89376600  | -4.92315900 | 0.05520500  |
| H  | 2.56386900  | -5.78176700 | 0.03917500  |
| H  | -0.29300400 | -5.66642900 | 0.01508500  |
| H  | 3.86945100  | 2.00895200  | 4.05486800  |
| H  | 1.42541000  | 1.92336600  | 4.48481700  |
| H  | -1.31730600 | 1.26575200  | 4.01472900  |
| H  | -3.76137800 | 1.18016100  | 4.44472200  |
| H  | 3.48789300  | 4.76012000  | 2.43302400  |
| H  | 1.04368100  | 4.67452800  | 2.86303000  |
| H  | -1.69900900 | 4.01679400  | 2.39297400  |
| H  | -4.14305600 | 3.93119700  | 2.82295100  |
| H  | 4.56400400  | -1.02638300 | -4.44651300 |
| H  | 1.74024300  | -1.16621400 | -4.01959900 |
| H  | -0.62285400 | -1.76959600 | -4.48670900 |
| H  | -3.39565700 | -1.86770100 | -4.07661100 |
| H  | -3.06504400 | -4.66075400 | -2.43783600 |
| H  | -0.24115000 | -4.52069100 | -2.86495300 |
| H  | 2.12190400  | -3.91749700 | -2.39777500 |
| H  | 4.94567800  | -3.77738000 | -2.82483300 |
| Mg | 1.05486400  | 1.09860600  | -0.02962300 |
| Ga | 0.57293200  | 3.73438800  | -1.48520800 |

## 2A\_GaN

HF=-1059.8083879

|    |             |             |            |
|----|-------------|-------------|------------|
| Ga | -1.47003500 | 2.40922700  | 1.89073400 |
| Ga | -1.48851900 | -2.75126500 | 1.77674100 |

|    |             |             |             |
|----|-------------|-------------|-------------|
| N  | -1.54108700 | 0.61694300  | 1.59510400  |
| Ga | -3.16517900 | -0.13113000 | 1.06056200  |
| N  | -3.24989100 | 3.10785700  | 1.01255400  |
| N  | -3.10526000 | -2.07422200 | 1.05383200  |
| Ga | -3.43246600 | 2.40247900  | -0.84168200 |
| Ga | -3.30734200 | -2.76197900 | -0.87604900 |
| N  | -3.31627600 | 0.49931300  | -0.83229300 |
| Ga | 1.56855300  | 2.57850300  | 1.97736400  |
| Ga | 1.71751400  | -2.69764000 | 1.52893200  |
| N  | 1.66645400  | 0.51737000  | 1.59414800  |
| Ga | -0.02221000 | -0.10713000 | 0.79746300  |
| Ga | 3.22682600  | -0.07545200 | 0.50708300  |
| N  | -0.05260600 | 3.16275500  | 0.76884700  |
| N  | -0.00766000 | -2.03079000 | 0.77249400  |
| N  | 3.14426800  | 3.21543700  | 0.51801400  |
| N  | 3.19485200  | -1.99071400 | 0.48442100  |
| Ga | -0.18360600 | 2.45613800  | -1.02862300 |
| Ga | -0.10080200 | -2.70853300 | -1.12432200 |
| Ga | 3.06379500  | 2.53075800  | -1.31606900 |
| Ga | 3.10536700  | -2.65467900 | -1.37238900 |
| N  | -0.11720300 | 0.55813300  | -1.07137400 |
| N  | 3.01035500  | 0.61340800  | -1.31701200 |
| Ga | -1.78682100 | -0.12774300 | -1.90528300 |
| Ga | 1.37487600  | -0.07810700 | -2.16605800 |
| N  | -1.86956500 | 3.15377200  | -1.87934500 |
| N  | -1.76591800 | -2.04432900 | -1.88645300 |
| N  | 1.30904900  | 3.18497400  | -2.09313500 |
| N  | 1.39690000  | -1.98893000 | -2.13183100 |
| H  | -1.46469800 | -4.30144500 | 1.76803800  |
| H  | 1.74355500  | -4.24768500 | 1.51951500  |
| H  | 4.00135700  | 2.89354500  | 0.92161000  |
| H  | 4.50129100  | 0.48747700  | 1.12758500  |
| H  | 4.08648100  | -2.33838200 | 0.88839200  |
| H  | -3.93868900 | -2.47286600 | 1.50978700  |
| H  | -4.40574600 | 0.33820900  | 1.81741000  |
| H  | -4.02369100 | 2.75926700  | 1.54320900  |
| H  | 4.20428800  | 3.11987200  | -2.15072000 |
| H  | 3.82809000  | 0.29217000  | -1.87959300 |
| H  | 4.29739300  | -2.09734000 | -2.19155300 |
| H  | 3.14385900  | -4.20410900 | -1.39199200 |
| H  | -0.07609000 | -4.25817100 | -1.13753700 |
| H  | -4.62897400 | -2.24687800 | -1.50029000 |
| H  | -3.29668200 | -4.31202200 | -0.89320800 |
| H  | 1.26834700  | 2.88127900  | -3.07049300 |
| H  | -1.93882300 | 2.82747400  | -2.82220400 |
| H  | 1.26933100  | 0.46254600  | -3.59891500 |
| H  | -1.94061700 | 0.40868800  | -3.35039900 |
| H  | 1.35345500  | -2.35881400 | -3.10441900 |
| H  | -1.85362500 | -2.41252300 | -2.85612000 |
| H  | 1.31814000  | 4.20714100  | -2.11611600 |
| H  | -1.88530800 | 4.15348900  | -1.86808600 |
| H  | 3.12627500  | 4.21539500  | 0.52340100  |
| H  | -0.06905700 | 4.16303400  | 0.77703500  |
| H  | -3.26506700 | 4.10850100  | 1.01856400  |

|   |             |             |             |
|---|-------------|-------------|-------------|
| H | -4.19722100 | 0.15791100  | -1.25822000 |
| H | -4.70452100 | 2.97058200  | -1.46081600 |
| C | 1.86005700  | -0.10150300 | 2.91480700  |
| O | 2.12603100  | 0.61431300  | 3.89813300  |
| O | 1.73833400  | -1.44242000 | 2.98342100  |
| H | -1.09917200 | -2.25334400 | 4.27127400  |
| H | -0.40244000 | -2.00285200 | 4.14730300  |

### TS2A\_GaN

HF=-1059.560266

|    |             |             |             |
|----|-------------|-------------|-------------|
| Ga | -1.37744000 | 2.43413300  | 1.75376800  |
| Ga | -1.58371400 | -2.68416400 | 1.79815200  |
| N  | -1.49713300 | 0.66929400  | 1.58802600  |
| Ga | -3.17297000 | -0.03003600 | 1.09859100  |
| N  | -3.09832600 | 3.24664600  | 1.06228700  |
| N  | -3.19283200 | -1.94246500 | 1.06105400  |
| Ga | -3.33898200 | 2.54246500  | -0.81385400 |
| Ga | -3.43276200 | -2.61166400 | -0.83272600 |
| N  | -3.29966000 | 0.64923400  | -0.78655500 |
| Ga | 1.76932000  | 2.61330000  | 2.07851400  |
| Ga | 1.61820400  | -2.76859000 | 1.51225500  |
| N  | 1.69182400  | 0.41546100  | 1.64693700  |
| Ga | -0.01049700 | -0.13731400 | 0.77940800  |
| Ga | 3.22298300  | -0.19939400 | 0.49167800  |
| N  | 0.09499300  | 3.16328700  | 0.78038800  |
| N  | -0.05752400 | -2.03532400 | 0.69704200  |
| N  | 3.28706800  | 3.07826200  | 0.49177700  |
| N  | 3.10848900  | -2.10994800 | 0.48946200  |
| Ga | -0.07189600 | 2.46171700  | -1.02673900 |
| Ga | -0.23009300 | -2.69654200 | -1.11913700 |
| Ga | 3.16082800  | 2.40374100  | -1.33405800 |
| Ga | 2.97232400  | -2.78117700 | -1.40534500 |
| N  | -0.09848000 | 0.57492600  | -1.06544100 |
| N  | 3.01938200  | 0.48695300  | -1.33661000 |
| Ga | -1.81014900 | -0.05277400 | -1.88056500 |
| Ga | 1.34763000  | -0.13799400 | -2.17880400 |
| N  | -1.75214600 | 3.23800900  | -1.84581900 |
| N  | -1.87191400 | -1.95637300 | -1.86593700 |
| N  | 1.42209000  | 3.13198900  | -2.09744300 |
| N  | 1.29404900  | -2.04080000 | -2.14889700 |
| H  | -1.62727000 | -4.23408100 | 1.78730600  |
| H  | 1.57716900  | -4.31885900 | 1.50065100  |
| H  | 4.13475800  | 2.71910400  | 0.88469400  |
| H  | 4.53217200  | 0.29311900  | 1.08145700  |
| H  | 3.99281100  | -2.51140000 | 0.84400800  |
| H  | -4.02259700 | -2.29966800 | 1.56083900  |
| H  | -4.36376100 | 0.52840900  | 1.87747600  |
| H  | -3.88054600 | 2.93118200  | 1.60170600  |
| H  | 4.31090300  | 2.94169800  | -2.18958400 |
| H  | 3.81582900  | 0.13244900  | -1.91744100 |
| H  | 4.17750700  | -2.27449800 | -2.23797500 |
| H  | 2.94337300  | -4.33076200 | -1.42730600 |
| H  | -0.27263800 | -4.24585300 | -1.13455700 |
| H  | -4.73815500 | -2.03877700 | -1.44053900 |

|   |             |             |             |
|---|-------------|-------------|-------------|
| H | -3.48942700 | -4.16071700 | -0.85192400 |
| H | 1.35665500  | 2.83206200  | -3.07458700 |
| H | -1.84668000 | 2.91668300  | -2.78817500 |
| H | 1.24663100  | 0.41649300  | -3.60596400 |
| H | -1.95945700 | 0.50115900  | -3.31928300 |
| H | 1.21439600  | -2.40672800 | -3.11597300 |
| H | -1.98885500 | -2.32200300 | -2.82953900 |
| H | 1.47512800  | 4.15286300  | -2.11924300 |
| H | -1.72448800 | 4.23748700  | -1.83312800 |
| H | 3.31313800  | 4.07830100  | 0.49858200  |
| H | 0.12164300  | 4.16386400  | 0.79028000  |
| H | -3.07054900 | 4.24724700  | 1.06967500  |
| H | -4.19982300 | 0.34467300  | -1.20064400 |
| H | -4.58721500 | 3.17701700  | -1.39374600 |
| C | 1.82191300  | -0.18134300 | 2.92646300  |
| O | 2.31238100  | 0.33284300  | 3.92763200  |
| O | 1.32158900  | -1.53609000 | 3.01722200  |
| H | 0.12779100  | -1.73661900 | 3.30126300  |
| H | -0.86720200 | -2.03079000 | 3.31685600  |

### 3A\_GaN

HF=-1059.621567

|    |             |             |             |
|----|-------------|-------------|-------------|
| Ga | -1.36417500 | 2.45441800  | 1.68082900  |
| Ga | -1.60636900 | -2.65545000 | 1.82967600  |
| N  | -1.48536700 | 0.70649700  | 1.56573900  |
| Ga | -3.17738600 | -0.02092700 | 1.12856400  |
| N  | -3.05362100 | 3.28758000  | 1.05823100  |
| N  | -3.23668700 | -1.90986100 | 1.04193900  |
| Ga | -3.32361600 | 2.56308100  | -0.81772300 |
| Ga | -3.47468500 | -2.58083300 | -0.78758500 |
| N  | -3.30068500 | 0.68031400  | -0.76896600 |
| Ga | 1.85287400  | 2.74704200  | 2.06664900  |
| Ga | 1.59162900  | -2.78063100 | 1.51959800  |
| N  | 1.74120400  | 0.40268500  | 1.66858800  |
| Ga | -0.01957000 | -0.14472700 | 0.79667500  |
| Ga | 3.23099100  | -0.26204300 | 0.45832100  |
| N  | 0.13608700  | 3.16228900  | 0.75255700  |
| N  | -0.02523000 | -2.01999400 | 0.72156000  |
| N  | 3.32448600  | 3.03581700  | 0.44036900  |
| N  | 3.08671100  | -2.15799500 | 0.46353200  |
| Ga | -0.04972900 | 2.44134500  | -1.05127900 |
| Ga | -0.27571300 | -2.70769100 | -1.09768600 |
| Ga | 3.17636300  | 2.34704000  | -1.37813600 |
| Ga | 2.92335500  | -2.83406700 | -1.40774300 |
| N  | -0.09469700 | 0.55992200  | -1.05945400 |
| N  | 3.01236400  | 0.43305900  | -1.36090200 |
| Ga | -1.83337200 | -0.05340800 | -1.86546100 |
| Ga | 1.32332900  | -0.18224600 | -2.18909300 |
| N  | -1.73022200 | 3.23957700  | -1.85989100 |
| N  | -1.90532200 | -1.95013900 | -1.83917400 |
| N  | 1.44041800  | 3.09242500  | -2.13489400 |
| N  | 1.25176100  | -2.07888100 | -2.14605400 |
| H  | -1.66906700 | -4.20480200 | 1.83137400  |
| H  | 1.53195900  | -4.33163700 | 1.52116100  |



|   |             |             |             |
|---|-------------|-------------|-------------|
| H | 4.17080000  | 2.66956700  | 0.82964300  |
| H | 4.53989500  | 0.24024700  | 1.04263100  |
| H | 3.96434700  | -2.55900900 | 0.83168600  |
| H | -4.04209200 | -2.24274800 | 1.60788200  |
| H | -4.34606700 | 0.59170900  | 1.90462100  |
| H | -3.83557400 | 2.98612500  | 1.60608000  |
| H | 4.32585700  | 2.86578300  | -2.24757400 |
| H | 3.79855700  | 0.06518600  | -1.94928000 |
| H | 4.12802500  | -2.34849700 | -2.25346500 |
| H | 2.87508000  | -4.38300400 | -1.41709200 |
| H | -0.33725900 | -4.25613600 | -1.10050800 |
| H | -4.77757000 | -1.99661000 | -1.38994500 |
| H | -3.55047800 | -4.12912000 | -0.79402200 |
| H | 1.36376100  | 2.78563700  | -3.10907100 |
| H | -1.83599300 | 2.91203100  | -2.79892600 |
| H | 1.21998800  | 0.36752500  | -3.62038400 |
| H | -1.98251300 | 0.49402000  | -3.30993400 |
| H | 1.15687400  | -2.45108500 | -3.10774500 |
| H | -2.04272800 | -2.32460600 | -2.79757800 |
| H | 1.50582100  | 4.11236300  | -2.16520500 |
| H | -1.69021600 | 4.23871400  | -1.85537800 |
| H | 3.36299500  | 4.03574400  | 0.43905200  |
| H | 0.17507400  | 4.16303400  | 0.75447900  |
| H | -3.01362200 | 4.28789200  | 1.05745600  |
| H | -4.20818600 | 0.38181300  | -1.17308600 |
| H | -4.56227000 | 3.21710400  | -1.38575600 |
| C | 1.84101300  | -0.03456900 | 2.94470200  |
| O | 1.94271000  | 0.49666100  | 4.04078400  |
| O | 1.81623600  | -1.59477800 | 3.06326400  |
| H | 1.70221000  | -1.83628100 | 4.00420900  |
| H | -1.36542300 | -1.99968700 | 3.28806000  |

### TS3A\_GaN

HF= -1059.48546

|    |             |             |             |
|----|-------------|-------------|-------------|
| Ga | -1.55211900 | 2.34045000  | 1.72460300  |
| Ga | -1.36897200 | -2.78889300 | 1.79083600  |
| N  | -1.58003900 | 0.59822400  | 1.50614300  |
| Ga | -3.17382400 | -0.25205400 | 1.08530600  |
| N  | -3.31348900 | 3.01768500  | 1.07544900  |
| N  | -3.02683800 | -2.16469800 | 1.07438100  |
| Ga | -3.50908700 | 2.30007700  | -0.80471800 |
| Ga | -3.23095800 | -2.84574400 | -0.83137800 |
| N  | -3.33788300 | 0.41424100  | -0.78576300 |
| Ga | 1.60360200  | 2.75120100  | 2.11046600  |
| Ga | 1.82880800  | -2.63914300 | 1.48953400  |
| N  | 1.56735900  | 0.44947400  | 1.70877600  |
| Ga | -0.04359200 | -0.15085200 | 0.77551300  |
| Ga | 3.20618400  | 0.00035100  | 0.55082800  |
| N  | -0.12396900 | 3.16657700  | 0.77852400  |
| N  | 0.09406000  | -2.04599200 | 0.69016100  |
| N  | 3.06436200  | 3.31424800  | 0.47506800  |
| N  | 3.26517700  | -1.89573700 | 0.41753300  |
| Ga | -0.24015300 | 2.44836500  | -1.02811000 |
| Ga | -0.03206400 | -2.69758200 | -1.13271700 |

|    |             |             |             |
|----|-------------|-------------|-------------|
| Ga | 2.98608500  | 2.62484600  | -1.34374900 |
| Ga | 3.16688400  | -2.54893200 | -1.43400700 |
| N  | -0.14060600 | 0.56369500  | -1.07440300 |
| N  | 2.97785800  | 0.70564600  | -1.33447500 |
| Ga | -1.80026100 | -0.17298700 | -1.88501500 |
| Ga | 1.36288500  | -0.03120000 | -2.18819000 |
| N  | -1.98419200 | 3.11250700  | -1.83884400 |
| N  | -1.73233700 | -2.07840900 | -1.86732800 |
| N  | 1.18811400  | 3.23768000  | -2.10538300 |
| N  | 1.42876400  | -1.93227400 | -2.16828100 |
| H  | -1.29999500 | -4.33791300 | 1.77655100  |
| H  | 1.90094400  | -4.18955300 | 1.47510600  |
| H  | 3.93781600  | 3.01706300  | 0.86324400  |
| H  | 4.51121100  | 0.62571600  | 1.05262500  |
| H  | 4.17571700  | -2.20991900 | 0.81136400  |
| H  | -3.83042000 | -2.58197800 | 1.56561800  |
| H  | -4.37445700 | 0.21323700  | 1.89026700  |
| H  | -4.06828300 | 2.64530300  | 1.61774200  |
| H  | 4.08262600  | 3.25777300  | -2.21131300 |
| H  | 3.79416800  | 0.41958900  | -1.94322600 |
| H  | 4.32792200  | -1.95415200 | -2.27095300 |
| H  | 3.25022300  | -4.09620100 | -1.45928900 |
| H  | 0.03799500  | -4.24555400 | -1.15150900 |
| H  | -4.57734700 | -2.36788800 | -1.43183900 |
| H  | -3.17510000 | -4.39472900 | -0.85382800 |
| H  | 1.13996700  | 2.93566200  | -3.08287100 |
| H  | -2.05966700 | 2.78697100  | -2.78149500 |
| H  | 1.20303200  | 0.51952800  | -3.61924500 |
| H  | -1.99934800 | 0.37070200  | -3.31757100 |
| H  | 1.37812800  | -2.29946600 | -3.13552000 |
| H  | -1.82136100 | -2.44805900 | -2.83415300 |
| H  | 1.16681400  | 4.25975000  | -2.12509500 |
| H  | -2.02911100 | 4.11133500  | -1.82402500 |
| H  | 3.01789700  | 4.31379700  | 0.48406100  |
| H  | -0.17003400 | 4.16694800  | 0.79076500  |
| H  | -3.35850300 | 4.01773900  | 1.08499200  |
| H  | -4.21230300 | 0.04786900  | -1.18897100 |
| H  | -4.80518700 | 2.84497200  | -1.37385100 |
| C  | 1.39111700  | -0.08274500 | 2.99875000  |
| O  | 1.42896800  | 0.44093900  | 4.10366000  |
| O  | 2.27335200  | -1.63708900 | 3.03596400  |
| H  | 2.21236200  | -1.93056800 | 3.96347600  |
| H  | -0.05133500 | -1.14740600 | 3.00331500  |

#### 4A\_GaN

HF= -1059.624733

|    |             |             |             |
|----|-------------|-------------|-------------|
| Ga | -1.37477500 | 2.44427300  | 1.73975900  |
| Ga | -1.71977100 | -2.67142800 | 1.61729000  |
| N  | -1.52224800 | 0.72387000  | 1.46679100  |
| Ga | -3.19583900 | 0.02664200  | 0.96062900  |
| N  | -3.00689500 | 3.33182200  | 1.05250300  |
| N  | -3.27996000 | -1.85683600 | 0.77964400  |
| Ga | -3.17840000 | 2.69946200  | -0.86574800 |
| Ga | -3.42759800 | -2.43215700 | -1.09792800 |

|    |             |             |             |
|----|-------------|-------------|-------------|
| N  | -3.19517100 | 0.81753100  | -0.91168400 |
| Ga | 1.80358200  | 2.52202000  | 2.29316900  |
| Ga | 1.48809000  | -2.85292000 | 1.48880500  |
| N  | 1.69105400  | 0.32892000  | 1.79276000  |
| Ga | -0.04193400 | -0.15245700 | 0.78378300  |
| Ga | 3.24272800  | -0.32919600 | 0.62517500  |
| N  | 0.19275100  | 3.15274300  | 0.92806500  |
| N  | -0.08031600 | -2.01977400 | 0.63932300  |
| N  | 3.39203800  | 2.97163800  | 0.79637300  |
| N  | 3.06039300  | -2.21438800 | 0.53717600  |
| Ga | 0.09672400  | 2.51874000  | -0.91681500 |
| Ga | -0.21861400 | -2.61334900 | -1.22665300 |
| Ga | 3.33698600  | 2.37459700  | -1.06191200 |
| Ga | 2.98978200  | -2.79395500 | -1.35517100 |
| N  | 0.02199700  | 0.64247500  | -1.03157700 |
| N  | 3.13777800  | 0.46766100  | -1.15142100 |
| Ga | -1.68183000 | 0.10760500  | -1.95569900 |
| Ga | 1.48903700  | -0.07501300 | -2.10297900 |
| N  | -1.51331100 | 3.39337100  | -1.78225600 |
| N  | -1.78813900 | -1.78746400 | -2.02405200 |
| N  | 1.66472000  | 3.19078100  | -1.87857500 |
| N  | 1.37837000  | -1.96903600 | -2.15190100 |
| H  | -1.81146000 | -4.21719900 | 1.53987900  |
| H  | 1.39959300  | -4.39813200 | 1.41093900  |
| H  | 4.20593100  | 2.56856600  | 1.21615500  |
| H  | 4.51621500  | 0.12490400  | 1.33215800  |
| H  | 3.90134800  | -2.64840300 | 0.95177200  |
| H  | -4.12978200 | -2.19593200 | 1.27386300  |
| H  | -4.39742100 | 0.62723800  | 1.68988700  |
| H  | -3.82502500 | 3.02139900  | 1.53847700  |
| H  | 4.54700000  | 2.90729600  | -1.83353400 |
| H  | 3.95015300  | 0.10766500  | -1.70320600 |
| H  | 4.25175800  | -2.29550300 | -2.10462000 |
| H  | 2.91323400  | -4.33967000 | -1.44272500 |
| H  | -0.30928800 | -4.15834000 | -1.30831100 |
| H  | -4.68126600 | -1.79199600 | -1.74618800 |
| H  | -3.53206000 | -3.97642700 | -1.18408100 |
| H  | 1.64026600  | 2.93228600  | -2.86939100 |
| H  | -1.56928900 | 3.11311900  | -2.74070300 |
| H  | 1.48156000  | 0.54480900  | -3.50522100 |
| H  | -1.73075500 | 0.72578800  | -3.37641200 |
| H  | 1.33504200  | -2.29295800 | -3.13483500 |
| H  | -1.87441900 | -2.11205300 | -3.00610800 |
| H  | 1.75101600  | 4.20931500  | -1.85541700 |
| H  | -1.45479100 | 4.39003200  | -1.72684600 |
| H  | 3.44851500  | 3.96887600  | 0.84592400  |
| H  | 0.25068200  | 4.15003400  | 0.98036500  |
| H  | -2.94752200 | 4.32957500  | 1.10273300  |
| H  | -4.08103600 | 0.56056500  | -1.38110900 |
| H  | -4.36842100 | 3.40977500  | -1.47586500 |
| C  | 1.69473900  | -0.38041400 | 2.96121000  |
| O  | 1.73013400  | -1.66718200 | 3.05534900  |
| O  | -1.49216600 | -1.94227700 | 3.27019000  |
| H  | -1.55139500 | -2.43557300 | 4.10290900  |

H 1.67481500 0.15711400 3.91290900

**5A\_GaN**

HF= -1060.803005

|    |             |             |             |
|----|-------------|-------------|-------------|
| Ga | -1.37556900 | 2.44531500  | 1.70977600  |
| Ga | -1.74398400 | -2.66468200 | 1.57827500  |
| N  | -1.52732100 | 0.72318000  | 1.44085800  |
| Ga | -3.20090400 | 0.04230300  | 0.90827200  |
| N  | -2.99556200 | 3.34558400  | 1.00824300  |
| N  | -3.29005900 | -1.84114300 | 0.72626000  |
| Ga | -3.14984700 | 2.71738900  | -0.91303400 |
| Ga | -3.42137000 | -2.41331100 | -1.15476700 |
| N  | -3.17479100 | 0.83524800  | -0.96174100 |
| Ga | 1.80044300  | 2.51276800  | 2.30205300  |
| Ga | 1.46414500  | -2.86175000 | 1.48395700  |
| N  | 1.67966100  | 0.31832100  | 1.79359900  |
| Ga | -0.04324000 | -0.15050700 | 0.76180600  |
| Ga | 3.24067800  | -0.34537200 | 0.64295200  |
| N  | 0.20432000  | 3.15096400  | 0.91788700  |
| N  | -0.09187100 | -2.01878700 | 0.62191200  |
| N  | 3.40391100  | 2.95432900  | 0.82027100  |
| N  | 3.04919400  | -2.22969800 | 0.55089500  |
| Ga | 0.12552100  | 2.52132400  | -0.92924800 |
| Ga | -0.21211500 | -2.61008400 | -1.24931300 |
| Ga | 3.36616400  | 2.36037200  | -1.03895200 |
| Ga | 2.99655400  | -2.80626900 | -1.34365700 |
| N  | 0.04240300  | 0.64525700  | -1.04850800 |
| N  | 3.15827100  | 0.45419200  | -1.13367100 |
| Ga | -1.65439600 | 0.11922200  | -1.99087400 |
| Ga | 1.51796900  | -0.07861700 | -2.10431500 |
| N  | -1.47134700 | 3.40367600  | -1.81023800 |
| N  | -1.76864500 | -1.77525900 | -2.06228200 |
| N  | 1.70650500  | 3.18561300  | -1.87274200 |
| N  | 1.39765200  | -1.97216700 | -2.15623300 |
| H  | -1.84240400 | -4.20987700 | 1.49768800  |
| H  | 1.36892400  | -4.40640100 | 1.40295000  |
| H  | 4.21126800  | 2.54669100  | 1.24818800  |
| H  | 4.50832000  | 0.10137800  | 1.36404000  |
| H  | 3.88400200  | -2.66835300 | 0.97313800  |
| H  | -4.14781200 | -2.17688700 | 1.20968700  |
| H  | -4.40607600 | 0.64699100  | 1.62682700  |
| H  | -3.82037300 | 3.03851700  | 1.48497000  |
| H  | 4.58671300  | 2.88791500  | -1.79718200 |
| H  | 3.97480100  | 0.09107300  | -1.67724400 |
| H  | 4.26892800  | -2.31299500 | -2.07881400 |
| H  | 2.91338300  | -4.35146800 | -1.43422400 |
| H  | -0.30947000 | -4.15449800 | -1.33413500 |
| H  | -4.66485700 | -1.76611500 | -1.81553000 |
| H  | -3.53246100 | -3.95693000 | -1.24423100 |
| H  | 1.69142400  | 2.92859800  | -2.86412900 |
| H  | -1.51840400 | 3.12501500  | -2.76962700 |
| H  | 1.52786600  | 0.54280100  | -3.50501800 |
| H  | -1.68472200 | 0.73937800  | -3.41042400 |
| H  | 1.36348800  | -2.29471600 | -3.14025900 |

|   |             |             |             |
|---|-------------|-------------|-------------|
| H | -1.84624600 | -2.09822800 | -3.04571700 |
| H | 1.79753300  | 4.20367900  | -1.84721100 |
| H | -1.40854600 | 4.39996100  | -1.75278700 |
| H | 3.46473500  | 3.95120900  | 0.87184200  |
| H | 0.26656800  | 4.14788600  | 0.97222300  |
| H | -2.93184800 | 4.34296300  | 1.06052500  |
| H | -4.05707000 | 0.58296800  | -1.44068900 |
| H | -4.32946700 | 3.43368200  | -1.53447400 |
| C | 1.66271900  | -0.39142500 | 2.96116800  |
| O | 1.68489700  | -1.67924000 | 3.05468900  |
| O | -1.57081400 | -1.97346700 | 3.26382100  |
| H | -1.56440200 | -2.53536500 | 4.05577400  |
| H | 1.63384400  | 0.14493500  | 3.91325600  |
| H | -1.79768100 | 0.19909400  | 5.45426300  |
| H | -1.75667200 | -0.23894400 | 4.84879700  |

### TS5A\_GaN

HF= -1060.756031

|    |             |             |             |
|----|-------------|-------------|-------------|
| Ga | -1.36070000 | 2.45569200  | 1.76578900  |
| Ga | -1.74330500 | -2.66949500 | 1.57626500  |
| N  | -1.47929100 | 0.66665600  | 1.62768000  |
| Ga | -3.18061500 | 0.02564900  | 0.95539100  |
| N  | -2.99614500 | 3.34339900  | 1.02708600  |
| N  | -3.29021900 | -1.84418800 | 0.72036600  |
| Ga | -3.15079800 | 2.72240400  | -0.89967600 |
| Ga | -3.41934200 | -2.40862000 | -1.15710500 |
| N  | -3.16866100 | 0.83791600  | -0.93625000 |
| Ga | 1.76507500  | 2.43085500  | 2.24730300  |
| Ga | 1.46419500  | -2.86309600 | 1.48218000  |
| N  | 1.62338400  | 0.34084100  | 1.74763600  |
| Ga | 3.21235400  | -0.33962000 | 0.69880600  |
| N  | 0.20315800  | 3.14897600  | 0.93702900  |
| N  | -0.10705600 | -2.00995000 | 0.60774500  |
| N  | 3.40298600  | 2.95400300  | 0.84040900  |
| N  | 3.04911700  | -2.22987100 | 0.54852800  |
| Ga | 0.12592900  | 2.54329300  | -0.92688700 |
| Ga | -0.21026700 | -2.60381100 | -1.25056100 |
| Ga | 3.37167700  | 2.35811500  | -1.01946400 |
| Ga | 2.99904400  | -2.79949000 | -1.34404500 |
| N  | 0.01844900  | 0.67188100  | -1.05915300 |
| N  | 3.15709600  | 0.45802400  | -1.11652100 |
| Ga | -1.66217300 | 0.12308500  | -1.99397700 |
| Ga | 1.52543200  | -0.06893400 | -2.09679500 |
| N  | -1.47073800 | 3.41147200  | -1.79103300 |
| N  | -1.76821900 | -1.76607300 | -2.06371700 |
| N  | 1.70710600  | 3.19497600  | -1.85295200 |
| N  | 1.39668000  | -1.95928400 | -2.15541000 |
| H  | -1.84151900 | -4.21389700 | 1.48916600  |
| H  | 1.37017600  | -4.40973100 | 1.39583700  |
| H  | 4.21051500  | 2.54523100  | 1.26743400  |
| H  | 4.50821500  | 0.09952400  | 1.37471900  |
| H  | 3.88486400  | -2.66916000 | 0.97370800  |
| H  | -4.14708700 | -2.18036000 | 1.20767600  |
| H  | -4.40613200 | 0.64175200  | 1.63428700  |

|    |             |             |             |
|----|-------------|-------------|-------------|
| H  | -3.82154800 | 3.03358500  | 1.50138200  |
| H  | 4.58751700  | 2.89729100  | -1.77655600 |
| H  | 3.97637400  | 0.09992600  | -1.66685600 |
| H  | 4.27125400  | -2.30242500 | -2.07677900 |
| H  | 2.91606500  | -4.34366200 | -1.44017700 |
| H  | -0.30687900 | -4.14822100 | -1.34125800 |
| H  | -4.66279400 | -1.75922800 | -1.81652700 |
| H  | -3.53005500 | -3.95174000 | -1.25239300 |
| H  | 1.69693000  | 2.89305200  | -2.83269200 |
| H  | -1.52634700 | 3.12682300  | -2.77387700 |
| H  | 1.53029200  | 0.55735100  | -3.49432300 |
| H  | -1.68241100 | 0.75273700  | -3.40075000 |
| H  | 1.36651000  | -2.28145600 | -3.13977700 |
| H  | -1.84329200 | -2.08622900 | -3.04630900 |
| H  | 1.79801000  | 4.21244600  | -1.82342100 |
| H  | -1.40817400 | 4.40746100  | -1.73006600 |
| H  | 3.46386000  | 3.95085300  | 0.89566800  |
| H  | 0.26559700  | 4.14630700  | 0.99500500  |
| H  | -2.93288400 | 4.33986700  | 1.08168400  |
| H  | -4.05572600 | 0.58843400  | -1.43290600 |
| H  | -4.32901000 | 3.43956100  | -1.51679100 |
| C  | 1.47887100  | -0.38703900 | 2.98743500  |
| O  | -1.78772400 | -1.93120800 | 3.23926100  |
| O  | 1.61405100  | -1.70595000 | 3.02567700  |
| H  | 1.79017000  | 0.12895700  | 3.89843200  |
| H  | -1.48848900 | -2.37530500 | 4.04769200  |
| H  | -0.00291600 | -0.12069000 | 3.33601300  |
| H  | -0.77287700 | 0.06611300  | 2.90861400  |
| Ga | -0.00442800 | -0.13819100 | 0.70277400  |

## 6A\_GaN

HF= -1060.862915

|    |             |             |             |
|----|-------------|-------------|-------------|
| Ga | -1.50369500 | 2.42991800  | 2.02212500  |
| Ga | -1.57255300 | -2.77188000 | 1.57981100  |
| N  | -1.58165000 | 0.55019300  | 1.69405200  |
| Ga | -3.22647700 | -0.15950300 | 0.84655400  |
| N  | -3.22043600 | 3.13992900  | 0.98318600  |
| N  | -3.16768100 | -2.05030500 | 0.71356700  |
| Ga | -3.31551500 | 2.51986400  | -0.91091900 |
| Ga | -3.24195600 | -2.64014900 | -1.16688500 |
| N  | -3.21189100 | 0.62666300  | -0.97522600 |
| Ga | 1.52525700  | 2.44551300  | 2.00172200  |
| Ga | 1.64137400  | -2.75067700 | 1.50927200  |
| N  | 1.62592200  | 0.48679300  | 1.72209700  |
| Ga | 3.22832100  | -0.12566500 | 0.70405000  |
| N  | -0.01543800 | 3.15955900  | 0.91673200  |
| N  | 0.01083900  | -2.02085800 | 0.59339900  |
| N  | 3.19081500  | 3.17890900  | 0.84390100  |
| N  | 3.19432200  | -2.01698400 | 0.56915600  |
| Ga | -0.06470400 | 2.53984900  | -0.93579300 |
| Ga | -0.02648400 | -2.62048900 | -1.23664700 |
| Ga | 3.20740300  | 2.56215500  | -1.04094700 |
| Ga | 3.18945500  | -2.60142300 | -1.30642900 |
| N  | -0.03373300 | 0.66240800  | -1.01680000 |

|    |             |             |             |
|----|-------------|-------------|-------------|
| N  | 3.12733300  | 0.66476800  | -1.10862300 |
| Ga | -1.64305100 | -0.00103500 | -2.00262900 |
| Ga | 1.52472500  | 0.01937700  | -2.07432300 |
| N  | -1.68268800 | 3.29346700  | -1.82452200 |
| N  | -1.63534400 | -1.89304200 | -2.06736600 |
| N  | 1.50293500  | 3.28993500  | -1.86282900 |
| N  | 1.53779300  | -1.87333100 | -2.13594200 |
| H  | -1.56647500 | -4.32006100 | 1.50186100  |
| H  | 1.65168900  | -4.30087900 | 1.43229100  |
| H  | 4.02109900  | 2.82788600  | 1.27911200  |
| H  | 4.48097100  | 0.40825200  | 1.40414800  |
| H  | 4.04728800  | -2.39826600 | 1.01662500  |
| H  | -4.00084500 | -2.44711700 | 1.19126000  |
| H  | -4.45125800 | 0.35371800  | 1.59788900  |
| H  | -4.02726400 | 2.77857300  | 1.45379300  |
| H  | 4.39619000  | 3.18630800  | -1.76437200 |
| H  | 3.97284000  | 0.35499900  | -1.64100500 |
| H  | 4.43088200  | -2.02460900 | -2.03342700 |
| H  | 3.21067900  | -4.14822600 | -1.39323700 |
| H  | -0.01874900 | -4.16850900 | -1.31810300 |
| H  | -4.52117300 | -2.07949000 | -1.83914500 |
| H  | -3.24842500 | -4.18782700 | -1.25305700 |
| H  | 1.52027100  | 2.98220200  | -2.84062500 |
| H  | -1.71178300 | 2.99990200  | -2.80584500 |
| H  | 1.51522800  | 0.63670600  | -3.48842000 |
| H  | -1.70395300 | 0.61703100  | -3.41855900 |
| H  | 1.53920600  | -2.20454200 | -3.11680400 |
| H  | -1.67706200 | -2.22418200 | -3.04703700 |
| H  | 1.52534200  | 4.31137400  | -1.83915900 |
| H  | -1.68732700 | 4.29176000  | -1.76947200 |
| H  | 3.18486100  | 4.17811400  | 0.89313700  |
| H  | -0.01998400 | 4.15952400  | 0.96893900  |
| H  | -3.22497900 | 4.13892400  | 1.03193100  |
| H  | -4.07543100 | 0.30583300  | -1.46639800 |
| H  | -4.53834900 | 3.13167200  | -1.57044300 |
| C  | 1.72918100  | -0.25989200 | 3.10143100  |
| O  | -1.54712800 | -1.78463400 | 3.15197500  |
| O  | 1.58089400  | -1.65887700 | 3.02410100  |
| H  | 2.70966200  | 0.00498700  | 3.52816500  |
| H  | -0.82041000 | -1.93776200 | 3.78444500  |
| H  | 0.94784200  | 0.15613000  | 3.75249800  |
| H  | -1.58788900 | -0.05735400 | 2.55630000  |
| Ga | 0.00675100  | -0.15567300 | 0.78142600  |

### 7A\_GaN

HF= -1062.039794

|    |             |             |             |
|----|-------------|-------------|-------------|
| Ga | -1.52586900 | 2.37584700  | 2.06544900  |
| Ga | -1.53223100 | -2.81600200 | 1.50930600  |
| N  | -1.58148300 | 0.50176700  | 1.69630800  |
| Ga | -3.22230200 | -0.21039200 | 0.84159600  |
| N  | -3.25630900 | 3.08650600  | 1.04877900  |
| N  | -3.14118900 | -2.09646100 | 0.66426800  |
| Ga | -3.35380700 | 2.50597400  | -0.85728600 |
| Ga | -3.21779100 | -2.64595000 | -1.22540400 |

|    |             |             |             |
|----|-------------|-------------|-------------|
| N  | -3.22687700 | 0.61589100  | -0.96335200 |
| Ga | 1.50400600  | 2.42978500  | 2.02516600  |
| Ga | 1.68057500  | -2.75293600 | 1.42275400  |
| N  | 1.62295400  | 0.47847700  | 1.70382800  |
| Ga | 3.23023900  | -0.09567300 | 0.67113900  |
| N  | -0.05167500 | 3.14737900  | 0.96652200  |
| N  | 0.03447300  | -2.02263100 | 0.53847500  |
| N  | 3.15365700  | 3.20811900  | 0.87777100  |
| N  | 3.22041100  | -1.98279700 | 0.48554600  |
| Ga | -0.10352400 | 2.56709900  | -0.89957600 |
| Ga | -0.00324100 | -2.58498000 | -1.31102600 |
| Ga | 3.16805800  | 2.63076800  | -1.02040800 |
| Ga | 3.21187400  | -2.52441200 | -1.39669900 |
| N  | -0.05064500 | 0.69172000  | -1.02130400 |
| N  | 3.11053200  | 0.73481900  | -1.12680500 |
| Ga | -1.65642100 | 0.03030600  | -2.01265800 |
| Ga | 1.51187000  | 0.09165700  | -2.09892300 |
| N  | -1.73522800 | 3.31942900  | -1.76276900 |
| N  | -1.62492600 | -1.85988800 | -2.11735400 |
| N  | 1.44990800  | 3.35631100  | -1.81728500 |
| N  | 1.54568600  | -1.79908100 | -2.20157800 |
| H  | -1.50754400 | -4.36186600 | 1.39795700  |
| H  | 1.70985600  | -4.30132000 | 1.31260000  |
| H  | 3.99028000  | 2.85815200  | 1.30112700  |
| H  | 4.48060000  | 0.44213200  | 1.37163100  |
| H  | 4.07949200  | -2.36041200 | 0.92589800  |
| H  | -3.96640100 | -2.51312900 | 1.14016300  |
| H  | -4.44920100 | 0.27255700  | 1.60941800  |
| H  | -4.05579800 | 2.70502500  | 1.51546100  |
| H  | 4.34468400  | 3.28656200  | -1.73576300 |
| H  | 3.95696900  | 0.44825800  | -1.67132100 |
| H  | 4.44211500  | -1.91647600 | -2.11731900 |
| H  | 3.25162100  | -4.06839300 | -1.51692300 |
| H  | 0.02316000  | -4.13045200 | -1.42587800 |
| H  | -4.50736500 | -2.08683900 | -1.87891800 |
| H  | -3.20564600 | -4.19131300 | -1.34489400 |
| H  | 1.46580500  | 3.06990500  | -2.80157900 |
| H  | -1.76598100 | 3.04667400  | -2.75005400 |
| H  | 1.48622000  | 0.73900900  | -3.49976600 |
| H  | -1.73205500 | 0.67782200  | -3.41404400 |
| H  | 1.54717100  | -2.10902100 | -3.18967400 |
| H  | -1.66816300 | -2.17015500 | -3.10405600 |
| H  | 1.45984000  | 4.37720300  | -1.77172600 |
| H  | -1.75191200 | 4.31615900  | -1.68621000 |
| H  | 3.13540600  | 4.20585600  | 0.94864100  |
| H  | -0.06852500 | 4.14581700  | 1.04020600  |
| H  | -3.27258000 | 4.08398400  | 1.11901000  |
| H  | -4.08909900 | 0.29523500  | -1.45702100 |
| H  | -4.58731500 | 3.11671100  | -1.49778800 |
| C  | 1.72511500  | -0.28993600 | 3.07054600  |
| O  | -1.55716000 | -1.86131800 | 3.09962300  |
| O  | 1.68816900  | -1.69407800 | 2.96276300  |
| H  | 2.66645500  | 0.03187600  | 3.54294000  |
| H  | -0.95647000 | -2.08498700 | 3.83122100  |



|    |             |             |            |
|----|-------------|-------------|------------|
| H  | 0.89100900  | 0.05683100  | 3.69725400 |
| H  | -1.57935100 | -0.11989100 | 2.54672700 |
| Ga | 0.00797400  | -0.16053300 | 0.75755400 |
| H  | 1.08348000  | -2.56045500 | 5.29080800 |
| H  | 0.78377800  | -2.73250000 | 5.95168000 |

### TS7A\_GaN

HF= -1061.91236

|    |             |             |             |
|----|-------------|-------------|-------------|
| Ga | -1.56798300 | 2.37265200  | 2.11654200  |
| Ga | -1.46808300 | -2.84007100 | 1.52887400  |
| N  | -1.58838500 | 0.47712700  | 1.69468800  |
| Ga | -3.20893700 | -0.26560500 | 0.85212900  |
| N  | -3.31721500 | 3.02182800  | 1.03612000  |
| N  | -3.09290100 | -2.16070600 | 0.68575800  |
| Ga | -3.41093000 | 2.43064800  | -0.85332600 |
| Ga | -3.16797700 | -2.72382600 | -1.19984100 |
| N  | -3.24558300 | 0.53875400  | -0.95927400 |
| Ga | 1.45522800  | 2.42673600  | 1.91992500  |
| Ga | 1.74222500  | -2.71017900 | 1.42854300  |
| N  | 1.60849100  | 0.53282200  | 1.65639600  |
| Ga | 3.20883700  | -0.01910400 | 0.68460600  |
| N  | -0.11491400 | 3.14901500  | 0.94029200  |
| N  | 0.09244800  | -2.02059300 | 0.57979300  |
| N  | 3.08776100  | 3.27635800  | 0.83780700  |
| N  | 3.25102200  | -1.91823200 | 0.49937700  |
| Ga | -0.17070800 | 2.55314200  | -0.91784900 |
| Ga | 0.04415600  | -2.59615300 | -1.29923600 |
| Ga | 3.10530500  | 2.68150800  | -1.06219100 |
| Ga | 3.25696200  | -2.46890500 | -1.39863300 |
| N  | -0.08101700 | 0.67492600  | -1.03840900 |
| N  | 3.08994600  | 0.78390600  | -1.14709100 |
| Ga | -1.67071400 | -0.01713300 | -2.01101000 |
| Ga | 1.49740100  | 0.10952500  | -2.10647500 |
| N  | -1.81291900 | 3.26738900  | -1.78317100 |
| N  | -1.59440400 | -1.91229500 | -2.10108100 |
| N  | 1.37049800  | 3.37058100  | -1.85118300 |
| N  | 1.57308100  | -1.78676400 | -2.19927000 |
| H  | -1.41160700 | -4.38573800 | 1.42776200  |
| H  | 1.80345000  | -4.25845000 | 1.32858000  |
| H  | 3.93332900  | 2.94677000  | 1.25986000  |
| H  | 4.47430800  | 0.54218400  | 1.34444500  |
| H  | 4.13030100  | -2.27115700 | 0.91912700  |
| H  | -3.90965800 | -2.59066300 | 1.16788200  |
| H  | -4.44881800 | 0.18734300  | 1.62055500  |
| H  | -4.10674300 | 2.62681500  | 1.50876800  |
| H  | 4.26645700  | 3.36202100  | -1.78125000 |
| H  | 3.93850400  | 0.51668100  | -1.69625900 |
| H  | 4.47136800  | -1.84031500 | -2.12849900 |
| H  | 3.32863200  | -4.01255600 | -1.50879900 |
| H  | 0.10254900  | -4.14149800 | -1.40388900 |
| H  | -4.47159300 | -2.19624200 | -1.85169500 |
| H  | -3.12392000 | -4.26936200 | -1.30905100 |
| H  | 1.37101700  | 3.07955600  | -2.83493200 |
| H  | -1.85739400 | 2.98556600  | -2.76639600 |

|    |             |             |             |
|----|-------------|-------------|-------------|
| H  | 1.45490000  | 0.74335700  | -3.51631500 |
| H  | -1.76101200 | 0.61543200  | -3.41679300 |
| H  | 1.57679100  | -2.10063300 | -3.18747100 |
| H  | -1.63621900 | -2.22842500 | -3.08806400 |
| H  | 1.35929400  | 4.39180600  | -1.81245000 |
| H  | -1.85010400 | 4.26416400  | -1.71316800 |
| H  | 3.04900600  | 4.27389500  | 0.90196000  |
| H  | -0.15273700 | 4.14736100  | 1.00730700  |
| H  | -3.35411200 | 4.01914600  | 1.09978600  |
| H  | -4.10162400 | 0.19686100  | -1.44745200 |
| H  | -4.65894700 | 3.00696900  | -1.50496000 |
| C  | 1.66419000  | -0.25812600 | 3.45489400  |
| O  | -1.44817300 | -1.89823400 | 3.12391000  |
| O  | 1.89093100  | -1.69052900 | 3.07410500  |
| H  | 0.66246200  | 0.02899800  | 3.72020700  |
| H  | -1.56448800 | -0.11444100 | 2.55918100  |
| H  | 2.52997100  | 0.29699900  | 3.76802000  |
| H  | -1.34716600 | -2.26319200 | 4.01613300  |
| H  | 1.89060200  | -1.94577200 | 4.09700900  |
| H  | 1.72550100  | -1.01243100 | 5.05957800  |
| Ga | 0.01906100  | -0.13971800 | 0.76608900  |

#### 8A\_GaN

HF= -1062.081205

|    |             |             |             |
|----|-------------|-------------|-------------|
| Ga | -1.78388200 | 2.19289000  | 2.36729000  |
| Ga | -1.21828600 | -3.00680200 | 1.38216400  |
| N  | -1.61688400 | 0.27719600  | 1.71664100  |
| Ga | -3.16238300 | -0.52424800 | 0.83243100  |
| N  | -3.56005400 | 2.69382600  | 1.17122300  |
| N  | -2.88895100 | -2.41739100 | 0.61288900  |
| Ga | -3.61061000 | 2.19856600  | -0.72759600 |
| Ga | -2.93298800 | -2.90504800 | -1.33782500 |
| N  | -3.28833300 | 0.32407300  | -0.94047400 |
| Ga | 1.26285400  | 2.45672500  | 1.85474400  |
| Ga | 1.96915100  | -2.60103900 | 1.28832700  |
| N  | 1.54592700  | 0.74120300  | 1.44440300  |
| Ga | 3.18633000  | 0.26782500  | 0.67025200  |
| N  | -0.38048600 | 3.09718500  | 1.08130700  |
| N  | 0.25137300  | -2.00950900 | 0.49404800  |
| N  | 2.80002800  | 3.50057600  | 0.98508200  |
| N  | 3.39168900  | -1.62573800 | 0.44253100  |
| Ga | -0.40473200 | 2.57509700  | -0.79615600 |
| Ga | 0.25647600  | -2.50038700 | -1.43108900 |
| Ga | 2.85565200  | 2.99381600  | -0.95192200 |
| Ga | 3.44627800  | -2.09626500 | -1.52434000 |
| N  | -0.17257800 | 0.72053000  | -1.04106300 |
| N  | 3.00878000  | 1.11478000  | -1.13154400 |
| Ga | -1.68332300 | -0.04370200 | -2.02277100 |
| Ga | 1.45973400  | 0.35917100  | -2.10175200 |
| N  | -2.09316100 | 3.20066300  | -1.63310800 |
| N  | -1.44228600 | -1.92602300 | -2.19772800 |
| N  | 1.06967000  | 3.57685200  | -1.69621100 |
| N  | 1.70928800  | -1.52416000 | -2.28877000 |
| H  | -1.03125000 | -4.53553100 | 1.20705100  |

|    |             |             |             |
|----|-------------|-------------|-------------|
| H  | 2.16087900  | -4.13092000 | 1.11383400  |
| H  | 3.67182000  | 3.22379600  | 1.39089400  |
| H  | 4.41530100  | 0.87273000  | 1.36005900  |
| H  | 4.30931600  | -1.93621000 | 0.80016200  |
| H  | -3.67359100 | -2.94865400 | 1.03356400  |
| H  | -4.44452000 | -0.25120400 | 1.61899200  |
| H  | -4.31099400 | 2.21094900  | 1.62429800  |
| H  | 3.95618000  | 3.81076200  | -1.62680900 |
| H  | 3.87104400  | 0.94706200  | -1.67841300 |
| H  | 4.60010100  | -1.33285400 | -2.22319000 |
| H  | 3.64816500  | -3.62136800 | -1.70835700 |
| H  | 0.44509900  | -4.02859300 | -1.60968600 |
| H  | -4.27930300 | -2.45946600 | -1.96358800 |
| H  | -2.75849300 | -4.43426300 | -1.52104300 |
| H  | 1.10839300  | 3.33409000  | -2.69153300 |
| H  | -2.10237300 | 2.96667800  | -2.63074700 |
| H  | 1.36974100  | 1.04881600  | -3.48542600 |
| H  | -1.82330300 | 0.64372200  | -3.39208800 |
| H  | 1.73366000  | -1.78704000 | -3.29336200 |
| H  | -1.45651600 | -2.19174900 | -3.20012500 |
| H  | 0.97206200  | 4.59034700  | -1.60853300 |
| H  | -2.21451600 | 4.18612000  | -1.51542100 |
| H  | 2.67662400  | 4.48667600  | 1.09703700  |
| H  | -0.50203600 | 4.08400700  | 1.19627200  |
| H  | -3.68086300 | 3.68014900  | 1.28262600  |
| H  | -4.11192400 | -0.06566800 | -1.44502900 |
| H  | -4.90578600 | 2.68649200  | -1.36767500 |
| C  | 2.32743400  | -1.42294900 | 4.14239900  |
| O  | -0.90964700 | -2.36122400 | 3.15509300  |
| O  | 1.55858500  | -2.15698600 | 3.14362100  |
| H  | 1.89757000  | -1.61566100 | 5.12863800  |
| H  | -1.39559300 | -2.70004600 | 3.92564700  |
| H  | 2.29994100  | -0.35601500 | 3.91008900  |
| H  | -1.51753600 | -0.26927700 | 2.58806700  |
| Ga | 0.02830200  | -0.12923500 | 0.75270700  |
| H  | 0.49757200  | -2.19968800 | 3.29458700  |
| H  | 3.35507500  | -1.79152400 | 4.12209300  |

### 9A\_GaN

HF= -871.04826

|    |             |             |             |
|----|-------------|-------------|-------------|
| Ga | 1.63516300  | -2.54702400 | 2.12995200  |
| Ga | 1.52942900  | 2.76397700  | 1.81808200  |
| N  | 1.63075400  | -0.56016500 | 1.74104700  |
| Ga | 3.21112700  | 0.22218800  | 0.87462700  |
| N  | 3.30058200  | -3.05533100 | 0.81194400  |
| N  | 3.11130800  | 2.13313700  | 0.85290000  |
| Ga | 3.31815500  | -2.33648000 | -1.01615400 |
| Ga | 3.10643700  | 2.84049700  | -0.98420300 |
| N  | 3.16618700  | -0.43262400 | -0.98934400 |
| Ga | -1.43499700 | -2.47680000 | 1.82803800  |
| Ga | -1.68471900 | 2.66339500  | 1.85317900  |
| N  | -1.57302800 | -0.69179200 | 1.62778100  |
| Ga | -0.01402500 | 0.09258200  | 0.93763700  |
| Ga | -3.18781400 | -0.00740100 | 0.98305600  |

|    |             |             |             |
|----|-------------|-------------|-------------|
| N  | 0.09557300  | -3.15705500 | 0.85030200  |
| N  | -0.12378500 | 2.00638700  | 0.93286800  |
| N  | -3.10956800 | -3.25652100 | 0.88151600  |
| N  | -3.21745100 | 1.92697200  | 1.01501300  |
| Ga | 0.08800800  | -2.41692600 | -0.95005300 |
| Ga | -0.10834700 | 2.74004600  | -0.94963100 |
| Ga | -3.19933400 | -2.51666600 | -0.97475500 |
| Ga | -3.32286500 | 2.63925800  | -0.91486600 |
| N  | 0.02586600  | -0.52815700 | -0.95578800 |
| N  | -3.17911400 | -0.61679900 | -0.92084300 |
| Ga | 1.56399800  | 0.20542600  | -1.92970800 |
| Ga | -1.60632500 | 0.10047700  | -1.88310900 |
| N  | 1.67113700  | -3.08251200 | -1.94732100 |
| N  | 1.48236400  | 2.10968700  | -1.86771200 |
| N  | -1.51314400 | -3.16070600 | -1.88051000 |
| N  | -1.68955700 | 2.01255200  | -1.83245700 |
| H  | 1.48263500  | 4.31362900  | 1.83532600  |
| H  | -1.73390000 | 4.21289600  | 1.86976700  |
| H  | -3.93233000 | -2.95385000 | 1.36397900  |
| H  | -4.44659200 | -0.55891900 | 1.64976900  |
| H  | -4.09555400 | 2.27586000  | 1.41850200  |
| H  | 3.95022200  | 2.52800900  | 1.33197100  |
| H  | 4.48308800  | -0.27930500 | 1.55424200  |
| H  | 4.11325600  | -2.70207400 | 1.27768700  |
| H  | -4.40279200 | -3.14031300 | -1.68161300 |
| H  | -4.04494900 | -0.31111800 | -1.40140400 |
| H  | -4.57443400 | 2.07479300  | -1.63420900 |
| H  | -3.38524700 | 4.18804600  | -0.90726500 |
| H  | -0.15654900 | 4.28917000  | -0.93685700 |
| H  | 4.37502900  | 2.35501600  | -1.73032100 |
| H  | 3.07193700  | 4.39026500  | -0.97659100 |
| H  | -1.56336700 | -2.84279600 | -2.85289300 |
| H  | 1.65208700  | -2.74203200 | -2.88751000 |
| H  | -1.64595200 | -0.41723000 | -3.34205700 |
| H  | 1.57229200  | -0.31635400 | -3.37669300 |
| H  | -1.72676000 | 2.39528300  | -2.79891200 |
| H  | 1.48862600  | 2.49593400  | -2.83351600 |
| H  | -1.50948700 | -4.18248400 | -1.91824700 |
| H  | 1.70223000  | -4.08193800 | -1.95280100 |
| H  | -3.07687400 | -4.25607600 | 0.86994700  |
| H  | 0.12718200  | -4.15701300 | 0.84171000  |
| H  | 3.33076300  | -4.05562200 | 0.80128700  |
| H  | 4.00112000  | -0.05945900 | -1.48795500 |
| H  | 4.52903100  | -2.86064500 | -1.77755400 |
| H  | 1.64514400  | -0.13872300 | 2.68296700  |
| H  | 1.51267300  | 2.04454300  | 3.27861400  |

#### 10A\_GaN

HF= -1059.629119

|    |             |             |            |
|----|-------------|-------------|------------|
| Ga | -1.66040300 | 2.59425200  | 2.14650000 |
| Ga | -1.46530400 | -2.74345700 | 1.85090200 |
| N  | -1.57448600 | 0.56708800  | 1.68771900 |
| Ga | -3.22268000 | -0.23858600 | 0.95229900 |
| N  | -3.34039500 | 3.03943600  | 0.82511600 |

|    |             |             |             |
|----|-------------|-------------|-------------|
| N  | -3.10679000 | -2.14517600 | 0.95607800  |
| Ga | -3.45867500 | 2.28637700  | -0.97251500 |
| Ga | -3.19183100 | -2.89053900 | -0.85893700 |
| N  | -3.27988200 | 0.38238700  | -0.92825900 |
| Ga | 1.44973300  | 2.53867800  | 1.62919600  |
| Ga | 1.74479500  | -2.61671700 | 1.70827200  |
| N  | 1.60219700  | 0.61761300  | 1.36380100  |
| Ga | -0.07756500 | -0.14870900 | 0.71847000  |
| Ga | 3.26921200  | -0.02930800 | 0.56373700  |
| N  | -0.13912100 | 3.16678600  | 0.68606200  |
| N  | 0.11208400  | -2.01706000 | 0.81121300  |
| N  | 3.06133200  | 3.29215600  | 0.54031600  |
| N  | 3.24266200  | -1.91136900 | 0.70662200  |
| Ga | -0.23670300 | 2.40227000  | -1.09719600 |
| Ga | 0.01907000  | -2.76421700 | -1.00203000 |
| Ga | 3.04916300  | 2.53038800  | -1.31831500 |
| Ga | 3.22969500  | -2.63766100 | -1.14494100 |
| N  | -0.13343500 | 0.51770900  | -1.09351400 |
| N  | 3.05167300  | 0.62991600  | -1.23254500 |
| Ga | -1.74498000 | -0.26686500 | -1.95404800 |
| Ga | 1.43159500  | -0.14350800 | -2.09454200 |
| N  | -1.86411100 | 3.02221400  | -2.01911400 |
| N  | -1.62402500 | -2.16021900 | -1.84881900 |
| N  | 1.31827300  | 3.12671000  | -2.12791600 |
| N  | 1.54307400  | -2.03678600 | -1.98888100 |
| H  | -1.40382800 | -4.29211800 | 1.89700600  |
| H  | 1.80884300  | -4.16558200 | 1.75374400  |
| H  | 3.91227800  | 3.00626300  | 0.98316300  |
| H  | 4.46268900  | 0.62182100  | 1.28900800  |
| H  | 4.12495400  | -2.21979800 | 1.13489800  |
| H  | -3.91101300 | -2.53664300 | 1.49306900  |
| H  | -4.45610100 | 0.27048300  | 1.68695600  |
| H  | -4.12361700 | 2.68977700  | 1.34150700  |
| H  | 4.21451300  | 3.13306400  | -2.08674400 |
| H  | 3.89775300  | 0.30756500  | -1.73000500 |
| H  | 4.43510400  | -2.07841200 | -1.94287200 |
| H  | 3.30621800  | -4.18537200 | -1.10930800 |
| H  | 0.08172500  | -4.31236400 | -0.96046900 |
| H  | -4.50344500 | -2.43063200 | -1.54438700 |
| H  | -3.14309300 | -4.43953600 | -0.82177300 |
| H  | 1.31828500  | 2.78906800  | -3.09489400 |
| H  | -1.89326300 | 2.66244400  | -2.95181900 |
| H  | 1.39580400  | 0.35459700  | -3.53848800 |
| H  | -1.81850300 | 0.22783600  | -3.39526700 |
| H  | 1.53124100  | -2.44529900 | -2.94355800 |
| H  | -1.68023100 | -2.57181500 | -2.80046000 |
| H  | 1.30338300  | 4.14742700  | -2.18611800 |
| H  | -1.90444500 | 4.02105200  | -2.04317800 |
| H  | 3.01965000  | 4.29123800  | 0.51028600  |
| H  | -0.18040500 | 4.16655200  | 0.65911900  |
| H  | -3.38044100 | 4.03921700  | 0.79572000  |
| H  | -4.13848900 | -0.00880600 | -1.37189700 |
| H  | -4.70644900 | 2.78159800  | -1.68907400 |
| H  | -1.52663900 | 0.14837600  | 2.63103100  |

|   |             |             |            |
|---|-------------|-------------|------------|
| H | -1.39145100 | -1.96812000 | 3.26854800 |
| C | 1.76873900  | 0.34986700  | 2.75874000 |
| O | 1.82488400  | 1.50236400  | 3.42234200 |
| O | 1.85816800  | -0.85077300 | 3.19219600 |

### TS10\_GaN

HF= -1059.562951

|    |             |             |             |
|----|-------------|-------------|-------------|
| Ga | 1.50573700  | -2.39894100 | 1.67844400  |
| Ga | 1.52604100  | 2.74094600  | 1.74677800  |
| N  | 1.49693400  | -0.60025600 | 1.70557400  |
| Ga | 3.16906000  | 0.17642100  | 1.05176400  |
| N  | 3.20975900  | -3.14136500 | 0.98944300  |
| N  | 3.15900600  | 2.05468200  | 0.89464400  |
| Ga | 3.37198800  | -2.43277400 | -0.91256800 |
| Ga | 3.28731700  | 2.71325800  | -0.94448500 |
| N  | 3.25739400  | -0.55202600 | -0.86439800 |
| Ga | -1.65365400 | -2.64363500 | 2.16881200  |
| Ga | -1.68469900 | 2.71868800  | 1.56845100  |
| N  | -1.59787900 | -0.47642800 | 1.69107900  |
| Ga | 0.04824700  | 0.12609700  | 0.66906900  |
| Ga | -3.22258700 | 0.12474400  | 0.65516400  |
| N  | 0.00777700  | -3.16438400 | 0.81482800  |
| N  | -0.05118400 | 1.99565300  | 0.69801600  |
| N  | -3.19324000 | -3.18573900 | 0.63345400  |
| N  | -3.19260400 | 2.02481500  | 0.56285400  |
| Ga | 0.08564100  | -2.48473600 | -1.02541900 |
| Ga | 0.07579700  | 2.69142500  | -1.12330200 |
| Ga | -3.16055900 | -2.50670800 | -1.19384700 |
| Ga | -3.13545900 | 2.66935600  | -1.30192400 |
| N  | 0.08750500  | -0.60814000 | -1.09162900 |
| N  | -3.07054000 | -0.59344500 | -1.20588400 |
| Ga | 1.74262100  | 0.10727300  | -1.94873000 |
| Ga | -1.46248300 | 0.08129900  | -2.12495900 |
| N  | 1.76737700  | -3.19432800 | -1.87169000 |
| N  | 1.70990200  | 1.99632600  | -1.92384800 |
| N  | -1.41527400 | -3.19389000 | -2.01680300 |
| N  | -1.45561100 | 1.97567100  | -2.10077900 |
| H  | 1.51811400  | 4.29136500  | 1.72686300  |
| H  | -1.69518100 | 4.26937100  | 1.54786300  |
| H  | -4.03866800 | -2.85219400 | 1.05292500  |
| H  | -4.50899100 | -0.43939500 | 1.25105000  |
| H  | -4.07059000 | 2.37981200  | 0.98181300  |
| H  | 3.96695200  | 2.43515300  | 1.42936300  |
| H  | 4.41153100  | -0.37827200 | 1.74820800  |
| H  | 3.99878700  | -2.79720300 | 1.50066100  |
| H  | -4.31025300 | -3.09891900 | -2.01254800 |
| H  | -3.89917800 | -0.27337000 | -1.77102100 |
| H  | -4.35050400 | 2.11846200  | -2.09100200 |
| H  | -3.15833600 | 4.21889800  | -1.33245300 |
| H  | 0.06672600  | 4.24117700  | -1.14774900 |
| H  | 4.58978800  | 2.17981000  | -1.59309100 |
| H  | 3.29223400  | 4.26319400  | -0.97318100 |
| H  | -1.39252200 | -2.89785900 | -2.99705600 |
| H  | 1.81965600  | -2.87574800 | -2.81826100 |

|   |             |             |             |
|---|-------------|-------------|-------------|
| H | -1.38001300 | -0.48322200 | -3.54368500 |
| H | 1.83492600  | -0.46106200 | -3.36471500 |
| H | -1.42442900 | 2.34243300  | -3.06892000 |
| H | 1.78766900  | 2.36444100  | -2.89009800 |
| H | -1.43534500 | -4.21606700 | -2.03179400 |
| H | 1.77310800  | -4.19408200 | -1.85317100 |
| H | -3.18610200 | -4.18603600 | 0.64604000  |
| H | 0.01445800  | -4.16522000 | 0.83052200  |
| H | 3.21523000  | -4.14227700 | 1.00267200  |
| H | 4.13862200  | -0.21851500 | -1.32351100 |
| H | 4.61244700  | -3.03775400 | -1.51564500 |
| H | 0.65617600  | -0.30469000 | 2.96632200  |
| H | 1.46518100  | 2.07190700  | 3.19671300  |
| C | -1.28106100 | 0.28422400  | 2.82904600  |
| O | -0.25104500 | -0.09362600 | 3.57751200  |
| O | -1.86691000 | 1.42067000  | 3.07347700  |

### TS10'\_GaN

HF= -1059.519041

|    |             |             |             |
|----|-------------|-------------|-------------|
| Ga | -1.85936300 | 2.48841700  | 2.12795000  |
| Ga | -1.22263700 | -2.85582700 | 1.83728000  |
| N  | -1.67167700 | 0.49782600  | 1.62222700  |
| Ga | -3.19481400 | -0.44696900 | 0.94749200  |
| N  | -3.57015900 | 2.75920400  | 0.85207600  |
| N  | -2.88379100 | -2.36775500 | 1.03758000  |
| Ga | -3.62748100 | 2.01699400  | -0.95442500 |
| Ga | -2.94501200 | -3.12997900 | -0.86531500 |
| N  | -3.30359500 | 0.12059900  | -0.92172100 |
| Ga | 1.21853700  | 2.53723300  | 1.71193800  |
| Ga | 1.96553800  | -2.46582700 | 1.68050800  |
| N  | 1.49713900  | 0.64653500  | 1.36387800  |
| Ga | -0.09994300 | -0.15344500 | 0.71976800  |
| Ga | 3.24143600  | 0.22350100  | 0.59409100  |
| N  | -0.39081000 | 3.14907100  | 0.69892400  |
| N  | 0.21427900  | -2.03504200 | 0.81313600  |
| N  | 2.78784900  | 3.53693000  | 0.53907300  |
| N  | 3.40124000  | -1.66228300 | 0.63661200  |
| Ga | -0.42248700 | 2.38665200  | -1.08039500 |
| Ga | 0.24399500  | -2.74032700 | -1.02255600 |
| Ga | 2.83399700  | 2.78408000  | -1.30516200 |
| Ga | 3.43270900  | -2.35046600 | -1.17961300 |
| N  | -0.18438900 | 0.50578400  | -1.10506500 |
| N  | 2.98824200  | 0.88586300  | -1.23412200 |
| Ga | -1.71345400 | -0.38472300 | -1.95617800 |
| Ga | 1.44408600  | 0.00072600  | -2.09918500 |
| N  | -2.11183400 | 2.87752200  | -1.99900200 |
| N  | -1.46148800 | -2.27633800 | -1.85330900 |
| N  | 1.05071300  | 3.24291000  | -2.12194100 |
| N  | 1.68582600  | -1.88828300 | -2.00948100 |
| H  | -1.03431500 | -4.39446300 | 1.87456100  |
| H  | 2.15643700  | -4.00445300 | 1.71714300  |
| H  | 3.66157900  | 3.31944200  | 0.97639700  |
| H  | 4.40694400  | 0.98656700  | 1.26654200  |
| H  | 4.30226800  | -1.87234200 | 1.09833100  |

|   |             |             |             |
|---|-------------|-------------|-------------|
| H | -3.67884700 | -2.84822200 | 1.49190700  |
| H | -4.45099200 | -0.09621000 | 1.70378700  |
| H | -4.31949300 | 2.34392400  | 1.37014800  |
| H | 3.93687600  | 3.48628000  | -2.09412900 |
| H | 3.85436900  | 0.64254000  | -1.75151300 |
| H | 4.58421900  | -1.69028000 | -1.98001500 |
| H | 3.63589600  | -3.88687000 | -1.15286800 |
| H | 0.43342700  | -4.27833100 | -0.98982200 |
| H | -4.29333400 | -2.77555800 | -1.54214600 |
| H | -2.76940300 | -4.66994700 | -0.83691800 |
| H | 1.07348100  | 2.91135600  | -3.09075600 |
| H | -2.11614700 | 2.52135000  | -2.93353200 |
| H | 1.34785300  | 0.49371700  | -3.54812000 |
| H | -1.84451200 | 0.10334900  | -3.39073700 |
| H | 1.71512700  | -2.28868200 | -2.96926800 |
| H | -1.47443300 | -2.67857300 | -2.81202100 |
| H | 0.95199200  | 4.25926100  | -2.17444600 |
| H | -2.23394900 | 3.86980900  | -2.01737200 |
| H | 2.66434100  | 4.52938100  | 0.51474500  |
| H | -0.51396200 | 4.14222000  | 0.67768400  |
| H | -3.69209000 | 3.75248200  | 0.82837900  |
| H | -4.12705900 | -0.33289000 | -1.35799500 |
| H | -4.92321600 | 2.40319700  | -1.65715400 |
| H | -0.03405300 | -0.63462600 | 3.10335500  |
| C | 1.57084900  | 0.23710900  | 2.78829600  |
| O | 1.57651500  | 1.39096200  | 3.48924800  |
| O | 2.21762500  | -0.89399500 | 3.04838700  |
| H | -1.47833400 | 0.12916500  | 2.57083900  |

### 18A\_GaN

HF= -1059.585006

|    |             |             |             |
|----|-------------|-------------|-------------|
| Ga | -1.74647400 | 2.60053900  | 2.18708500  |
| Ga | -1.35842700 | -2.78541400 | 1.87127100  |
| N  | -1.61995700 | 0.48322200  | 1.69109300  |
| Ga | -3.21451700 | -0.29912600 | 0.96900100  |
| N  | -3.43979000 | 2.92236000  | 0.83586600  |
| N  | -2.99448000 | -2.23163700 | 1.08646500  |
| Ga | -3.53945100 | 2.17379200  | -0.95918900 |
| Ga | -3.10150200 | -3.00628700 | -0.82278900 |
| N  | -3.30579200 | 0.25419900  | -0.90458800 |
| Ga | 1.44856800  | 2.50563800  | 1.60834400  |
| Ga | 1.84311000  | -2.54705200 | 1.69992500  |
| N  | 1.47797000  | 0.61650000  | 1.28633400  |
| Ga | -0.10638000 | -0.12471800 | 0.68154100  |
| Ga | 3.21730800  | 0.05887400  | 0.64378800  |
| N  | -0.25053800 | 3.15916300  | 0.66788600  |
| N  | 0.08563200  | -2.02534300 | 0.89954800  |
| N  | 2.94368600  | 3.39735200  | 0.49433000  |
| N  | 3.30948400  | -1.84126000 | 0.63266700  |
| Ga | -0.32207300 | 2.38977400  | -1.09678400 |
| Ga | 0.10194900  | -2.76885000 | -0.99414000 |
| Ga | 2.95723000  | 2.61425900  | -1.34013100 |
| Ga | 3.30492700  | -2.53136800 | -1.16527500 |
| N  | -0.19828600 | 0.49298800  | -1.13103800 |



|    |             |             |             |
|----|-------------|-------------|-------------|
| N  | 3.01297800  | 0.71513900  | -1.24466600 |
| Ga | -1.75331500 | -0.33208600 | -1.95422500 |
| Ga | 1.43632900  | -0.09016600 | -2.09965300 |
| N  | -1.99081700 | 2.94328400  | -2.02151900 |
| N  | -1.58576100 | -2.23580900 | -1.82059700 |
| N  | 1.18499500  | 3.15797200  | -2.15807300 |
| N  | 1.56994900  | -1.99531600 | -1.99033600 |
| H  | -1.24224400 | -4.33146100 | 1.92421500  |
| H  | 1.96271800  | -4.09377100 | 1.75278200  |
| H  | 3.80796200  | 3.14341700  | 0.93116700  |
| H  | 4.44292900  | 0.78128500  | 1.24274600  |
| H  | 4.20383400  | -2.07102300 | 1.10536900  |
| H  | -3.81242300 | -2.66613700 | 1.53390900  |
| H  | -4.45331800 | 0.12136900  | 1.71892100  |
| H  | -4.20892800 | 2.54882100  | 1.35999500  |
| H  | 4.07960500  | 3.26570600  | -2.14171900 |
| H  | 3.86449400  | 0.43295800  | -1.76951200 |
| H  | 4.48304500  | -1.93407200 | -1.97612300 |
| H  | 3.43560400  | -4.07511100 | -1.12327600 |
| H  | 0.21902500  | -4.31360000 | -0.94593100 |
| H  | -4.43398500 | -2.59572600 | -1.49895800 |
| H  | -2.99831300 | -4.55247200 | -0.77896900 |
| H  | 1.18876900  | 2.81613600  | -3.12335600 |
| H  | -2.01514900 | 2.57839800  | -2.95206800 |
| H  | 1.34738500  | 0.38368900  | -3.55651200 |
| H  | -1.85935700 | 0.14574700  | -3.38502300 |
| H  | 1.58543100  | -2.40680800 | -2.94996700 |
| H  | -1.61831700 | -2.64452200 | -2.77858100 |
| H  | 1.13419000  | 4.17754500  | -2.22065100 |
| H  | -2.06611000 | 3.94012800  | -2.04954800 |
| H  | 2.86714200  | 4.39421000  | 0.46011600  |
| H  | -0.32515200 | 4.15897600  | 0.63789500  |
| H  | -3.51812800 | 3.92085400  | 0.80196300  |
| H  | -4.15220000 | -0.16172300 | -1.34093400 |
| H  | -4.82018600 | 2.60525600  | -1.66564600 |
| C  | 1.50239300  | 0.30973300  | 2.77463100  |
| O  | 2.00212100  | 1.64600900  | 3.25473500  |
| O  | 2.16714100  | -0.91427600 | 2.98413400  |
| H  | -1.53528200 | 0.19789800  | 2.67491700  |
| H  | 0.48782400  | 0.24000300  | 3.19865800  |

### 11A\_GaN

HF= -1059.581354

|    |             |             |             |
|----|-------------|-------------|-------------|
| Ga | -1.38792600 | 2.45148400  | 1.67435400  |
| Ga | -1.59022800 | -2.66397000 | 1.82985700  |
| N  | -1.49887200 | 0.70320900  | 1.54937000  |
| Ga | -3.18106800 | -0.04557600 | 1.11184100  |
| N  | -3.08179200 | 3.26503600  | 1.03569900  |
| N  | -3.22440600 | -1.93398100 | 1.02728100  |
| Ga | -3.33481300 | 2.53382500  | -0.83881900 |
| Ga | -3.44416500 | -2.61102600 | -0.79808900 |
| N  | -3.29733400 | 0.65165400  | -0.78764400 |
| Ga | 1.81811800  | 2.72312000  | 2.08453900  |
| Ga | 1.61054000  | -2.76437700 | 1.53829900  |

|    |             |             |             |
|----|-------------|-------------|-------------|
| N  | 1.73138900  | 0.43580300  | 1.68346500  |
| Ga | -0.03518300 | -0.13728000 | 0.77185700  |
| Ga | 3.23639400  | -0.23750000 | 0.46916800  |
| N  | 0.11042000  | 3.16545100  | 0.74846900  |
| N  | -0.01000400 | -2.01084800 | 0.72782000  |
| N  | 3.30156300  | 3.06446200  | 0.45450200  |
| N  | 3.11025900  | -2.13210700 | 0.47776600  |
| Ga | -0.06028800 | 2.44263500  | -1.05580800 |
| Ga | -0.24245300 | -2.71211900 | -1.08978600 |
| Ga | 3.16914300  | 2.37191100  | -1.36278600 |
| Ga | 2.95901400  | -2.81287600 | -1.38144300 |
| N  | -0.09183000 | 0.56119500  | -1.07048100 |
| N  | 3.02048400  | 0.45695000  | -1.34560300 |
| Ga | -1.82177800 | -0.07309600 | -1.87712700 |
| Ga | 1.34274200  | -0.17664700 | -2.18171900 |
| N  | -1.74156500 | 3.22091700  | -1.87477300 |
| N  | -1.87433700 | -1.96951600 | -1.84263300 |
| N  | 1.43169200  | 3.09918600  | -2.13148700 |
| N  | 1.28462200  | -2.07268300 | -2.13138700 |
| H  | -1.64011600 | -4.21378600 | 1.83504900  |
| H  | 1.56351600  | -4.31474300 | 1.54308000  |
| H  | 4.14860100  | 2.70589700  | 0.84944200  |
| H  | 4.53646600  | 0.28047700  | 1.07042100  |
| H  | 3.98514900  | -2.52411700 | 0.86301100  |
| H  | -4.02789800 | -2.27193100 | 1.59326300  |
| H  | -4.35680600 | 0.56065200  | 1.88137000  |
| H  | -3.86431600 | 2.95839200  | 1.57989200  |
| H  | 4.31950500  | 2.89607000  | -2.22731800 |
| H  | 3.81344500  | 0.09181200  | -1.92520500 |
| H  | 4.16461000  | -2.31975100 | -2.22162100 |
| H  | 2.92365700  | -4.36245600 | -1.38735900 |
| H  | -0.29137300 | -4.26126100 | -1.08920300 |
| H  | -4.74840700 | -2.03904100 | -1.40922100 |
| H  | -3.50722200 | -4.15994900 | -0.80117600 |
| H  | 1.36307100  | 2.78949400  | -3.10536000 |
| H  | -1.83931900 | 2.89028400  | -2.81358800 |
| H  | 1.24208000  | 0.36906600  | -3.61156400 |
| H  | -1.96306300 | 0.46989200  | -3.31950600 |
| H  | 1.19922500  | -2.44880100 | -3.09239400 |
| H  | -2.00306600 | -2.34791900 | -2.80058300 |
| H  | 1.48887100  | 4.11958100  | -2.16392700 |
| H  | -1.70980300 | 4.22035800  | -1.87244400 |
| H  | 3.33178500  | 4.06443400  | 0.45093800  |
| H  | 0.14125100  | 4.16616000  | 0.74801200  |
| H  | -3.05000100 | 4.26559300  | 1.03274700  |
| H  | -4.19980100 | 0.34451600  | -1.19498800 |
| H  | -4.57597300 | 3.17627200  | -1.41654700 |
| C  | 1.76493200  | -0.22875900 | 2.86819100  |
| O  | 1.68598000  | 0.49824300  | 4.01051400  |
| O  | 1.85742900  | -1.51547500 | 3.03369200  |
| H  | 1.64284900  | -0.09047700 | 4.79616400  |
| H  | -1.39537200 | -1.98116100 | 3.27882200  |

TS11\_GaN

HF= -1059.498255

|    |             |             |             |
|----|-------------|-------------|-------------|
| Ga | 1.55720300  | -2.35621500 | 1.72865500  |
| Ga | 1.37220400  | 2.78410400  | 1.79387600  |
| N  | 1.59075300  | -0.61407200 | 1.48609600  |
| Ga | 3.17524300  | 0.24847000  | 1.06552000  |
| N  | 3.31876000  | -3.01738200 | 1.04305100  |
| N  | 3.02625300  | 2.16386500  | 1.06624000  |
| Ga | 3.50074100  | -2.29296400 | -0.83136200 |
| Ga | 3.21862800  | 2.85380800  | -0.83892000 |
| N  | 3.32969200  | -0.40613300 | -0.80831800 |
| Ga | -1.55867600 | -2.69921900 | 2.11863800  |
| Ga | -1.82755100 | 2.63305900  | 1.51122100  |
| N  | -1.56673800 | -0.46198900 | 1.71574800  |
| Ga | 0.04983500  | 0.14027900  | 0.77661000  |
| Ga | -3.20549800 | -0.00954500 | 0.55118800  |
| N  | 0.12766200  | -3.16886600 | 0.76438300  |
| N  | -0.09408800 | 2.04248700  | 0.70256500  |
| N  | -3.06232300 | -3.31858200 | 0.47900600  |
| N  | -3.27175800 | 1.89249700  | 0.44251100  |
| Ga | 0.23506700  | -2.44517100 | -1.03727900 |
| Ga | 0.01809000  | 2.70316100  | -1.12208700 |
| Ga | -2.99382900 | -2.62468000 | -1.33667000 |
| Ga | -3.18217900 | 2.55228800  | -1.40505200 |
| N  | 0.13062400  | -0.55900600 | -1.07925800 |
| N  | -2.98889200 | -0.70423500 | -1.32532900 |
| Ga | 1.78510700  | 0.18269900  | -1.89489100 |
| Ga | -1.37824400 | 0.03858100  | -2.18087500 |
| N  | 1.97235100  | -3.10152800 | -1.86374500 |
| N  | 1.71470100  | 2.08930700  | -1.86907800 |
| N  | -1.20135000 | -3.22907300 | -2.11210400 |
| N  | -1.44771100 | 1.94069800  | -2.15186900 |
| H  | 1.30145800  | 4.33303800  | 1.78652100  |
| H  | -1.90083900 | 4.18216100  | 1.50311200  |
| H  | -3.93372800 | -3.02371200 | 0.87354800  |
| H  | -4.50854700 | -0.63403300 | 1.07621900  |
| H  | -4.17750700 | 2.20311400  | 0.84465100  |
| H  | 3.83251800  | 2.58083700  | 1.55336400  |
| H  | 4.38143300  | -0.21511500 | 1.86322900  |
| H  | 4.07621900  | -2.64634200 | 1.58244200  |
| H  | -4.09643300 | -3.25190300 | -2.20106000 |
| H  | -3.80933800 | -0.41442200 | -1.92298600 |
| H  | -4.34769500 | 1.96004200  | -2.23768700 |
| H  | -3.26747900 | 4.09984100  | -1.42350800 |
| H  | -0.05362600 | 4.25142700  | -1.13401500 |
| H  | 4.56199500  | 2.37998100  | -1.44928000 |
| H  | 3.16100900  | 4.40286600  | -0.85464000 |
| H  | -1.15927800 | -2.92298800 | -3.08862400 |
| H  | 2.04190600  | -2.77203600 | -2.80545600 |
| H  | -1.22808500 | -0.50471300 | -3.61459700 |
| H  | 1.97584700  | -0.35360300 | -3.33116300 |
| H  | -1.40335700 | 2.31212500  | -3.11820300 |
| H  | 1.79775000  | 2.46296900  | -2.83501200 |
| H  | -1.17906700 | -4.25103000 | -2.13618100 |
| H  | 2.01840700  | -4.10035400 | -1.85330700 |

|   |             |             |             |
|---|-------------|-------------|-------------|
| H | -3.01465000 | -4.31783700 | 0.48355600  |
| H | 0.17480100  | -4.16870700 | 0.77201900  |
| H | 3.36477300  | -4.01732500 | 1.04818300  |
| H | 4.20096600  | -0.03717300 | -1.21430700 |
| H | 4.79572900  | -2.83285200 | -1.41423400 |
| H | 0.13782700  | 1.08131600  | 2.99087100  |
| C | -1.47356100 | 0.31659000  | 2.91606300  |
| O | -1.41557600 | -0.44058600 | 4.06290800  |
| O | -2.11888300 | 1.48620100  | 3.01537800  |
| H | -1.42184700 | 0.14576000  | 4.84887900  |

### 12A\_GaN

HF= -1059.576019

|    |             |             |             |
|----|-------------|-------------|-------------|
| Ga | -1.47733500 | 2.37484800  | 1.90561700  |
| Ga | -1.42468100 | -2.77238100 | 1.81164900  |
| N  | -1.53812400 | 0.58487200  | 1.65236700  |
| Ga | -3.16022200 | -0.18067900 | 1.14141700  |
| N  | -3.28410200 | 3.06321600  | 1.10624200  |
| N  | -3.06955800 | -2.11756100 | 1.13261000  |
| Ga | -3.50328900 | 2.35652700  | -0.75054600 |
| Ga | -3.30911900 | -2.80258900 | -0.79485300 |
| N  | -3.36161200 | 0.45765000  | -0.74233100 |
| Ga | 1.58148400  | 2.58358000  | 1.92618700  |
| Ga | 1.77261000  | -2.67374600 | 1.48369900  |
| N  | 1.65092600  | 0.53004500  | 1.58535900  |
| Ga | -0.01791800 | -0.11165700 | 0.81104200  |
| Ga | 3.21091100  | -0.02930800 | 0.49171900  |
| N  | -0.09529700 | 3.16213400  | 0.78267200  |
| N  | 0.00332200  | -2.03227400 | 0.75337300  |
| N  | 3.09240800  | 3.25963000  | 0.45235700  |
| N  | 3.21231500  | -1.94803900 | 0.40304200  |
| Ga | -0.25622700 | 2.45430600  | -1.01808800 |
| Ga | -0.11083700 | -2.70456400 | -1.12301500 |
| Ga | 2.98259600  | 2.56585600  | -1.37925300 |
| Ga | 3.08715900  | -2.60621300 | -1.45111700 |
| N  | -0.17453700 | 0.56206200  | -1.05728500 |
| N  | 2.94814100  | 0.65503200  | -1.37565600 |
| Ga | -1.84564800 | -0.14860900 | -1.85566200 |
| Ga | 1.31011200  | -0.05319800 | -2.18892500 |
| N  | -1.97789400 | 3.13444700  | -1.81914800 |
| N  | -1.80715900 | -2.06250700 | -1.84242300 |
| N  | 1.19365300  | 3.20973100  | -2.11225900 |
| N  | 1.34905400  | -1.96295100 | -2.16676500 |
| H  | -1.37996200 | -4.32228800 | 1.79850600  |
| H  | 1.82024500  | -4.22401400 | 1.47008200  |
| H  | 3.96428400  | 2.94895300  | 0.83354800  |
| H  | 4.50182900  | 0.54936700  | 1.02071000  |
| H  | 4.12006600  | -2.28111500 | 0.78524200  |
| H  | -3.88434600 | -2.52725800 | 1.60674500  |
| H  | -4.38187100 | 0.27644800  | 1.93290600  |
| H  | -4.04001700 | 2.70311300  | 1.65523700  |
| H  | 4.08715300  | 3.18450400  | -2.24236000 |
| H  | 3.75653300  | 0.35128400  | -1.96885300 |
| H  | 4.25051600  | -2.03075800 | -2.29845700 |

|   |             |             |             |
|---|-------------|-------------|-------------|
| H | 3.14625500  | -4.15488900 | -1.47551400 |
| H | -0.06524200 | -4.25370400 | -1.14075300 |
| H | -4.65287900 | -2.30436300 | -1.38457600 |
| H | -3.27768800 | -4.35233100 | -0.81611000 |
| H | 1.13260800  | 2.90762300  | -3.08901500 |
| H | -2.06632600 | 2.80925400  | -2.76077700 |
| H | 1.15343100  | 0.49029700  | -3.62328200 |
| H | -2.04824700 | 0.39178900  | -3.29473100 |
| H | 1.28849900  | -2.33069700 | -3.13802700 |
| H | -1.91033700 | -2.42897200 | -2.80975500 |
| H | 1.18814700  | 4.23201700  | -2.13290700 |
| H | -2.00708000 | 4.13386200  | -1.80500400 |
| H | 3.06156600  | 4.25953500  | 0.46062900  |
| H | -0.12553500 | 4.16276800  | 0.79403200  |
| H | -3.31336800 | 4.06379800  | 1.11511000  |
| H | -4.24810000 | 0.10563800  | -1.14739400 |
| H | -4.79873900 | 2.91148800  | -1.33030600 |
| C | 1.79928600  | -0.12343000 | 2.94116700  |
| O | 3.11769000  | 0.29614900  | 3.40195100  |
| O | 1.69548700  | -1.52727200 | 2.96932500  |
| H | 3.36586800  | -0.25496100 | 4.17274500  |
| H | 1.04344300  | 0.28736800  | 3.62400900  |

#### TS12\_GaN

HF= -1059.557017

|    |             |             |             |
|----|-------------|-------------|-------------|
| Ga | -1.42821300 | 2.51089000  | 2.04522400  |
| Ga | -1.52808100 | -2.68890800 | 1.88256600  |
| N  | -1.54336000 | 0.66833600  | 1.61312500  |
| Ga | -3.16546000 | -0.05542800 | 1.08087800  |
| N  | -3.21986200 | 3.15915200  | 0.90845600  |
| N  | -3.13332900 | -2.02327700 | 1.13017400  |
| Ga | -3.40952400 | 2.40277300  | -0.88666100 |
| Ga | -3.34152000 | -2.77223100 | -0.77273600 |
| N  | -3.31487300 | 0.48757000  | -0.84360200 |
| Ga | 1.59937700  | 2.49903600  | 1.71801000  |
| Ga | 1.67835600  | -2.68093900 | 1.64072600  |
| N  | 1.56791600  | 0.52934200  | 1.42725400  |
| Ga | -0.12727900 | -0.09032700 | 0.72402900  |
| Ga | 3.20794700  | -0.13272500 | 0.54465000  |
| N  | -0.02136000 | 3.16882000  | 0.67135300  |
| N  | -0.02489600 | -2.02159900 | 0.88373200  |
| N  | 3.17521000  | 3.17584600  | 0.42646400  |
| N  | 3.16386600  | -2.04691200 | 0.56724200  |
| Ga | -0.18644600 | 2.40647300  | -1.09694100 |
| Ga | -0.13406300 | -2.76427600 | -1.01471800 |
| Ga | 3.08070700  | 2.41580500  | -1.40581900 |
| Ga | 3.07301700  | -2.75608300 | -1.25660700 |
| N  | -0.14134200 | 0.50232500  | -1.12828100 |
| N  | 3.01411900  | 0.50768900  | -1.31641400 |
| Ga | -1.81821500 | -0.18979000 | -1.90489700 |
| Ga | 1.36466900  | -0.18886700 | -2.14932300 |
| N  | -1.83342400 | 3.08752000  | -1.97967400 |
| N  | -1.78909200 | -2.10962200 | -1.80197900 |
| N  | 1.34581700  | 3.07486900  | -2.18661100 |

|   |             |             |             |
|---|-------------|-------------|-------------|
| N | 1.37400200  | -2.09943100 | -2.04145100 |
| H | -1.52229700 | -4.23882200 | 1.92836000  |
| H | 1.68699900  | -4.23072700 | 1.68613900  |
| H | 4.02827400  | 2.85877600  | 0.84322000  |
| H | 4.49974900  | 0.45572100  | 1.13466500  |
| H | 4.05295600  | -2.37150900 | 0.99408600  |
| H | -3.97440100 | -2.39217300 | 1.59987200  |
| H | -4.40949400 | 0.43312100  | 1.80742200  |
| H | -3.99894900 | 2.83855300  | 1.44921500  |
| H | 4.24025900  | 2.97448200  | -2.23468300 |
| H | 3.83075800  | 0.16251400  | -1.86524100 |
| H | 4.27311000  | -2.24160400 | -2.09191600 |
| H | 3.09361300  | -4.30556300 | -1.22165400 |
| H | -0.12725300 | -4.31367500 | -0.97346500 |
| H | -4.65584300 | -2.26429500 | -1.41798500 |
| H | -3.34877200 | -4.32198000 | -0.73538700 |
| H | 1.30361200  | 2.73742000  | -3.15278800 |
| H | -1.90447600 | 2.72922000  | -2.91076400 |
| H | 1.27774400  | 0.30177100  | -3.59586300 |
| H | -1.93310500 | 0.29350700  | -3.35360100 |
| H | 1.32824400  | -2.50122000 | -3.00229600 |
| H | -1.87977700 | -2.50935400 | -2.76024700 |
| H | 1.36673700  | 4.09538200  | -2.24550300 |
| H | -1.83760600 | 4.08729800  | -2.00370300 |
| H | 3.16941600  | 4.17578200  | 0.39663700  |
| H | -0.02704800 | 4.16904000  | 0.64360400  |
| H | -3.22372200 | 4.15970500  | 0.87929200  |
| H | -4.19679100 | 0.14243500  | -1.25947400 |
| H | -4.67112200 | 2.95190100  | -1.56208700 |
| C | 1.54938400  | 0.05130500  | 2.79824100  |
| O | 2.51795900  | 1.45321700  | 3.30368800  |
| O | 1.96477400  | -1.19893300 | 3.03150200  |
| H | 2.57121200  | 1.63825200  | 4.26443200  |
| H | 0.67067400  | 0.34209100  | 3.38040000  |

### 13A\_GaN

HF= -1059.621567

|    |             |             |             |
|----|-------------|-------------|-------------|
| Ga | 1.44865800  | -2.68756300 | 2.13522200  |
| Ga | 1.72127500  | 2.53132300  | 1.95717900  |
| N  | 1.52550400  | -0.76378700 | 1.61661200  |
| Ga | 3.16798400  | -0.14798700 | 0.99383300  |
| N  | 3.03357300  | -3.34638900 | 0.64238600  |
| N  | 3.26430300  | 1.82360500  | 1.11943600  |
| Ga | 3.23336200  | -2.52392500 | -1.09294500 |
| Ga | 3.46977600  | 2.64654500  | -0.74011800 |
| N  | 3.24451700  | -0.59885600 | -0.96857100 |
| Ga | -1.71106500 | -2.57406500 | 1.50345300  |
| Ga | -1.48493000 | 2.72280000  | 1.80506100  |
| N  | -1.70290800 | -0.54221600 | 1.62774900  |
| Ga | 0.16330200  | 0.07134300  | 0.77074300  |
| Ga | -3.23014100 | 0.33255200  | 0.57676700  |
| N  | -0.16207800 | -3.15601800 | 0.49367300  |
| N  | 0.12660800  | 1.99914500  | 0.96599800  |
| N  | -3.35926900 | -2.96394300 | 0.33914600  |

|    |             |             |             |
|----|-------------|-------------|-------------|
| N  | -3.03328300 | 2.21227100  | 0.76571900  |
| Ga | 0.02595700  | -2.32906100 | -1.20776600 |
| Ga | 0.26260100  | 2.83891100  | -0.89232600 |
| Ga | -3.26168100 | -2.13868700 | -1.46272900 |
| Ga | -2.94437700 | 3.03123300  | -1.04464600 |
| N  | 0.04612800  | -0.41814400 | -1.11595400 |
| N  | -3.08358900 | -0.22993200 | -1.27031900 |
| Ga | 1.76914200  | 0.21215100  | -1.94225000 |
| Ga | -1.40055200 | 0.41230800  | -2.10998500 |
| N  | 1.58364600  | -3.04417400 | -2.19885600 |
| N  | 1.84764700  | 2.12861800  | -1.75823500 |
| N  | -1.59332700 | -2.83440100 | -2.31576900 |
| N  | -1.31426600 | 2.31665200  | -1.90827000 |
| H  | 1.80955500  | 4.07471400  | 2.08143000  |
| H  | -1.39961800 | 4.26719200  | 1.92903000  |
| H  | -4.18174300 | -2.61993600 | 0.79491700  |
| H  | -4.50076000 | -0.21161300 | 1.22035000  |
| H  | -3.88916300 | 2.58810100  | 1.21034400  |
| H  | 4.13761900  | 2.10714100  | 1.59173800  |
| H  | 4.40776600  | -0.74578400 | 1.64393800  |
| H  | 3.84536300  | -3.10135100 | 1.17643400  |
| H  | -4.47673100 | -2.56252200 | -2.27777600 |
| H  | -3.89050400 | 0.19759400  | -1.77835900 |
| H  | -4.19349800 | 2.63200600  | -1.87092700 |
| H  | -2.87119800 | 4.57532600  | -0.93091600 |
| H  | 0.34955100  | 4.38200900  | -0.77279000 |
| H  | 4.73475100  | 2.09687200  | -1.44668400 |
| H  | 3.57072600  | 4.18924800  | -0.62478800 |
| H  | -1.55494700 | -2.45033500 | -3.26444700 |
| H  | 1.65291600  | -2.64246500 | -3.11207900 |
| H  | -1.39428600 | -0.00060700 | -3.58453200 |
| H  | 1.81634100  | -0.19292300 | -3.43202400 |
| H  | -1.26199700 | 2.76586100  | -2.84903300 |
| H  | 1.94575200  | 2.57355900  | -2.69667200 |
| H  | -1.67669500 | -3.84767900 | -2.42548100 |
| H  | 1.52747800  | -4.03973900 | -2.27329100 |
| H  | -3.41472700 | -3.95986800 | 0.25857700  |
| H  | -0.21859500 | -4.15334900 | 0.41678600  |
| H  | 2.97868400  | -4.34335200 | 0.56252100  |
| H  | 4.13647100  | -0.28384100 | -1.39716600 |
| H  | 4.43410000  | -3.09666200 | -1.85438800 |
| C  | -1.67006000 | -0.02199000 | 2.89186900  |
| O  | -2.14231900 | -3.26519400 | 3.08202700  |
| O  | -1.65183000 | 1.24597900  | 3.16061900  |
| H  | -1.46906600 | -3.62856200 | 3.68469500  |
| H  | -1.65111000 | -0.69463700 | 3.75077200  |

#### TS14\_GaN

HF= -1060.775409

|    |            |             |            |
|----|------------|-------------|------------|
| Ga | 1.11984800 | -2.64842300 | 1.95365800 |
| Ga | 1.92026800 | 2.39763700  | 1.95137600 |
| N  | 1.46154400 | -0.87018600 | 1.50636500 |
| Ga | 3.16392200 | -0.39217600 | 1.01607300 |
| N  | 2.73217200 | -3.59504500 | 0.75345300 |

|    |             |             |             |
|----|-------------|-------------|-------------|
| N  | 3.41075100  | 1.54288700  | 1.15088000  |
| Ga | 3.02360300  | -2.80481100 | -1.01585200 |
| Ga | 3.70955800  | 2.31203500  | -0.72025500 |
| N  | 3.20698100  | -0.90393200 | -0.91263600 |
| Ga | -1.98307600 | -2.35321300 | 1.51465600  |
| Ga | -1.25399300 | 2.86538100  | 1.74612700  |
| N  | -1.71387500 | -0.38178300 | 1.56680100  |
| Ga | 0.09410300  | 0.09132800  | 0.78361300  |
| Ga | -3.16158000 | 0.59701800  | 0.56463200  |
| N  | -0.43406700 | -3.12883600 | 0.55197500  |
| N  | 0.32322900  | 2.00392300  | 0.91758900  |
| N  | -3.59888200 | -2.66102500 | 0.34520600  |
| N  | -2.82750500 | 2.47176600  | 0.68665700  |
| Ga | -0.16148000 | -2.32471000 | -1.17955900 |
| Ga | 0.53407800  | 2.78115800  | -0.92521900 |
| Ga | -3.41369900 | -1.86650000 | -1.46488400 |
| Ga | -2.64151800 | 3.25009000  | -1.12984000 |
| N  | 0.02873100  | -0.43886900 | -1.12056600 |
| N  | -3.06395100 | 0.01053600  | -1.30379100 |
| Ga | 1.80224900  | 0.02473300  | -1.90934000 |
| Ga | -1.33324700 | 0.49695400  | -2.13298500 |
| N  | 1.35296800  | -3.21714600 | -2.11456400 |
| N  | 2.06765800  | 1.92076400  | -1.75581200 |
| N  | -1.79140900 | -2.73300700 | -2.28390400 |
| N  | -1.06709000 | 2.38183800  | -1.95825700 |
| H  | 2.14171300  | 3.92909600  | 2.05158100  |
| H  | -1.03584200 | 4.39835100  | 1.84673400  |
| H  | -4.39410200 | -2.23833900 | 0.78260700  |
| H  | -4.50700500 | 0.19582200  | 1.16358300  |
| H  | -3.65262600 | 2.93049300  | 1.11744000  |
| H  | 4.29520300  | 1.75756200  | 1.63002400  |
| H  | 4.31371700  | -1.10666500 | 1.73322100  |
| H  | 3.55361600  | -3.41186400 | 1.29554600  |
| H  | -4.64021300 | -2.20969000 | -2.29476300 |
| H  | -3.82165600 | 0.49693000  | -1.83165400 |
| H  | -3.90892800 | 2.94654000  | -1.96870300 |
| H  | -2.43479300 | 4.78329600  | -1.04034700 |
| H  | 0.75411500  | 4.31232300  | -0.82939900 |
| H  | 4.93136800  | 1.64158100  | -1.39820000 |
| H  | 3.94366500  | 3.84174500  | -0.62868400 |
| H  | -1.70640700 | -2.37046100 | -3.23799500 |
| H  | 1.46986200  | -2.83926800 | -3.03312300 |
| H  | -1.32742400 | 0.04983800  | -3.59560800 |
| H  | 1.85157400  | -0.41937400 | -3.39053400 |
| H  | -0.96365700 | 2.80667300  | -2.90354000 |
| H  | 2.21246800  | 2.33779900  | -2.69864200 |
| H  | -1.96170300 | -3.73680800 | -2.37823000 |
| H  | 1.21090600  | -4.20519200 | -2.17358700 |
| H  | -3.74003100 | -3.64944600 | 0.28021000  |
| H  | -0.57541300 | -4.11834100 | 0.49083600  |
| H  | 2.58992800  | -4.58409100 | 0.68869500  |
| H  | 4.12629300  | -0.67655700 | -1.31887800 |
| H  | 4.18273300  | -3.51225600 | -1.72544900 |
| C  | -1.69700600 | 0.14618800  | 2.92849100  |



|   |             |             |            |
|---|-------------|-------------|------------|
| O | -2.57426800 | -3.19965000 | 2.96433200 |
| O | -1.45330800 | 1.45733100  | 3.11069000 |
| H | -2.04481700 | -3.40122200 | 3.75208100 |
| H | -0.54713600 | -0.93552100 | 3.51406100 |
| H | -2.40899700 | -0.28867900 | 3.63436600 |
| H | -0.10461600 | -1.69762300 | 3.47127300 |

#### 14A\_GaN

HF= -1060.901469

|    |             |             |             |
|----|-------------|-------------|-------------|
| Ga | 1.36098800  | -2.62658000 | 1.81164600  |
| Ga | 1.74457000  | 2.54421400  | 1.93110900  |
| N  | 1.49395600  | -0.80387100 | 1.57958900  |
| Ga | 3.16144900  | -0.16701000 | 1.04702100  |
| N  | 2.97731800  | -3.38734000 | 0.78935500  |
| N  | 3.28952300  | 1.77609800  | 1.14722900  |
| Ga | 3.21718800  | -2.58816300 | -1.00452300 |
| Ga | 3.53562300  | 2.55981600  | -0.74057600 |
| N  | 3.25869800  | -0.68585100 | -0.89234700 |
| Ga | -1.82619300 | -2.41596800 | 1.53912600  |
| Ga | -1.45528600 | 2.78519500  | 1.72402000  |
| N  | -1.69439200 | -0.46268600 | 1.57472900  |
| Ga | 0.05917300  | 0.09967700  | 0.84272900  |
| Ga | -3.18583600 | 0.38462900  | 0.57651700  |
| N  | -0.21417200 | -3.14763800 | 0.58596200  |
| N  | 0.20668800  | 2.01933200  | 0.88310500  |
| N  | -3.40410400 | -2.90606200 | 0.37625700  |
| N  | -3.00237600 | 2.27821800  | 0.64924600  |
| Ga | -0.01013200 | -2.33269500 | -1.16343400 |
| Ga | 0.33490600  | 2.80177000  | -0.94799500 |
| Ga | -3.28152700 | -2.10656200 | -1.44109300 |
| Ga | -2.86573700 | 3.04343400  | -1.15518700 |
| N  | 0.06433600  | -0.45008200 | -1.09008300 |
| N  | -3.05871700 | -0.21899600 | -1.29924600 |
| Ga | 1.78568000  | 0.13899000  | -1.90227700 |
| Ga | -1.36660700 | 0.38291300  | -2.12463600 |
| N  | 1.57495900  | -3.13480200 | -2.08109900 |
| N  | 1.92976400  | 2.04398100  | -1.77313600 |
| N  | -1.59573800 | -2.87528100 | -2.25308200 |
| N  | -1.22990800 | 2.27932800  | -1.97797400 |
| H  | 1.85732200  | 4.08845000  | 2.01682300  |
| H  | -1.34526400 | 4.33030100  | 1.80927100  |
| H  | -4.22701900 | -2.53645900 | 0.81028500  |
| H  | -4.51134400 | -0.11277300 | 1.16816500  |
| H  | -3.85197000 | 2.67486500  | 1.09551700  |
| H  | 4.15864500  | 2.07032500  | 1.61457600  |
| H  | 4.37919400  | -0.78433700 | 1.74474700  |
| H  | 3.78356000  | -3.14140600 | 1.32950100  |
| H  | -4.47437900 | -2.55433000 | -2.26714900 |
| H  | -3.84880800 | 0.20760900  | -1.83018800 |
| H  | -4.10870200 | 2.64355200  | -1.99034700 |
| H  | -2.76783900 | 4.58839900  | -1.08029000 |
| H  | 0.44636400  | 4.34551600  | -0.86685600 |
| H  | 4.80162600  | 1.97080100  | -1.41283800 |
| H  | 3.66113000  | 4.10300900  | -0.66357200 |

|   |             |             |             |
|---|-------------|-------------|-------------|
| H | -1.53649500 | -2.51672100 | -3.21065400 |
| H | 1.66495100  | -2.75834000 | -3.00325300 |
| H | -1.32913200 | -0.07922500 | -3.59136900 |
| H | 1.87505600  | -0.32102800 | -3.38377600 |
| H | -1.16081700 | 2.70289800  | -2.92561800 |
| H | 2.04051400  | 2.46116300  | -2.71819600 |
| H | -1.69482100 | -3.88944300 | -2.33782500 |
| H | 1.50290600  | -4.13089900 | -2.13067000 |
| H | -3.47482100 | -3.90250000 | 0.32061100  |
| H | -0.28526600 | -4.14496000 | 0.53381300  |
| H | 2.90497800  | -4.38440300 | 0.73432100  |
| H | 4.16212500  | -0.39751000 | -1.31113900 |
| H | 4.41839800  | -3.22589300 | -1.69086400 |
| C | -1.79943100 | 0.13599400  | 3.01991100  |
| O | -2.19233100 | -3.34186000 | 3.00811100  |
| O | -1.49253000 | 1.51749800  | 3.09478600  |
| H | 1.21802300  | -3.48931800 | 3.13797900  |
| H | -1.09824100 | -0.41556700 | 3.65862800  |
| H | -2.82261100 | -0.05618400 | 3.37558800  |
| H | -1.68859400 | -3.45059700 | 3.82679000  |

### 15A\_GaN

HF= -1062.078128

|    |             |             |             |
|----|-------------|-------------|-------------|
| Ga | -1.32993600 | 2.63631800  | 1.80731000  |
| Ga | -1.79330800 | -2.52761100 | 1.88370600  |
| N  | -1.48926700 | 0.81604200  | 1.56910400  |
| Ga | -3.16158100 | 0.21057200  | 1.00740300  |
| N  | -2.92560700 | 3.43106500  | 0.77851200  |
| N  | -3.32072300 | -1.73059400 | 1.08934000  |
| Ga | -3.16304400 | 2.64978700  | -1.02374200 |
| Ga | -3.56258300 | -2.49494600 | -0.80244300 |
| N  | -3.23449200 | 0.74799100  | -0.92691900 |
| Ga | 1.85643800  | 2.38046000  | 1.55888300  |
| Ga | 1.40309900  | -2.81616000 | 1.70051700  |
| N  | 1.69462600  | 0.42983300  | 1.57771500  |
| Ga | -0.06250900 | -0.09956600 | 0.82757800  |
| Ga | 3.18066300  | -0.43453500 | 0.58570600  |
| N  | 0.26325600  | 3.14360300  | 0.59919000  |
| N  | -0.23825500 | -2.01673600 | 0.85295400  |
| N  | 3.45096300  | 2.85465800  | 0.41325700  |
| N  | 2.96742500  | -2.32543000 | 0.64127500  |
| Ga | 0.06133700  | 2.34585500  | -1.15862700 |
| Ga | -0.36440400 | -2.78461100 | -0.98587300 |
| Ga | 3.33099400  | 2.07087400  | -1.41125700 |
| Ga | 2.83372000  | -3.07384000 | -1.16921000 |
| N  | -0.04366000 | 0.46452000  | -1.09981200 |
| N  | 3.07793300  | 0.18621700  | -1.28605500 |
| Ga | -1.76665900 | -0.09288900 | -1.93140900 |
| Ga | 1.38317400  | -0.38328600 | -2.12949000 |
| N  | -1.50387500 | 3.17902000  | -2.08227900 |
| N  | -1.94004200 | -1.99576000 | -1.81826300 |
| N  | 1.66377300  | 2.87203300  | -2.23073500 |
| N  | 1.21658900  | -2.27827500 | -1.99913800 |
| H  | -1.93083600 | -4.07041100 | 1.95618800  |

|   |             |             |             |
|---|-------------|-------------|-------------|
| H | 1.26982800  | -4.36009200 | 1.77269400  |
| H | 4.26435700  | 2.46896600  | 0.85094200  |
| H | 4.50870500  | 0.03862800  | 1.19214800  |
| H | 3.80711800  | -2.73795200 | 1.09218000  |
| H | -4.19728700 | -2.01412100 | 1.55137100  |
| H | -4.37504900 | 0.84249400  | 1.70224700  |
| H | -3.73998000 | 3.19324100  | 1.31025700  |
| H | 4.53718600  | 2.50690900  | -2.22414500 |
| H | 3.86575300  | -0.24838000 | -1.81390700 |
| H | 4.08955400  | -2.68676300 | -1.99111000 |
| H | 2.71154800  | -4.61768800 | -1.10720500 |
| H | -0.50017100 | -4.32696400 | -0.91782500 |
| H | -4.81387800 | -1.88126100 | -1.48025500 |
| H | -3.71239600 | -4.03653900 | -0.73859400 |
| H | 1.60687900  | 2.52182400  | -3.19154800 |
| H | -1.59205900 | 2.81115300  | -3.00812100 |
| H | 1.36529500  | 0.09083300  | -3.59308100 |
| H | -1.83640300 | 0.38039700  | -3.40944300 |
| H | 1.14883900  | -2.69341400 | -2.95056500 |
| H | -2.04999300 | -2.40398100 | -2.76710400 |
| H | 1.77908800  | 3.88516300  | -2.30672600 |
| H | -1.41613300 | 4.17428400  | -2.12347800 |
| H | 3.53730900  | 3.85026400  | 0.36611500  |
| H | 0.35017600  | 4.14016500  | 0.55524200  |
| H | -2.83761500 | 4.42720800  | 0.73204400  |
| H | -4.13891500 | 0.47605500  | -1.35477600 |
| H | -4.34871800 | 3.31087700  | -1.71431600 |
| C | 1.78167000  | -0.18115600 | 3.01866400  |
| O | 2.22404600  | 3.29027200  | 3.03774300  |
| O | 1.46450200  | -1.56019100 | 3.08056300  |
| H | -1.18461300 | 3.48738400  | 3.14153200  |
| H | 1.07924700  | 0.37245200  | 3.65520600  |
| H | 2.80272500  | 0.00069800  | 3.38569400  |
| H | 1.71415600  | 3.40202000  | 3.85219200  |
| H | -1.75156300 | -1.01948900 | 4.04200700  |
| H | -1.88847500 | -1.66405300 | 4.39807400  |

#### TS15\_GaN

HF= -1061.945423

|    |             |             |             |
|----|-------------|-------------|-------------|
| Ga | 1.36631100  | -2.59698600 | 1.83212300  |
| Ga | 1.68644600  | 2.58192700  | 1.91381800  |
| N  | 1.48424800  | -0.76530900 | 1.60329900  |
| Ga | 3.15003700  | -0.12135400 | 1.07908300  |
| N  | 3.01505700  | -3.34276000 | 0.84526600  |
| N  | 3.25196900  | 1.82989800  | 1.16261100  |
| Ga | 3.27298500  | -2.55781700 | -0.95217800 |
| Ga | 3.52222000  | 2.59796000  | -0.72734700 |
| N  | 3.29034700  | -0.65157700 | -0.85407000 |
| Ga | -1.81509300 | -2.40438100 | 1.50288400  |
| Ga | -1.51222800 | 2.77931200  | 1.65064700  |
| N  | -1.69314300 | -0.48286600 | 1.48597600  |
| Ga | 0.02909500  | 0.07972400  | 0.82560200  |
| Ga | -3.16662800 | 0.32739400  | 0.53096400  |
| N  | -0.17516300 | -3.14650800 | 0.58615600  |

|    |             |             |             |
|----|-------------|-------------|-------------|
| N  | 0.14825400  | 2.02059600  | 0.89746400  |
| N  | -3.36424400 | -2.94861000 | 0.32041300  |
| N  | -3.02325800 | 2.24377900  | 0.57593700  |
| Ga | 0.04375400  | -2.34399000 | -1.16467500 |
| Ga | 0.32263700  | 2.79619800  | -0.99085300 |
| Ga | -3.22352700 | -2.15968400 | -1.49460600 |
| Ga | -2.87685700 | 2.99411500  | -1.25412000 |
| N  | 0.11131600  | -0.45543800 | -1.11612800 |
| N  | -3.02662300 | -0.26615000 | -1.36894400 |
| Ga | 1.82505800  | 0.14075500  | -1.89839600 |
| Ga | -1.33015700 | 0.33918200  | -2.16926500 |
| N  | 1.65854100  | -3.13316000 | -2.05046200 |
| N  | 1.93959800  | 2.05404300  | -1.77855300 |
| N  | -1.51188100 | -2.91668100 | -2.27820100 |
| N  | -1.21629400 | 2.24637300  | -2.03946200 |
| H  | 1.77769500  | 4.12812400  | 1.98776900  |
| H  | -1.42378600 | 4.32624500  | 1.72407700  |
| H  | -4.19896400 | -2.58592000 | 0.73715900  |
| H  | -4.52073500 | -0.16330200 | 1.06890900  |
| H  | -3.89635400 | 2.63204400  | 0.98278700  |
| H  | 4.11147200  | 2.13693100  | 1.64217800  |
| H  | 4.36670800  | -0.71336600 | 1.80128400  |
| H  | 3.80876500  | -3.08148800 | 1.39679600  |
| H  | -4.39380700 | -2.63359100 | -2.34367300 |
| H  | -3.81153100 | 0.13996400  | -1.92058400 |
| H  | -4.10020700 | 2.57084800  | -2.10657300 |
| H  | -2.80028200 | 4.54083200  | -1.19120900 |
| H  | 0.41270100  | 4.34190100  | -0.92146000 |
| H  | 4.80699600  | 2.01981400  | -1.37293400 |
| H  | 3.62643100  | 4.14326700  | -0.66184400 |
| H  | -1.44105100 | -2.56560100 | -3.23776700 |
| H  | 1.75925700  | -2.76350500 | -2.97427200 |
| H  | -1.25883500 | -0.12895500 | -3.63641600 |
| H  | 1.94421900  | -0.32700500 | -3.37267300 |
| H  | -1.13787400 | 2.66073600  | -2.99247300 |
| H  | 2.06232800  | 2.46273400  | -2.72896000 |
| H  | -1.59638600 | -3.93272500 | -2.35567600 |
| H  | 1.60020500  | -4.13050800 | -2.09246900 |
| H  | -3.42104900 | -3.94625000 | 0.27249000  |
| H  | -0.23262800 | -4.14504500 | 0.54131100  |
| H  | 2.95661400  | -4.34098900 | 0.79789500  |
| H  | 4.19655100  | -0.35569900 | -1.26114800 |
| H  | 4.49588100  | -3.18361400 | -1.61152000 |
| C  | -1.81056400 | 0.06480600  | 3.36862600  |
| O  | -2.19583200 | -3.33545400 | 2.97000000  |
| O  | -1.71212700 | 1.56937400  | 3.17237000  |
| H  | 1.22186400  | -3.44359100 | 3.16830700  |
| H  | -0.90697100 | -0.44729700 | 3.64839800  |
| H  | -2.78944800 | -0.35674700 | 3.50984700  |
| H  | -1.70873200 | -3.43970900 | 3.79926100  |
| H  | -1.91008000 | 0.60127000  | 5.01148700  |
| H  | -1.80859100 | 1.69758100  | 4.20774500  |

16A\_GaN

HF= -1062.072738

|    |             |             |             |
|----|-------------|-------------|-------------|
| Ga | 1.50565000  | -2.43558400 | 1.94044300  |
| Ga | 1.47132700  | 2.75388200  | 1.81392000  |
| N  | 1.51858500  | -0.60657200 | 1.64676400  |
| Ga | 3.13367700  | 0.12589700  | 1.11156900  |
| N  | 3.23184000  | -3.09973200 | 1.01344100  |
| N  | 3.09850200  | 2.08888700  | 1.11670700  |
| Ga | 3.46062400  | -2.37401100 | -0.81204500 |
| Ga | 3.34882500  | 2.79335300  | -0.79737500 |
| N  | 3.34989900  | -0.46612700 | -0.79254300 |
| Ga | -1.66974000 | -2.48021700 | 1.56304000  |
| Ga | -1.72866000 | 2.71385600  | 1.49559600  |
| N  | -1.66249000 | -0.64402600 | 1.34017100  |
| Ga | -0.01095400 | 0.05730300  | 0.82495700  |
| Ga | -3.15773000 | 0.06037000  | 0.46922100  |
| N  | 0.04008100  | -3.14082900 | 0.69816100  |
| N  | -0.02550900 | 2.03009100  | 0.85059000  |
| N  | -3.14847300 | -3.18025200 | 0.37682600  |
| N  | -3.17017600 | 2.01345600  | 0.45717900  |
| Ga | 0.22550500  | -2.38957200 | -1.07223100 |
| Ga | 0.14830100  | 2.75311000  | -1.11720200 |
| Ga | -3.02990500 | -2.45480200 | -1.45742500 |
| Ga | -3.05175400 | 2.71297700  | -1.43642900 |
| N  | 0.19211200  | -0.49807300 | -1.12399300 |
| N  | -2.97209600 | -0.54881500 | -1.42668200 |
| Ga | 1.85155500  | 0.17335700  | -1.89169200 |
| Ga | -1.30346400 | 0.13089700  | -2.20798400 |
| N  | 1.91607900  | -3.10431100 | -1.90854400 |
| N  | 1.82798100  | 2.10035600  | -1.84546700 |
| N  | -1.25713500 | -3.12251900 | -2.19272000 |
| N  | -1.33035000 | 2.05742700  | -2.16182700 |
| H  | 1.45275300  | 4.30469000  | 1.82521900  |
| H  | -1.74912300 | 4.26445200  | 1.50545800  |
| H  | -4.01450700 | -2.86152000 | 0.76565600  |
| H  | -4.51095900 | -0.45600600 | 0.99102000  |
| H  | -4.08319400 | 2.37022600  | 0.79798900  |
| H  | 3.92634100  | 2.47157600  | 1.59796100  |
| H  | 4.37809900  | -0.34463000 | 1.87930000  |
| H  | 3.99523500  | -2.76089100 | 1.56554600  |
| H  | -4.15017800 | -3.04730400 | -2.31322800 |
| H  | -3.77178000 | -0.22461300 | -1.99719900 |
| H  | -4.22706700 | 2.17024300  | -2.28864700 |
| H  | -3.08518100 | 4.26278300  | -1.43669300 |
| H  | 0.12849700  | 4.30316600  | -1.11061600 |
| H  | 4.68231800  | 2.28204700  | -1.39893700 |
| H  | 3.34304700  | 4.34353000  | -0.79470000 |
| H  | -1.19389700 | -2.80645200 | -3.16487700 |
| H  | 2.00719600  | -2.76614700 | -2.84530700 |
| H  | -1.17610600 | -0.38117300 | -3.66184400 |
| H  | 2.02772300  | -0.34077200 | -3.34197600 |
| H  | -1.26289200 | 2.43392600  | -3.13289300 |
| H  | 1.93811700  | 2.47410000  | -2.81328900 |
| H  | -1.26864200 | -4.14433100 | -2.22906500 |
| H  | 1.92872700  | -4.10418700 | -1.90985100 |

|   |             |             |             |
|---|-------------|-------------|-------------|
| H | -3.13460600 | -4.18076400 | 0.36951200  |
| H | 0.05464300  | -4.14206200 | 0.69477600  |
| H | 3.24448700  | -4.10083200 | 1.00685700  |
| H | 4.23832100  | -0.12431500 | -1.19751200 |
| H | 4.74166000  | -2.93572000 | -1.42527900 |
| C | -2.11248600 | 0.95053400  | 4.12436800  |
| O | -1.97919300 | -3.45589700 | 3.03580600  |
| O | -1.95429900 | 2.27368700  | 3.44137400  |
| H | 1.41857100  | -3.23362000 | 3.31652800  |
| H | -1.36097100 | 0.88018800  | 4.91281900  |
| H | -3.12528800 | 0.88710800  | 4.52697000  |
| H | -1.43023000 | -3.49896800 | 3.83322800  |
| H | -1.94823700 | 0.20582800  | 3.33293800  |
| H | -2.12297300 | 3.03689100  | 4.02282400  |

### TS15'\_GaN

HF= -1062.075069

|    |             |             |             |
|----|-------------|-------------|-------------|
| Ga | -1.41725100 | 2.59912300  | 1.83112200  |
| Ga | -1.70398400 | -2.58124800 | 1.88638400  |
| N  | -1.50602500 | 0.78402600  | 1.54393100  |
| Ga | -3.16153200 | 0.11123500  | 1.01593700  |
| N  | -3.03116300 | 3.33810600  | 0.78643200  |
| N  | -3.26018000 | -1.83221400 | 1.08894700  |
| Ga | -3.24858100 | 2.54962400  | -1.00974800 |
| Ga | -3.47815500 | -2.60474200 | -0.79643500 |
| N  | -3.25643400 | 0.64748000  | -0.92129800 |
| Ga | 1.76273400  | 2.42997100  | 1.56096900  |
| Ga | 1.50089000  | -2.76615000 | 1.69733300  |
| N  | 1.68280300  | 0.47950400  | 1.57387200  |
| Ga | -0.06443300 | -0.10651300 | 0.81472100  |
| Ga | 3.19325200  | -0.32139600 | 0.57580900  |
| N  | 0.16504000  | 3.15471700  | 0.60106800  |
| N  | -0.15614100 | -2.02698500 | 0.83120500  |
| N  | 3.36013500  | 2.96932900  | 0.40905900  |
| N  | 3.04347000  | -2.21701700 | 0.65307800  |
| Ga | -0.02224500 | 2.34896500  | -1.15421500 |
| Ga | -0.27253000 | -2.79014400 | -0.98595300 |
| Ga | 3.25640200  | 2.18160400  | -1.42275200 |
| Ga | 2.93284500  | -2.97528500 | -1.17528800 |
| N  | -0.05395800 | 0.46763400  | -1.10653800 |
| N  | 3.07110600  | 0.29107500  | -1.29142500 |
| Ga | -1.76758300 | -0.14574500 | -1.92765500 |
| Ga | 1.38918800  | -0.33584100 | -2.13443300 |
| N  | -1.60728800 | 3.13364800  | -2.07715500 |
| N  | -1.87303900 | -2.05220800 | -1.81673200 |
| N  | 1.56838800  | 2.92981300  | -2.23161800 |
| N  | 1.29423200  | -2.23368400 | -2.00332600 |
| H  | -1.79067100 | -4.12771000 | 1.95848300  |
| H  | 1.41673200  | -4.31307200 | 1.76876700  |
| H  | 4.18643900  | 2.61000600  | 0.84502200  |
| H  | 4.51018400  | 0.18885500  | 1.18454800  |
| H  | 3.89904300  | -2.60919700 | 1.08440300  |
| H  | -4.12378400 | -2.14587900 | 1.55877400  |
| H  | -4.39398700 | 0.70339200  | 1.71145400  |

|   |             |             |             |
|---|-------------|-------------|-------------|
| H | -3.83627900 | 3.07367600  | 1.31955800  |
| H | 4.45216600  | 2.65821500  | -2.23049800 |
| H | 3.87130900  | -0.11767000 | -1.82048700 |
| H | 4.17392500  | -2.54735800 | -1.99934000 |
| H | 2.86106300  | -4.52241500 | -1.11388300 |
| H | -0.35806600 | -4.33627900 | -0.91842300 |
| H | -4.74998600 | -2.03178900 | -1.47160800 |
| H | -3.57769000 | -4.15045400 | -0.73309500 |
| H | 1.52112500  | 2.57837100  | -3.19250400 |
| H | -1.68517300 | 2.76353400  | -3.00299100 |
| H | 1.35788100  | 0.14097200  | -3.59484700 |
| H | -1.85117400 | 0.32626800  | -3.40514600 |
| H | 1.23320400  | -2.64913300 | -2.95338200 |
| H | -1.97300800 | -2.46386700 | -2.76384900 |
| H | 1.65060300  | 3.94617200  | -2.30729900 |
| H | -1.55197100 | 4.13122300  | -2.11797500 |
| H | 3.41404100  | 3.96718200  | 0.36228800  |
| H | 0.21945700  | 4.15326200  | 0.55736600  |
| H | -2.97555100 | 4.33650700  | 0.74026200  |
| H | -4.15174700 | 0.34614300  | -1.34618400 |
| H | -4.45418200 | 3.17282900  | -1.70383600 |
| C | 1.78176000  | -0.10636400 | 3.00844700  |
| O | 1.38012000  | -1.48324200 | 3.09472500  |
| H | -0.27904200 | -1.73317600 | 3.61188700  |
| H | -1.04863000 | -1.90624400 | 3.73349000  |
| H | -1.36616700 | 3.47850900  | 3.14285700  |
| O | 1.91653500  | 3.14328600  | 3.15308900  |
| H | 2.42390500  | 3.72996200  | 3.71738900  |
| H | 2.82040800  | -0.00009100 | 3.35013900  |
| H | 1.13561300  | 0.47737100  | 3.66931400  |

### 17A\_GaN

HF= -1062.088148

|    |             |             |             |
|----|-------------|-------------|-------------|
| Ga | -1.31517500 | 2.64765500  | 1.79843100  |
| Ga | -1.80222800 | -2.50996300 | 1.90501900  |
| N  | -1.46808000 | 0.85494300  | 1.51091900  |
| Ga | -3.16155400 | 0.20596200  | 1.03066600  |
| N  | -2.89201000 | 3.45415900  | 0.78737100  |
| N  | -3.34622200 | -1.71000500 | 1.05478500  |
| Ga | -3.14799600 | 2.66148900  | -1.00826500 |
| Ga | -3.57916800 | -2.47068200 | -0.77603300 |
| N  | -3.22704800 | 0.77167800  | -0.91429700 |
| Ga | 1.86511900  | 2.40033900  | 1.53813900  |
| Ga | 1.39234500  | -2.82232900 | 1.71207100  |
| N  | 1.70873500  | 0.43668000  | 1.59762400  |
| Ga | -0.08605500 | -0.11005600 | 0.78180800  |
| Ga | 3.18549700  | -0.44098400 | 0.57295200  |
| N  | 0.29514000  | 3.14194800  | 0.59872700  |
| N  | -0.16312900 | -2.01323300 | 0.80896100  |
| N  | 3.47702700  | 2.82699300  | 0.40426900  |
| N  | 2.95032300  | -2.32405700 | 0.70484700  |
| Ga | 0.06796400  | 2.34076900  | -1.16337900 |
| Ga | -0.38402400 | -2.78556700 | -0.96815700 |
| Ga | 3.34013700  | 2.04313500  | -1.42910300 |

|    |             |             |             |
|----|-------------|-------------|-------------|
| Ga | 2.81152100  | -3.10001200 | -1.16057500 |
| N  | -0.02833800 | 0.46812200  | -1.11366100 |
| N  | 3.08010100  | 0.15871100  | -1.28538300 |
| Ga | -1.78350000 | -0.08906000 | -1.92172300 |
| Ga | 1.36881400  | -0.40951200 | -2.13303000 |
| N  | -1.48124600 | 3.18415900  | -2.07704100 |
| N  | -1.94531200 | -1.98311000 | -1.80312200 |
| N  | 1.68356500  | 2.85258200  | -2.23419200 |
| N  | 1.21319000  | -2.29733300 | -1.99266000 |
| H  | -1.95083300 | -4.05150400 | 1.98181100  |
| H  | 1.24639800  | -4.36656900 | 1.78956300  |
| H  | 4.29090500  | 2.43834000  | 0.84045900  |
| H  | 4.51719300  | 0.00634400  | 1.18736300  |
| H  | 3.79417900  | -2.76529400 | 1.09695000  |
| H  | -4.20301900 | -1.97889100 | 1.57841700  |
| H  | -4.35856200 | 0.87939200  | 1.72232200  |
| H  | -3.70679700 | 3.22429700  | 1.32223000  |
| H  | 4.55418500  | 2.46542400  | -2.23550700 |
| H  | 3.86289000  | -0.28358900 | -1.81595500 |
| H  | 4.06747400  | -2.72380200 | -1.98742800 |
| H  | 2.67763000  | -4.64188600 | -1.09422300 |
| H  | -0.53115200 | -4.32624900 | -0.89590500 |
| H  | -4.82782200 | -1.84931500 | -1.45162400 |
| H  | -3.74054100 | -4.01095700 | -0.70761600 |
| H  | 1.62103400  | 2.50002800  | -3.19398500 |
| H  | -1.57499600 | 2.81432200  | -3.00161400 |
| H  | 1.35968900  | 0.07003000  | -3.58839000 |
| H  | -1.83913600 | 0.38450000  | -3.39580800 |
| H  | 1.12398300  | -2.71068100 | -2.93793400 |
| H  | -2.07190400 | -2.39641700 | -2.74553000 |
| H  | 1.80636100  | 3.86443500  | -2.31344100 |
| H  | -1.38598700 | 4.17838000  | -2.12114600 |
| H  | 3.57314800  | 3.82335200  | 0.35436100  |
| H  | 0.38735300  | 4.13801900  | 0.55249400  |
| H  | -2.79689100 | 4.44968100  | 0.73805500  |
| H  | -4.13454600 | 0.50309500  | -1.33442700 |
| H  | -4.32380600 | 3.33851400  | -1.70079200 |
| C  | 1.77174700  | -0.04451500 | 3.00853400  |
| O  | 1.22313000  | -1.43574800 | 3.16874700  |
| H  | -1.31411700 | -1.83927400 | 3.36196800  |
| H  | -1.11364500 | 3.50305400  | 3.12802900  |
| O  | 2.22594100  | 3.17861400  | 3.09071200  |
| H  | 1.62986700  | 3.52961000  | 3.76761600  |
| H  | 2.79777400  | -0.11327300 | 3.37724500  |
| H  | 1.17843100  | 0.57295700  | 3.68499100  |
| H  | 0.24271200  | -1.45424700 | 3.43709000  |

### TS17\_GaN

HF= -1061.950735

|    |             |             |            |
|----|-------------|-------------|------------|
| Ga | -1.25068300 | 2.61690600  | 1.82312800 |
| Ga | -1.84299500 | -2.51530100 | 1.82635700 |
| N  | -1.43743400 | 0.79444300  | 1.55102500 |
| Ga | -3.14464200 | 0.24269000  | 0.99724400 |
| N  | -2.83323100 | 3.48760900  | 0.82868200 |



|    |             |             |             |
|----|-------------|-------------|-------------|
| N  | -3.36328400 | -1.67907700 | 0.99220900  |
| Ga | -3.08003500 | 2.74314800  | -0.98974200 |
| Ga | -3.59846600 | -2.39151600 | -0.86622300 |
| N  | -3.19562500 | 0.84648900  | -0.93007600 |
| Ga | 1.91128800  | 2.30862500  | 1.62133500  |
| Ga | 1.34724900  | -2.87308400 | 1.65097500  |
| N  | 1.65609900  | 0.45301900  | 1.47000200  |
| Ga | -0.01730200 | -0.07151000 | 0.69661300  |
| Ga | 3.13484400  | -0.45287200 | 0.65791200  |
| N  | 0.34888400  | 3.13023800  | 0.65743200  |
| N  | -0.18773900 | -2.00653300 | 0.80860700  |
| N  | 3.52923600  | 2.77133400  | 0.47947700  |
| N  | 2.91103300  | -2.37511800 | 0.68931900  |
| Ga | 0.14337800  | 2.37949000  | -1.12315900 |
| Ga | -0.40704100 | -2.75120500 | -1.04147900 |
| Ga | 3.39927200  | 2.02021300  | -1.34861700 |
| Ga | 2.78465600  | -3.11055200 | -1.21664800 |
| N  | -0.03359000 | 0.50444200  | -1.16755000 |
| N  | 3.10441100  | 0.13569700  | -1.26421500 |
| Ga | -1.76115600 | -0.01021800 | -1.95910800 |
| Ga | 1.40805000  | -0.36849400 | -2.14031200 |
| N  | -1.40435900 | 3.25657300  | -2.03031100 |
| N  | -1.95372600 | -1.91053900 | -1.86595200 |
| N  | 1.75610900  | 2.87965000  | -2.17108200 |
| N  | 1.19983000  | -2.26754000 | -2.03888700 |
| H  | -2.01599800 | -4.05554300 | 1.86929600  |
| H  | 1.17768100  | -4.41540200 | 1.69403200  |
| H  | 4.33261000  | 2.35960500  | 0.91346500  |
| H  | 4.51923200  | -0.08204600 | 1.20992300  |
| H  | 3.75481300  | -2.83938300 | 1.05488300  |
| H  | -4.23296700 | -1.94027100 | 1.49353000  |
| H  | -4.34598600 | 0.91630900  | 1.69733000  |
| H  | -3.65540400 | 3.25875400  | 1.35237200  |
| H  | 4.62032100  | 2.44850700  | -2.15913600 |
| H  | 3.88406400  | -0.29773400 | -1.80365700 |
| H  | 4.05267900  | -2.73683700 | -2.02576600 |
| H  | 2.62675600  | -4.65181300 | -1.18419500 |
| H  | -0.57829000 | -4.29092300 | -1.00302900 |
| H  | -4.83216800 | -1.73665900 | -1.53766200 |
| H  | -3.78383100 | -3.93017400 | -0.83199100 |
| H  | 1.69566800  | 2.54888600  | -3.13851500 |
| H  | -1.49662600 | 2.90819600  | -2.96326500 |
| H  | 1.40033300  | 0.13201500  | -3.58673300 |
| H  | -1.79470500 | 0.49163700  | -3.41129100 |
| H  | 1.11717000  | -2.65799300 | -2.99765400 |
| H  | -2.07496900 | -2.29859400 | -2.82237200 |
| H  | 1.89492500  | 3.89113000  | -2.22749600 |
| H  | -1.29365700 | 4.25013200  | -2.05241300 |
| H  | 3.63980300  | 3.76582500  | 0.45182100  |
| H  | 0.45879700  | 4.12541500  | 0.63268600  |
| H  | -2.72233100 | 4.48220800  | 0.80128000  |
| H  | -4.10399500 | 0.60174300  | -1.36499400 |
| H  | -4.24712900 | 3.44686700  | -1.67202700 |
| C  | 0.39189900  | -0.71803500 | 3.53401600  |

|   |             |             |            |
|---|-------------|-------------|------------|
| O | 1.21653100  | -1.82730300 | 3.42110600 |
| H | 1.73633100  | -2.03776900 | 4.22154200 |
| H | -1.36326500 | -1.83923900 | 3.40065500 |
| H | -1.10500100 | 3.39515400  | 3.20808600 |
| H | -0.32048000 | -0.35349100 | 2.80006800 |
| H | 0.47006200  | -0.20463500 | 4.48806500 |
| O | 2.28822500  | 3.24199100  | 3.09750800 |
| H | 1.70081100  | 3.43609500  | 3.84280500 |

---

<sup>i</sup> F. O. Morais, K. F. Andriani, and J. L. F. Da Silva. Investigation of the Stability Mechanisms of Eight-Atom Binary Metal Clusters Using DFT Calculations and k-means Clustering Algorithm *J. Chem. Inf. Model.* **2021**, 61, 3411–3420.
